# Supplementary material for: A Computational Pipeline for Functional Gene Discovery
Source: Research Square preprint supplement (doi:10.21203/rs.3.rs-770297/v1), 2021-09-01
Supplement: Supplementary file 1 [file cf400f2eb2675127eff3e6d1.csv]

Geneid	baseMean	log2FoldChange	lfcSE	stat	pvalue	padj
Nr2e3	27373.5467	13.58169089	0.756300038	17.95807246	4.15E-72	1.03E-67
Cngb1	15897.33047	14.05017499	0.813892826	17.26293014	8.95E-67	1.11E-62
Rp1	43213.78329	11.64470493	0.6875408	16.9367475	2.41E-64	2.00E-60
Sag	92897.27938	12.19228603	0.724318528	16.8327684	1.40E-63	8.75E-60
Prph2	64954.27415	12.65160413	0.773849836	16.34891363	4.43E-60	2.21E-56
Omg	286.1081887	6.377386341	0.397150468	16.0578593	5.04E-58	2.09E-54
Samd7	6207.898237	11.58660451	0.727585652	15.92472925	4.27E-57	1.52E-53
Cplx3	4145.455636	4.633170336	0.295299324	15.68974244	1.78E-55	5.54E-52
Plch2	7086.244005	8.214959886	0.53801143	15.26911776	1.23E-52	3.40E-49
Pde6b	31767.06866	13.47401373	0.884276626	15.23732884	2.00E-52	4.98E-49
Cxcl16	143.797032	2.394689966	0.157330251	15.22078522	2.57E-52	5.83E-49
BC027072	4140.522022	9.099465098	0.603916796	15.06741519	2.65E-51	5.51E-48
Nt5e	4544.641091	6.575936974	0.441687854	14.8881997	3.93E-50	7.54E-47
LOC108168936	3984.526314	5.296682019	0.356896734	14.8409372	7.96E-50	1.42E-46
Pde6g	46350.03996	12.45042934	0.84075893	14.80856033	1.29E-49	2.14E-46
Rs1	40181.14285	14.84236611	1.007471528	14.73229337	4.00E-49	6.23E-46
Foxp1	1263.485211	-2.867861775	0.194884541	-14.71569659	5.11E-49	7.50E-46
Pitpnm3	10030.13983	8.914175334	0.607445661	14.67485228	9.34E-49	1.29E-45
Grk1	19080.90216	10.36613317	0.715272296	14.49256908	1.35E-47	1.77E-44
E130310I04Rik	1819.885279	8.406024004	0.58297493	14.41918609	3.92E-47	4.89E-44
Kcnv2	11470.54546	9.635563737	0.670533797	14.36998966	7.98E-47	9.48E-44
Impg1	11010.93571	16.22822164	1.162164112	13.96379518	2.59E-44	2.94E-41
Fam53b	2538.559603	2.894971377	0.207703024	13.93803192	3.72E-44	4.03E-41
Gucy2e	8406.327302	9.016006898	0.647627727	13.92158877	4.68E-44	4.86E-41
Fabp12	3475.728713	11.5849283	0.832416557	13.91722474	4.98E-44	4.96E-41
D030047H15Rik	192.7442726	3.822717083	0.2769242	13.80420015	2.40E-43	2.31E-40
Rd3	3946.417224	7.801218708	0.566078762	13.7811542	3.31E-43	3.06E-40
Nrl	44940.98107	10.91595257	0.793894412	13.74987959	5.10E-43	4.54E-40
Cacna1f	4335.481717	8.608800472	0.627355841	13.72235645	7.46E-43	6.41E-40
Lbhd1	3201.050935	9.48523144	0.696451022	13.61938046	3.07E-42	2.55E-39
Rom1	30904.54588	8.800780002	0.656126491	13.41323681	5.06E-41	4.07E-38
Rho	399821.9913	13.20346129	0.98567381	13.39536584	6.44E-41	5.01E-38
Opn1sw	3707.440402	7.219367431	0.539677084	13.37719841	8.22E-41	6.21E-38
Cnga1	15342.64906	15.58316284	1.170462364	13.31368126	1.93E-40	1.41E-37
Gja8	1031.911098	-8.575876992	0.648748993	-13.21909873	6.81E-40	4.85E-37
Nxnl1	5783.836847	12.07781296	0.922754388	13.08887079	3.81E-39	2.64E-36
Mpp4	8966.139733	8.626521818	0.666086857	12.95104643	2.32E-38	1.56E-35
Ano2	4140.055929	8.348507636	0.650175668	12.84038768	9.74E-38	6.39E-35
Zfp385b	2084.496779	5.138700421	0.401592013	12.79582327	1.73E-37	1.11E-34
Gm40387	31.56737525	22.75619247	1.780783135	12.77875561	2.15E-37	1.34E-34
Capn3	248.5004716	-6.243772682	0.488826258	-12.77298954	2.32E-37	1.38E-34
Glp2r	2142.635076	10.51957103	0.823571306	12.77311504	2.32E-37	1.38E-34
Padi2	1061.088144	6.725067003	0.526947647	12.76230579	2.66E-37	1.54E-34
Lingo3	1037.341014	4.209544035	0.330653638	12.73097753	3.98E-37	2.25E-34
Pde6a	31886.97419	13.9177702	1.094640595	12.71446561	4.91E-37	2.72E-34
Gngt1	26095.99565	12.76700279	1.013847528	12.59262605	2.32E-36	1.26E-33
Baiap2l1	68.72637966	-3.193378172	0.254166902	-12.56409922	3.33E-36	1.76E-33
Tcp11l2	1252.921609	3.01825669	0.241688377	12.48821615	8.66E-36	4.50E-33
Cirbp	5111.366097	2.536101878	0.203829747	12.44225595	1.54E-35	7.84E-33
Cacna2d4	8012.121071	7.250389649	0.58587742	12.37526726	3.56E-35	1.77E-32
Rcvrn	30909.99389	13.77293293	1.114935777	12.35311774	4.69E-35	2.29E-32
Gucy2f	5799.33749	11.7177337	0.951373207	12.31665304	7.37E-35	3.53E-32
Gm33676	314.0966159	5.29304939	0.431618698	12.26325321	1.43E-34	6.60E-32
Fam19a3	1026.023532	7.402442811	0.603634809	12.26311456	1.43E-34	6.60E-32
Slc17a7	22852.64816	10.91516106	0.891091958	12.24919713	1.70E-34	7.69E-32
Pde6h	651.1074052	8.150858	0.667551373	12.21008349	2.75E-34	1.22E-31
Rdh8	1473.023744	13.68688953	1.126303603	12.15204275	5.59E-34	2.45E-31
Fn3k	569.4246636	4.252916309	0.351733577	12.09130032	1.17E-33	5.05E-31
Cabp5	723.3803509	6.386106483	0.532074907	12.00226959	3.46E-33	1.46E-30
Gm11744	4807.233024	8.646530512	0.722679234	11.96454817	5.45E-33	2.26E-30
Cfap70	125.656977	2.808018694	0.23545829	11.92575847	8.69E-33	3.55E-30
Cyp4f13	272.7319461	3.180371708	0.267466044	11.89074942	1.32E-32	5.32E-30
Peli3	2989.218331	5.186432711	0.436618133	11.87864708	1.53E-32	6.05E-30
Hs3st3b1	1831.973307	4.764116047	0.401729058	11.85902775	1.93E-32	7.53E-30
Pcdh15	7143.523349	5.567988384	0.471693767	11.80424413	3.71E-32	1.42E-29
Slc24a1	22101.96592	13.16633885	1.116040279	11.79736888	4.03E-32	1.52E-29
Gm7616	101.478819	9.834069048	0.838086443	11.73395553	8.54E-32	3.18E-29
Gm38717	674.0639137	8.171622959	0.699973744	11.67418496	1.73E-31	6.33E-29
Crxos	408.1552632	5.716339307	0.490378999	11.6569823	2.11E-31	7.64E-29
C130026L21Rik	20.99934207	-5.572777038	0.479630206	-11.61890341	3.30E-31	1.18E-28
Gm33224	21.13192049	-5.954823146	0.513693413	-11.59217345	4.52E-31	1.59E-28
Mrc2	242.9875678	-4.169882736	0.359931639	-11.58520752	4.90E-31	1.70E-28
Ttc39b	1023.636576	2.885956124	0.249236132	11.57920444	5.25E-31	1.79E-28
Lactbl1	1769.798224	7.019631495	0.610056895	11.50651939	1.22E-30	4.12E-28
Pla2r1	2917.675336	8.270944664	0.721043196	11.47080329	1.85E-30	6.15E-28
Cplx4	6699.223445	9.897345084	0.863714081	11.45905259	2.12E-30	6.95E-28
Aipl1	12330.87472	8.928522367	0.78081693	11.4348473	2.80E-30	9.07E-28
Ush2a	6523.285275	6.684674764	0.585724858	11.41265336	3.62E-30	1.16E-27
Plk5	971.7241217	9.043830673	0.792704497	11.40882978	3.78E-30	1.19E-27
Ankrd33	3677.550519	9.664734298	0.847874943	11.39877334	4.24E-30	1.32E-27
Nfix	768.6859523	5.199063802	0.45679613	11.3815846	5.17E-30	1.59E-27
Hba.x	1973.392338	-14.78329273	1.300745649	-11.3652448	6.23E-30	1.89E-27
Pdc	60204.77396	8.995804676	0.79354406	11.33623844	8.68E-30	2.61E-27
Mirc35hg	542.5019733	5.837801711	0.515267787	11.32964618	9.36E-30	2.78E-27
St6galnac2	827.5906554	4.452932214	0.393155188	11.32614384	9.74E-30	2.86E-27
A430035B10Rik	756.8935085	4.744129045	0.419105358	11.31965734	1.05E-29	3.04E-27
Entpd2	119.7514021	6.175885044	0.545788277	11.31553261	1.10E-29	3.15E-27
AI847159	2291.628644	11.55933439	1.022644216	11.30337825	1.26E-29	3.58E-27
Ric3	2296.543134	2.061980988	0.182559944	11.29481605	1.39E-29	3.90E-27
Frem2	337.0461681	-3.729794961	0.330385302	-11.28922789	1.48E-29	4.11E-27
X1810055G02Rik	298.2699928	-1.452964322	0.128747854	-11.28534786	1.55E-29	4.25E-27
Hcn1	5791.964037	5.501965863	0.487721586	11.28095623	1.63E-29	4.42E-27
Gm33590	173.7460018	10.60597642	0.943254825	11.24402032	2.48E-29	6.64E-27
Gnat1	147597.6997	12.64910238	1.127351634	11.22019252	3.25E-29	8.61E-27
Fut4	21.24291689	-2.595770893	0.23140117	-11.21762214	3.34E-29	8.77E-27
Stra6	440.6344814	-3.542373552	0.318626783	-11.11762645	1.03E-28	2.66E-26
Cyp51	2226.881574	-1.495965203	0.134562016	-11.11729188	1.03E-28	2.66E-26
Gm12992	260.5634928	2.696131133	0.242614279	11.11282957	1.09E-28	2.76E-26
Fadd	130.8419622	-1.879679624	0.169422069	-11.09465628	1.33E-28	3.35E-26
Rd3l	1297.825988	7.542570087	0.680373	11.08593388	1.47E-28	3.66E-26
Gm31985	59.41141614	5.390187854	0.486409089	11.08159361	1.54E-28	3.77E-26
C1ql2	162.8829422	8.53330659	0.769984776	11.08243546	1.53E-28	3.77E-26
Slc1a1	1027.691393	4.562122089	0.411771827	11.07924776	1.58E-28	3.83E-26
Ppm1n	763.1242385	8.32105911	0.7530002	11.05054037	2.18E-28	5.19E-26
Unc5b	760.8103548	-4.281025342	0.387415397	-11.05021993	2.19E-28	5.19E-26
Lpar1	333.0494832	-4.154101346	0.3760429	-11.04688146	2.27E-28	5.34E-26
X2310030A07Rik	116.6998765	6.977936923	0.631926573	11.04232235	2.39E-28	5.56E-26
Fhod3	2182.344476	3.11887403	0.283412867	11.00470158	3.63E-28	8.37E-26
LOC102634887	102.0536897	4.129108784	0.376238488	10.97471131	5.06E-28	1.16E-25
Adck3	480.8997682	3.706691978	0.337791257	10.97332125	5.14E-28	1.16E-25
Magt1	776.5946169	-2.437931271	0.22227032	-10.96831676	5.43E-28	1.22E-25
Notch3	621.7045513	-3.811705751	0.347575111	-10.96656701	5.53E-28	1.23E-25
Aldh1a1	6939.605748	-4.971280341	0.453466193	-10.96284666	5.77E-28	1.27E-25
Ppargc1b	2101.328493	5.586405663	0.509988792	10.95397733	6.36E-28	1.39E-25
Neurod2	99.06703197	6.540255492	0.598764936	10.92290997	8.96E-28	1.94E-25
Tulp1	16348.26532	7.908092194	0.724916448	10.90897057	1.04E-27	2.24E-25
Slc1a7	3227.642557	6.970830057	0.639414908	10.90188855	1.13E-27	2.41E-25
Gm30140	46.14755752	2.941185081	0.269938396	10.8957641	1.21E-27	2.55E-25
Cabp4	2006.6064	8.992322171	0.825933904	10.88745979	1.32E-27	2.76E-25
Tbc1d24	4141.074509	2.37281948	0.21794757	10.88711143	1.33E-27	2.76E-25
Catsper4	64.16735069	5.512802555	0.506708837	10.87962584	1.44E-27	2.95E-25
Ccdc113	309.9077428	7.683503563	0.706214373	10.87984593	1.44E-27	2.95E-25
Samd11	10302.87572	6.723689912	0.62140638	10.82011728	2.76E-27	5.60E-25
X4.Sep	1971.017864	3.326338415	0.307549873	10.81560654	2.90E-27	5.84E-25
Gm3764	562.5360078	6.540594679	0.605261226	10.8062344	3.22E-27	6.41E-25
Copz2	60.11620968	-2.11961914	0.196654791	-10.77837527	4.36E-27	8.62E-25
Plekha2	1595.098911	4.890678247	0.454006998	10.77225301	4.65E-27	9.14E-25
Rlbp1	4018.915084	5.510220685	0.511711113	10.76822556	4.86E-27	9.47E-25
Gm11419	211.3154102	6.18668861	0.575165072	10.75637049	5.53E-27	1.07E-24
Il9r	55.29793242	5.541618472	0.515432759	10.75138973	5.84E-27	1.12E-24
Impg2	34877.9353	7.032836915	0.654380946	10.7473131	6.10E-27	1.16E-24
Sall4	68.7906606	-8.103920301	0.75730722	-10.70096797	1.01E-26	1.90E-24
Rab23	579.8576845	-1.050303165	0.098176109	-10.6981543	1.04E-26	1.95E-24
Arr3	1352.702481	8.632885241	0.807511367	10.69072906	1.12E-26	2.09E-24
Ppef2	4566.998748	5.781294433	0.541478228	10.67687329	1.31E-26	2.41E-24
Susd3	1568.527362	8.828516082	0.829261694	10.64623646	1.82E-26	3.33E-24
Cckbr	122.5313204	4.178090456	0.39280467	10.63656004	2.01E-26	3.67E-24
Kcne2	570.39834	7.668292187	0.72129654	10.63126157	2.13E-26	3.85E-24
Ccdc102a	37.99108228	-3.036635226	0.285872187	-10.62235281	2.35E-26	4.18E-24
Llgl2	2150.859828	5.771568753	0.543367741	10.62184652	2.36E-26	4.18E-24
Sfrp2	5155.032289	-6.778565326	0.638187699	-10.62158569	2.37E-26	4.18E-24
Rasgrf2	3292.050232	5.90219671	0.555957772	10.61626801	2.50E-26	4.40E-24
Slc38a4	235.9894781	-6.870508567	0.64922597	-10.58261511	3.59E-26	6.25E-24
Bcorl1	419.0928836	-1.962688628	0.185530724	-10.57877953	3.74E-26	6.47E-24
Zswim5	1202.987317	-1.69320444	0.160201113	-10.56924265	4.14E-26	7.11E-24
E330009J07Rik	989.2583901	-1.545589257	0.146315656	-10.56338947	4.40E-26	7.52E-24
X4430402I18Rik	64.84172594	2.870925697	0.271879024	10.55957042	4.59E-26	7.78E-24
Nxnl2	2529.760589	7.801547808	0.739958435	10.54322438	5.46E-26	9.20E-24
Cfap43	88.7982648	-1.459112542	0.138545015	-10.53168562	6.17E-26	1.03E-23
Sez6	2328.650757	4.023587724	0.382886447	10.5085666	7.89E-26	1.31E-23
Platr17	5440.869987	8.64279483	0.823374489	10.49679696	8.94E-26	1.48E-23
Lifr	3779.064813	2.798567007	0.267126757	10.4765507	1.11E-25	1.82E-23
Gemin4	600.786016	-1.649091596	0.157566723	-10.46598903	1.24E-25	2.02E-23
X9030404E10Rik	9.315399506	-5.721471772	0.547127331	-10.45729476	1.36E-25	2.20E-23
Ttc23	219.3131839	-2.46984701	0.236369872	-10.44907707	1.48E-25	2.38E-23
Tenm3	3196.989105	-2.074934108	0.198763502	-10.43921086	1.64E-25	2.62E-23
Negr1	2706.171379	3.05905561	0.293092357	10.43717291	1.68E-25	2.66E-23
Abcg4	2138.014074	3.165158827	0.303480264	10.42953761	1.82E-25	2.87E-23
Nefh	935.7964809	5.906494993	0.566402769	10.42808283	1.85E-25	2.89E-23
Arid3c	215.1298006	8.105922623	0.777769108	10.42201669	1.97E-25	3.07E-23
Wdr86	194.3188959	-3.589473742	0.344753282	-10.41171739	2.19E-25	3.39E-23
Ntf3	12.70325834	-4.088500664	0.393488491	-10.39039454	2.74E-25	4.22E-23
Wdr27	87.37846628	5.420990988	0.522453696	10.37602188	3.19E-25	4.88E-23
Ier3	614.5224261	5.235655839	0.504835111	10.3710216	3.36E-25	5.11E-23
Mlc1	550.020501	5.887467256	0.568108139	10.36328623	3.64E-25	5.50E-23
Pdlim3	162.9641234	4.61484287	0.445336277	10.36260261	3.67E-25	5.51E-23
Cbx7	171.5929164	3.413774836	0.329829456	10.35012118	4.18E-25	6.24E-23
Col5a3	560.1679958	6.697699442	0.647852095	10.33831563	4.73E-25	7.02E-23
Bcl2	521.728607	-2.6476685	0.256567455	-10.31958049	5.75E-25	8.48E-23
Ckmt1	3123.243343	6.73494474	0.654083631	10.29676394	7.29E-25	1.06E-22
Fos	2849.529714	9.187889822	0.892269152	10.29721783	7.25E-25	1.06E-22
Htra1	2802.890918	5.990036758	0.583087717	10.27295994	9.33E-25	1.35E-22
Gm39693	9.653822997	-6.338153089	0.61726932	-10.26805138	9.82E-25	1.41E-22
Popdc3	64.19852046	3.13552341	0.305487362	10.2640037	1.02E-24	1.47E-22
X9030617O03Rik	61.45864554	4.207090843	0.410228383	10.25548455	1.12E-24	1.59E-22
Dnaic2	331.3437227	4.542554117	0.443097194	10.25182326	1.16E-24	1.64E-22
Tef	3528.726321	2.293279341	0.223738729	10.24980944	1.19E-24	1.67E-22
Atp6v1b1	22.85961991	-3.696568473	0.360706601	-10.24813093	1.21E-24	1.69E-22
Dkk1	46.98561889	-7.568528502	0.739340664	-10.23686221	1.36E-24	1.89E-22
Dhh	198.6123889	5.820668949	0.568816797	10.2329414	1.41E-24	1.95E-22
Plekhb1	24596.1629	7.915174723	0.773716459	10.23007153	1.45E-24	2.00E-22
Tcf7l1	282.7565466	-3.276804368	0.320405313	-10.22706003	1.50E-24	2.05E-22
Eml6	758.9368168	2.377293462	0.232771225	10.21300406	1.73E-24	2.36E-22
Sv2b	12658.79334	4.955921704	0.485814338	10.20126686	1.96E-24	2.65E-22
Slc23a2	3401.393263	1.967862281	0.193320532	10.17927199	2.45E-24	3.31E-22
Gpr152	776.0378614	10.08704018	0.992035675	10.16802161	2.75E-24	3.69E-22
Rhog	87.74082291	-1.871416546	0.184081335	-10.16624825	2.81E-24	3.74E-22
Ntn1	77.41053995	-4.981442967	0.491065833	-10.1441449	3.52E-24	4.64E-22
Plxna2	6266.559138	3.003317867	0.296054617	10.14447233	3.51E-24	4.64E-22
Gm38609	133.7752259	3.920238513	0.386489794	10.14318766	3.55E-24	4.66E-22
Frmd4b	4849.113299	3.061386076	0.30201988	10.13637274	3.81E-24	4.97E-22
Clec18a	250.8818713	-4.799750856	0.474158437	-10.12267311	4.38E-24	5.69E-22
Tmem266	531.0914886	4.077670955	0.402909546	10.12056178	4.48E-24	5.78E-22
Eno2	6192.979327	4.952386007	0.48960988	10.11496337	4.74E-24	6.09E-22
Fign	586.9957875	-4.574758375	0.453159294	-10.09525443	5.80E-24	7.41E-22
Pprc1	750.7138005	-2.327980943	0.230858582	-10.08401299	6.50E-24	8.27E-22
Gm39447	43.51952746	3.598937746	0.357010619	10.08075826	6.72E-24	8.50E-22
Prelp	683.6725985	4.468327668	0.443534419	10.07436509	7.17E-24	9.03E-22
Tpd52	5881.661828	2.150043805	0.21380621	10.05604002	8.64E-24	1.08E-21
Atp1b2	27640.38578	4.630080749	0.460659082	10.05099201	9.09E-24	1.13E-21
A730046J19Rik	347.9952551	8.281831326	0.825035971	10.03814575	1.04E-23	1.28E-21
Guca1a	1619.482584	8.705323195	0.867432356	10.03573724	1.06E-23	1.31E-21
Lrrc48	702.2787184	4.299200532	0.428682195	10.0288759	1.14E-23	1.40E-21
A930006I01Rik	707.2856001	12.62846502	1.263318593	9.996263094	1.58E-23	1.93E-21
Sec14l2	2032.979332	4.614324979	0.462156822	9.984327316	1.79E-23	2.17E-21
A530058N18Rik	698.8659439	8.009435542	0.804743261	9.952783611	2.45E-23	2.97E-21
Gm3137	91.05001811	6.936561137	0.697374058	9.946686505	2.61E-23	3.14E-21
Gm10419	184.8527692	5.094921229	0.513194746	9.927851493	3.15E-23	3.77E-21
Syp	15730.87478	4.51956909	0.455260881	9.927426852	3.16E-23	3.77E-21
Crtc3	869.1314143	1.615556202	0.162786108	9.924410761	3.26E-23	3.87E-21
Aldoc	2456.148244	5.44201914	0.550282061	9.889508533	4.62E-23	5.46E-21
Slc22a30	49.84015776	8.783422943	0.888933536	9.880854517	5.04E-23	5.93E-21
A730049H05Rik	490.7935992	-6.462390579	0.655561943	-9.857787884	6.34E-23	7.42E-21
Mip	92.10349562	-7.840270043	0.795575182	-9.854844918	6.53E-23	7.54E-21
Ubxn11	1022.717533	4.087076084	0.414723034	9.854953188	6.52E-23	7.54E-21
Unc80	5416.373259	4.395053279	0.445946687	9.855557636	6.49E-23	7.54E-21
Rgs9	35684.64417	5.433234635	0.551667254	9.848753208	6.94E-23	7.97E-21
X5330413P13Rik	491.318311	7.620755701	0.773891394	9.847319356	7.04E-23	8.05E-21
Glis3	113.4291252	-4.7778389	0.48555056	-9.840044042	7.57E-23	8.61E-21
Hr	1197.511664	5.998941786	0.610242393	9.830424522	8.33E-23	9.43E-21
Inpp4b	496.5524515	3.149008769	0.320399698	9.82837622	8.50E-23	9.59E-21
X1700119H24Rik	53.05910636	8.534781606	0.868603059	9.825871	8.71E-23	9.78E-21
LOC108167653	19.51881594	3.968107726	0.404410396	9.8120814	9.99E-23	1.11E-20
X2700038G22Rik	109.3492576	-2.408417946	0.245447724	-9.812345826	9.96E-23	1.11E-20
Gramd3	136.0242634	-1.952685203	0.199477312	-9.789009011	1.26E-22	1.39E-20
Gm32392	121.5566366	3.794643696	0.387971808	9.780720195	1.36E-22	1.50E-20
Cers4	3744.73299	2.876238718	0.294085162	9.780291858	1.37E-22	1.50E-20
Nedd9	646.6408704	-2.875430044	0.294086186	-9.777508043	1.41E-22	1.54E-20
Akain1	147.7089129	6.190234169	0.633377005	9.773380032	1.46E-22	1.59E-20
Elfn2	647.3400538	5.152958322	0.528982088	9.741271841	2.01E-22	2.18E-20
Ephb4	343.9582115	-3.921166837	0.402586898	-9.73992661	2.04E-22	2.20E-20
Tbc1d8	3697.688327	4.167673085	0.429222396	9.709822056	2.74E-22	2.94E-20
Shroom4	226.0343819	-3.191786105	0.329446676	-9.688323904	3.38E-22	3.62E-20
Gabrr3	302.8176152	7.597466774	0.784976944	9.678585885	3.72E-22	3.96E-20
Mak	4364.792263	4.966913791	0.514081516	9.661724137	4.38E-22	4.65E-20
Dnaja4	872.9247655	3.48301443	0.360712126	9.655939408	4.64E-22	4.90E-20
Ltbp1	544.448641	-3.447152886	0.357026984	-9.655160646	4.67E-22	4.92E-20
A930003A15Rik	1905.929731	7.825733278	0.810826231	9.651554159	4.84E-22	5.07E-20
Mef2d	7271.966734	3.145644361	0.326233098	9.642321341	5.30E-22	5.53E-20
LOC108168108	94.19983725	4.664891525	0.484305174	9.632132323	5.85E-22	6.08E-20
Gm12315	31.99884964	2.22618074	0.231309565	9.624248523	6.32E-22	6.53E-20
LOC108167909	67.45491574	7.491083429	0.778411212	9.623555406	6.36E-22	6.55E-20
Lrit1	6350.553246	8.298767898	0.863144511	9.614575303	6.94E-22	7.12E-20
Zbtb4	2847.39848	3.963141653	0.412876957	9.598844369	8.08E-22	8.26E-20
Gfap	208.7799063	3.699740915	0.385678525	9.592810267	8.57E-22	8.72E-20
Gm30266	67.54539844	6.531679782	0.680943659	9.592100156	8.63E-22	8.75E-20
Sebox	347.6738689	10.88207559	1.135521544	9.583328161	9.40E-22	9.48E-20
Cyba	56.63170493	-2.260507402	0.236908257	-9.54169951	1.41E-21	1.41E-19
Gm11342	223.9840006	9.210051816	0.965735012	9.536831218	1.47E-21	1.47E-19
Rp1l1	9716.9654	8.279251637	0.86926657	9.524410488	1.66E-21	1.66E-19
Mthfd2	313.7012444	-2.293340102	0.240982648	-9.516619234	1.79E-21	1.78E-19
Tfec	10.58181208	-7.022874007	0.738723781	-9.50676584	1.97E-21	1.95E-19
Rbp3	100819.7787	7.59494376	0.79897076	9.505909532	1.98E-21	1.95E-19
X2810442N19Rik	64.83468902	3.727827003	0.392380484	9.500541323	2.09E-21	2.05E-19
BC029214	884.5355312	3.268490843	0.344991945	9.474107701	2.69E-21	2.63E-19
Arhgef33	72.93309274	2.327942333	0.245821064	9.470068574	2.80E-21	2.72E-19
Gyltl1b	25.84747005	-4.286664418	0.453007806	-9.46267231	3.00E-21	2.91E-19
Gm34204	208.7392532	9.787151713	1.034659775	9.45929469	3.10E-21	3.00E-19
Galnt12	49.09188293	-4.277168857	0.452746718	-9.44715597	3.48E-21	3.35E-19
Rdh12	6872.301845	7.692162374	0.816614377	9.419577449	4.53E-21	4.34E-19
Crabp2	879.171096	-5.787009821	0.61453468	-9.416897054	4.65E-21	4.44E-19
Agpat9	71.80339466	3.272072873	0.347846169	9.406666415	5.12E-21	4.87E-19
Ankrd35	119.4206398	5.550924993	0.590296523	9.403621357	5.27E-21	5.00E-19
Ypel2	3847.875073	2.72749583	0.290120611	9.401248063	5.39E-21	5.09E-19
Ryr2	1203.181563	3.377641745	0.359834125	9.386663225	6.19E-21	5.83E-19
Gsg1l2	100.1129174	7.634576778	0.813673335	9.382852364	6.42E-21	6.02E-19
LOC102639040	124.6639968	4.059953369	0.432849058	9.379605409	6.62E-21	6.18E-19
Gas6	2404.441846	4.972860663	0.530251966	9.378297448	6.70E-21	6.24E-19
Isyna1	426.4036049	-3.06696965	0.327119584	-9.375683404	6.87E-21	6.37E-19
Pnpla3	1194.40663	4.294177894	0.458138356	9.37310277	7.04E-21	6.50E-19
Ccdc126	4069.713211	5.676142912	0.605860189	9.368733932	7.34E-21	6.75E-19
Itga5	200.2225524	-2.99587018	0.320198566	-9.356288561	8.26E-21	7.57E-19
Fbxl20	3027.408411	0.862723465	0.092333067	9.343602402	9.31E-21	8.50E-19
Ackr3	148.2523781	-4.533897611	0.48584934	-9.331900324	1.04E-20	9.43E-19
Tdrd9	549.9494452	3.417329597	0.366201907	9.331818128	1.04E-20	9.43E-19
Gm31221	30.23752453	7.381958287	0.791328714	9.328561132	1.07E-20	9.69E-19
Ppara	496.4528486	5.508294689	0.590564967	9.32716127	1.09E-20	9.79E-19
Alas2	101.7630434	-3.497578674	0.375062576	-9.325320359	1.11E-20	9.92E-19
Fscn2	1228.79695	7.328616277	0.786568163	9.317204307	1.19E-20	1.07E-18
Gm41263	350.1921119	6.321395554	0.67869651	9.31402396	1.23E-20	1.10E-18
Pus7	590.8060773	-1.575677733	0.169278983	-9.308171069	1.30E-20	1.15E-18
Gm16432	98.4882832	5.096233123	0.548092195	9.298131171	1.43E-20	1.26E-18
Bche	258.5546047	-2.893415559	0.311250988	-9.296084734	1.46E-20	1.28E-18
Polr1a	1286.750554	-1.458342637	0.156872611	-9.296349622	1.45E-20	1.28E-18
Mmd2	1159.798344	5.586580126	0.601031117	9.29499316	1.47E-20	1.29E-18
Asic3	402.4722817	3.623166121	0.389969538	9.290895226	1.53E-20	1.33E-18
Egflam	9428.849881	5.169074712	0.556944106	9.281137285	1.68E-20	1.46E-18
Gm38405	34.40057408	4.734403624	0.510934263	9.266169774	1.93E-20	1.67E-18
Prss33	44.094778	4.411130884	0.476179185	9.263594519	1.98E-20	1.70E-18
Gm26670	22.39318073	7.664998466	0.82802741	9.256938082	2.10E-20	1.81E-18
Lrit2	3238.983713	7.381656306	0.797709618	9.253563123	2.17E-20	1.86E-18
Col17a1	525.2149594	4.129125668	0.446443921	9.248923489	2.27E-20	1.94E-18
S100b	114.6929931	5.715986807	0.618814573	9.236994505	2.54E-20	2.16E-18
Gm17021	161.4565943	4.469976521	0.484428052	9.227327981	2.77E-20	2.35E-18
Wfdc2	51.18194286	-4.072744968	0.441421672	-9.226427309	2.80E-20	2.36E-18
Irs4	137.9171156	-4.865505086	0.527580483	-9.22229923	2.91E-20	2.45E-18
Nkd2	83.78736931	-2.978198494	0.32302875	-9.219608131	2.98E-20	2.50E-18
Pdzph1	1976.130061	11.12162643	1.206568995	9.217563583	3.04E-20	2.54E-18
Gm41608	96.02391443	6.373059713	0.692047323	9.208994101	3.29E-20	2.74E-18
A830019P07Rik	41.37885085	5.993231844	0.650916543	9.207373681	3.34E-20	2.78E-18
Lef1	89.85464406	-3.186348326	0.346704295	-9.190391838	3.91E-20	3.24E-18
Rtbdn	5287.517046	7.394525963	0.804722295	9.188916491	3.97E-20	3.28E-18
Nup43	302.1993644	-2.145590832	0.23359155	-9.185224513	4.11E-20	3.38E-18
Dusp9	257.0208027	-7.333419552	0.798806951	-9.18046537	4.29E-20	3.52E-18
BC067074	150.503907	-2.778434227	0.302779472	-9.176428656	4.46E-20	3.64E-18
Gm15411	125.8167707	4.638791589	0.506057945	9.166522605	4.89E-20	3.98E-18
A730036I17Rik	25.41194599	4.181878107	0.456538873	9.159960632	5.19E-20	4.22E-18
Dscaml1	2809.565901	4.892462863	0.534525098	9.152915138	5.54E-20	4.49E-18
Nwd1	409.8408735	4.605635395	0.503228731	9.152170989	5.58E-20	4.50E-18
Lrrc2	383.6211348	7.9376028	0.86791539	9.145595175	5.93E-20	4.77E-18
Crybb1	250.0701956	-6.222626061	0.680815364	-9.139961269	6.25E-20	5.01E-18
Klc3	1600.986764	6.021335349	0.659490791	9.130279655	6.83E-20	5.46E-18
Neurl1a	854.470765	2.610883931	0.286129405	9.124836132	7.18E-20	5.72E-18
Slc6a2	200.4770852	5.885612985	0.645414472	9.119121502	7.57E-20	6.01E-18
Asic4	396.172818	3.888938932	0.42707272	9.106034523	8.54E-20	6.76E-18
Gm9548	202.3715052	5.24415342	0.576099377	9.102862513	8.80E-20	6.94E-18
Lpcat2	821.2431592	3.757850314	0.412879965	9.101556454	8.90E-20	7.00E-18
Gem	335.7411524	3.764398664	0.413634198	9.100791679	8.97E-20	7.03E-18
Dmxl2	11714.61429	2.835886706	0.311728531	9.09729595	9.26E-20	7.24E-18
Fxyd1	153.1847006	2.789917042	0.307045502	9.086330928	1.02E-19	7.98E-18
Eya2	232.3745899	-3.729645912	0.411807896	-9.056761534	1.34E-19	1.04E-17
Car2	8577.969953	4.149074235	0.458331641	9.052559038	1.40E-19	1.08E-17
Slc6a9	2214.606667	3.487827543	0.385519207	9.047091507	1.47E-19	1.13E-17
Kif9	547.7043165	4.867694233	0.538180373	9.044726407	1.50E-19	1.15E-17
X4930538K18Rik	57.84069896	1.797678764	0.198856548	9.04007828	1.57E-19	1.19E-17
Gm14268	431.8094497	10.51121288	1.162732187	9.040097968	1.57E-19	1.19E-17
Ccnd2	1088.467664	-4.794062715	0.5303162	-9.040008043	1.57E-19	1.19E-17
Vwc2l	171.5394758	6.614114011	0.731939309	9.036424096	1.62E-19	1.23E-17
Gm40818	7.111533031	-6.064335231	0.671138088	-9.03589788	1.63E-19	1.23E-17
Gm42007	25.67213308	3.970045739	0.439666996	9.029665123	1.72E-19	1.30E-17
Bmp3	223.913885	3.928125041	0.435613602	9.017452668	1.93E-19	1.45E-17
Mapkapk3	39.31531023	-2.568251617	0.284892202	-9.014818932	1.97E-19	1.48E-17
Sncb	1843.646427	6.394196736	0.70987911	9.00744457	2.11E-19	1.58E-17
Carnmt1	330.5620149	-1.756530153	0.195315388	-8.993301392	2.40E-19	1.79E-17
Npy	197.3492972	6.163916307	0.68558921	8.990684535	2.46E-19	1.83E-17
Tpm2	79.86422846	-2.333453964	0.259735107	-8.983976	2.61E-19	1.94E-17
Bcas3	842.1172038	1.144852438	0.1275266	8.977361895	2.77E-19	2.05E-17
X4930426D05Rik	10.39630208	-4.839018512	0.539497325	-8.969494909	2.98E-19	2.20E-17
Cebpg	1315.90444	-1.347708584	0.150335539	-8.964670603	3.11E-19	2.29E-17
Rftn1	107.0115051	-3.05105187	0.340439901	-8.962086594	3.19E-19	2.34E-17
Crybb3	335.4385862	-5.828284078	0.650805035	-8.955499364	3.38E-19	2.47E-17
LOC102639645	377.7505777	5.667243538	0.633015995	8.952765148	3.47E-19	2.53E-17
Sema7a	1023.079296	3.077313843	0.343808296	8.950667793	3.53E-19	2.57E-17
Gja1	974.9220495	-5.001703717	0.559241868	-8.943721847	3.76E-19	2.73E-17
Ttyh2	3653.217869	4.334055915	0.485003159	8.93613956	4.03E-19	2.91E-17
Dlc1	4557.929352	3.591034173	0.402245098	8.927477774	4.36E-19	3.14E-17
Gm34166	333.306645	11.18062902	1.253050166	8.922730565	4.55E-19	3.27E-17
Plin3	217.5489791	-3.055183706	0.342506225	-8.920082282	4.66E-19	3.34E-17
Klhl18	4907.097	3.635157761	0.408620312	8.896174903	5.78E-19	4.13E-17
Reep6	11606.85276	6.938611688	0.780039545	8.895205035	5.83E-19	4.15E-17
Dse	192.7566818	-3.392747506	0.381454419	-8.894240927	5.88E-19	4.18E-17
Grm6	1180.121952	10.89585774	1.225388708	8.891756284	6.02E-19	4.26E-17
Sesn1	2078.186813	1.573440635	0.177058553	8.886555348	6.30E-19	4.45E-17
Sall1	131.2001152	-2.894913387	0.326248039	-8.873351085	7.10E-19	5.00E-17
LOC102636393	52.84794277	5.200368119	0.586241054	8.870699322	7.27E-19	5.10E-17
Setd5	5472.718775	-0.715032847	0.080627416	-8.868358701	7.42E-19	5.20E-17
Nme5	339.5665132	5.041267326	0.569340427	8.854574679	8.40E-19	5.87E-17
Atp1a3	40361.56674	5.608676641	0.634782512	8.835587838	9.96E-19	6.93E-17
LOC108168036	49.47383007	3.625716175	0.410511138	8.832199279	1.03E-18	7.13E-17
Pcdhb15	120.5506664	2.934489875	0.33242165	8.827613588	1.07E-18	7.38E-17
Dock9	1395.948393	2.211793231	0.25054728	8.827847699	1.07E-18	7.38E-17
Crebrf	1889.240279	1.58512396	0.179571347	8.827265531	1.07E-18	7.39E-17
Gm39114	4.347052685	-3.263019432	0.371025064	-8.794606476	1.44E-18	9.86E-17
Ccdc17	91.85817465	2.078117117	0.236463459	8.788322411	1.52E-18	1.04E-16
Grhl1	113.6179983	3.115088039	0.354616576	8.784383601	1.57E-18	1.07E-16
Gm33195	134.8439194	3.662405013	0.417071251	8.781245414	1.62E-18	1.10E-16
Gm32151	50.82217447	3.124328442	0.35612543	8.77311245	1.74E-18	1.18E-16
Kcnj6	98.71153864	7.416510044	0.845320166	8.773610694	1.73E-18	1.18E-16
Ajuba	553.0486962	-3.488719047	0.397664592	-8.773019055	1.74E-18	1.18E-16
Parp10	108.5359257	3.845682307	0.438574436	8.768596591	1.81E-18	1.22E-16
Myc	142.9917727	-4.129207976	0.471453568	-8.758461609	1.98E-18	1.33E-16
Gm12082	4.245338015	-4.840789253	0.552846956	-8.75611089	2.02E-18	1.35E-16
Klf9	1795.883225	4.973625918	0.568058126	8.755487668	2.03E-18	1.36E-16
Opn1mw	744.4255888	13.24494039	1.512908068	8.754623413	2.05E-18	1.36E-16
Rorc	202.571881	3.663235478	0.418615737	8.750830775	2.12E-18	1.41E-16
Gm15327	23.52763389	4.131700245	0.472358957	8.746950148	2.19E-18	1.45E-16
Tlcd2	20.61390338	-3.068852676	0.350879694	-8.746167786	2.21E-18	1.46E-16
Cadm2	11664.20978	4.585948003	0.524971769	8.735608797	2.42E-18	1.60E-16
Vmn2r2	11.4189067	-4.444346866	0.509005074	-8.73143922	2.51E-18	1.65E-16
Tcf24	89.32951327	3.324047817	0.380800633	8.72910265	2.57E-18	1.68E-16
Gm34605	72.28270025	6.415589265	0.735342419	8.724628285	2.67E-18	1.74E-16
Ankrd33b	12299.59896	4.534517247	0.519746284	8.724482278	2.67E-18	1.74E-16
Rpgrip1	14037.5696	5.744802455	0.65864656	8.722132327	2.73E-18	1.78E-16
X4930595L18Rik	125.1748666	10.12903913	1.161759385	8.718706522	2.81E-18	1.83E-16
Trpm2	123.2714515	2.736077492	0.313839887	8.718068048	2.83E-18	1.83E-16
Trib2	6567.848853	2.185422039	0.25081913	8.713139369	2.96E-18	1.91E-16
Clip4	1185.499341	1.875437599	0.215376926	8.70769974	3.10E-18	2.00E-16
Pabpc4l	79.8268907	-3.714895716	0.426875225	-8.702532964	3.25E-18	2.07E-16
Cdkl2	607.4517244	4.463702982	0.51290567	8.702775663	3.24E-18	2.07E-16
C1ql3	770.1288477	4.20671253	0.483370657	8.702871127	3.24E-18	2.07E-16
Gypa	22.00051849	-6.678797204	0.767649743	-8.700318422	3.31E-18	2.10E-16
Egfem1	260.9365064	-4.259972516	0.489635175	-8.700299187	3.31E-18	2.10E-16
Mfap3l	1255.173425	2.847201046	0.327252756	8.700311884	3.31E-18	2.10E-16
Prss38	81.60849158	4.246981536	0.488173578	8.69973659	3.33E-18	2.10E-16
Gm30068	273.5714536	8.102034374	0.931909384	8.694015226	3.50E-18	2.21E-16
Atp6v0b	2099.448835	2.335973681	0.26887613	8.687917675	3.69E-18	2.32E-16
Carm1	1229.404238	-1.39668853	0.160801512	-8.685792266	3.76E-18	2.36E-16
Uckl1os	687.5491646	6.0178381	0.693055012	8.683059784	3.85E-18	2.41E-16
Zfp493	99.5288373	-1.854706416	0.213678765	-8.679881776	3.96E-18	2.48E-16
Ttpa	13.04045904	-3.626005107	0.417858664	-8.677587474	4.04E-18	2.52E-16
Fbxo2	103.1096911	4.350828127	0.501688571	8.672368436	4.23E-18	2.63E-16
Abca1	2161.116473	3.405887446	0.39291035	8.668357665	4.38E-18	2.72E-16
Mapk9	3553.048532	0.972446965	0.112194956	8.667474895	4.42E-18	2.73E-16
Cpne6	393.0237043	6.628155202	0.76520036	8.661986514	4.64E-18	2.86E-16
Zic3	354.9023577	-3.759756786	0.434092374	-8.66119059	4.67E-18	2.87E-16
Gramd2	778.5623354	6.98955427	0.807175305	8.659276649	4.75E-18	2.92E-16
H2.K2	87.40631069	5.081172235	0.587506371	8.648710019	5.21E-18	3.19E-16
Msantd4	1959.48057	-0.442279633	0.051145093	-8.647547656	5.26E-18	3.21E-16
Gp1ba	110.636945	1.586866279	0.183510879	8.647259993	5.28E-18	3.22E-16
Tfap2e	106.5335392	7.550024096	0.873596465	8.642461817	5.50E-18	3.34E-16
Adamts9	254.1747141	-4.699742118	0.543812904	-8.642204119	5.51E-18	3.34E-16
Cerkl	790.0036678	4.73544437	0.548004362	8.641253061	5.56E-18	3.36E-16
Mecom	238.8530872	-4.841890527	0.561278779	-8.626534094	6.32E-18	3.81E-16
Myo15b	37.80057219	4.309516901	0.499562244	8.626586479	6.32E-18	3.81E-16
Pnp	491.699534	-2.231973216	0.258762901	-8.625553387	6.38E-18	3.83E-16
Scamp1	5710.300187	2.478961703	0.287419968	8.624876404	6.42E-18	3.84E-16
Crlf2	65.80865855	3.532677171	0.409619127	8.62429739	6.45E-18	3.86E-16
Tmem255b	80.24495995	5.870962489	0.681044119	8.620531806	6.66E-18	3.97E-16
Tcf7	148.5455779	-2.730656036	0.316916854	-8.616316872	6.91E-18	4.11E-16
Prss56	88.94535972	5.319713895	0.617621406	8.613227852	7.10E-18	4.22E-16
Gm30198	70.52407655	9.301643465	1.081206905	8.603018921	7.76E-18	4.60E-16
Pde8b	1997.837063	4.326561247	0.503003169	8.60145922	7.87E-18	4.65E-16
Scube1	224.6170558	-4.151631983	0.482741705	-8.600110447	7.96E-18	4.69E-16
X4930429P21Rik	42.13859399	3.893750792	0.452832104	8.598663288	8.06E-18	4.74E-16
Abca8a	1382.044964	12.18693689	1.41858336	8.590920512	8.63E-18	5.06E-16
Gm32442	40.93089615	6.520460311	0.75985606	8.581178268	9.39E-18	5.50E-16
Rasgef1a	182.0121575	4.529217723	0.527848432	8.580527008	9.44E-18	5.51E-16
Clca1	69.86847392	7.521999974	0.877757796	8.569562136	1.04E-17	6.05E-16
Mob3a	349.8779456	-1.745875496	0.203838828	-8.564980061	1.08E-17	6.28E-16
Gm36677	173.9896134	4.55307016	0.531608365	8.564707524	1.08E-17	6.28E-16
Lman1l	173.7849386	3.766638175	0.439835244	8.56374796	1.09E-17	6.32E-16
Bmpr1b	443.7346767	-2.85318458	0.333320986	-8.559870822	1.13E-17	6.52E-16
Tsnaxip1	47.44532666	1.781966486	0.2083864	8.55126097	1.22E-17	7.01E-16
Phyhd1	985.5494142	2.923243873	0.341983943	8.54789804	1.25E-17	7.18E-16
Pex5l	6971.698636	5.267648332	0.616244508	8.547984227	1.25E-17	7.18E-16
Strip2	761.0068041	5.090162091	0.595693437	8.544935657	1.29E-17	7.35E-16
LOC108167440	365.4874429	-4.302451206	0.503594229	-8.543487903	1.30E-17	7.43E-16
Nrtn	226.4972496	10.26143476	1.201624934	8.539632022	1.35E-17	7.66E-16
Psd	2511.609138	4.61788607	0.540901086	8.537394706	1.37E-17	7.80E-16
Gabrd	142.6274037	6.805248541	0.797319849	8.535155055	1.40E-17	7.93E-16
Wdr17	5051.198108	5.157364507	0.604350752	8.533727287	1.42E-17	8.01E-16
Frrs1	119.830525	-3.170444689	0.371712752	-8.529286852	1.47E-17	8.30E-16
Iffo1	953.7164616	1.311422729	0.153832878	8.524983376	1.53E-17	8.60E-16
Gm626	3976.903339	6.193884581	0.726649849	8.523891648	1.54E-17	8.66E-16
Ifitm2	169.4440736	-3.695009087	0.433799696	-8.517777037	1.63E-17	9.11E-16
Terb1	79.7852668	2.349782657	0.27597933	8.514342933	1.68E-17	9.36E-16
Gm34353	39.45284816	3.296733854	0.387334779	8.511329307	1.72E-17	9.59E-16
A630089N07Rik	128.9174848	-1.57736233	0.185531245	-8.501868958	1.87E-17	1.04E-15
Ppp1r13b	1351.809398	2.443269864	0.287443206	8.500009081	1.90E-17	1.05E-15
Abcb9	207.9536368	3.998037874	0.470373722	8.499704992	1.90E-17	1.05E-15
Lamp5	522.4228108	5.884087992	0.692460079	8.497367823	1.94E-17	1.07E-15
Acsl6	5439.920248	3.070343493	0.361435183	8.494866133	1.98E-17	1.09E-15
X3110045C21Rik	17.67516694	-2.566471013	0.302136462	-8.494410087	1.99E-17	1.09E-15
Stat3	956.348616	1.562722994	0.184009308	8.492630113	2.02E-17	1.11E-15
Hykk	128.6916023	-1.481811707	0.174601491	-8.486821591	2.12E-17	1.16E-15
Park2	175.5960201	2.978392598	0.350983275	8.485853346	2.14E-17	1.17E-15
Gm32576	112.0350212	5.31500604	0.62656197	8.482809827	2.20E-17	1.20E-15
Gm34375	24.21809125	5.361392386	0.632322767	8.478885566	2.27E-17	1.24E-15
Tnfrsf8	73.25777857	8.273882291	0.976128193	8.476225097	2.33E-17	1.26E-15
Rasef	132.1676495	-3.019419029	0.356242392	-8.475743194	2.34E-17	1.27E-15
Ak2	989.4905417	-1.634154283	0.192863506	-8.473113005	2.39E-17	1.29E-15
X4921504A21Rik	130.0409751	2.940011454	0.347096546	8.470298789	2.45E-17	1.32E-15
Unc119	30139.76179	5.433042696	0.641471934	8.469649885	2.46E-17	1.33E-15
Samd15	96.46025941	2.98217996	0.352380964	8.462942855	2.61E-17	1.40E-15
Gm39178	16.96190039	-3.674531308	0.43494939	-8.448181316	2.96E-17	1.59E-15
Cutal	104.9721034	8.101331321	0.959060473	8.447153799	2.98E-17	1.60E-15
Gm20544	291.4837538	1.563928678	0.185188566	8.44506068	3.04E-17	1.62E-15
Egr1	2342.765963	6.361775372	0.753473009	8.443269092	3.09E-17	1.64E-15
Grb10	11517.65783	-3.424750367	0.405971904	-8.435929514	3.29E-17	1.75E-15
Esrrb	4056.451872	7.414916665	0.879486676	8.430959635	3.43E-17	1.82E-15
Lurap1l	674.2684598	3.402352804	0.403956232	8.422577837	3.68E-17	1.95E-15
C2cd2l	6746.431579	4.570082785	0.542658722	8.421651768	3.71E-17	1.96E-15
Susd1	49.50380026	-3.667930024	0.435615467	-8.420109704	3.76E-17	1.98E-15
BB283400	1599.086415	5.559807763	0.660500678	8.417565563	3.84E-17	2.02E-15
Bicc1	132.0153363	-1.909184509	0.226829127	-8.416840166	3.87E-17	2.03E-15
Gm29868	88.54125289	4.599203695	0.546593978	8.414296312	3.95E-17	2.07E-15
X2410016O06Rik	73.36810843	-1.459301577	0.17343915	-8.41391104	3.97E-17	2.07E-15
BC051142	123.0324722	1.816298032	0.215921	8.411863767	4.04E-17	2.10E-15
LOC102632901	32.16331273	2.818617779	0.335129846	8.410524503	4.08E-17	2.12E-15
Gm5460	63.24646533	8.786658786	1.045369419	8.405314551	4.27E-17	2.21E-15
Arhgdia	2606.804806	-1.947072505	0.231652374	-8.405148055	4.27E-17	2.21E-15
Pop1	314.3468059	-1.877452049	0.223433328	-8.402739503	4.36E-17	2.26E-15
Hyal2	298.8644253	-2.345613606	0.27919515	-8.40134081	4.41E-17	2.28E-15
Gm32355	55.00422135	5.898924947	0.702350408	8.398834654	4.51E-17	2.32E-15
H2.D1	386.5327465	1.484099137	0.176724657	8.397804597	4.55E-17	2.34E-15
Slc9a7	1729.371551	3.136613308	0.373606286	8.395504638	4.64E-17	2.37E-15
Ubap1l	2561.160498	4.755703905	0.566451621	8.395604728	4.64E-17	2.37E-15
Scg2	2155.967958	5.600492322	0.667256929	8.393307105	4.73E-17	2.41E-15
Stab2	30.85831902	4.059317745	0.484880864	8.371783759	5.68E-17	2.89E-15
Abcg1	1967.423504	2.824754738	0.33791138	8.3594543	6.30E-17	3.21E-15
E130218I03Rik	619.0687094	5.390672558	0.645032641	8.357208946	6.42E-17	3.26E-15
Dcaf12l2	35.19335306	-4.352836653	0.521470678	-8.34723185	6.99E-17	3.54E-15
Gm32705	33.53705438	7.515470656	0.900587814	8.34507256	7.12E-17	3.60E-15
Zer1	2128.92182	1.086169535	0.130260191	8.338461093	7.53E-17	3.80E-15
Rgs9bp	7828.234541	6.478313306	0.777046391	8.337099798	7.61E-17	3.83E-15
Rcl1	454.860575	-1.395081627	0.167386319	-8.334502084	7.78E-17	3.91E-15
Gm13269	388.9556814	6.2367837	0.748418287	8.333286092	7.86E-17	3.94E-15
Mb21d2	655.8722794	-1.526396276	0.183216589	-8.33110302	8.01E-17	4.01E-15
Rab11fip1	105.6749317	-1.778723628	0.213606999	-8.327084958	8.29E-17	4.14E-15
Ctps	1375.327852	-1.561770553	0.187807061	-8.315824479	9.11E-17	4.54E-15
Lnp1	152.5809971	5.029399336	0.604838457	8.315277043	9.15E-17	4.55E-15
Gm10421	9.434959921	-5.691632069	0.684613379	-8.313644236	9.28E-17	4.61E-15
Hk3	17.10075289	-3.280712837	0.394640141	-8.313175716	9.32E-17	4.62E-15
Plau	14.49351715	-2.743034103	0.33011879	-8.309233483	9.63E-17	4.76E-15
Igf2bp2	1664.439018	-3.314901983	0.399014552	-8.307722035	9.76E-17	4.82E-15
Tbc1d2b	380.6150568	-1.343685742	0.161756057	-8.306865104	9.83E-17	4.84E-15
Ppp1r1b	53.84676062	4.899398437	0.58987888	8.305770219	9.92E-17	4.88E-15
Timp1	15.52786848	-2.537951253	0.305751997	-8.300685767	1.04E-16	5.08E-15
Mfsd12	640.0241301	2.386773914	0.287560996	8.300061381	1.04E-16	5.10E-15
Gm36012	30.63180825	3.177590534	0.382858516	8.299646994	1.04E-16	5.10E-15
Hhipl1	42.12852665	-2.172616258	0.261848918	-8.297213032	1.07E-16	5.20E-15
X9430041J12Rik	148.9389747	3.202435247	0.386055736	8.295266575	1.08E-16	5.27E-15
Cpne1	1385.008158	-1.216975919	0.146731877	-8.293875515	1.10E-16	5.33E-15
Hbb.bh1	1205.848934	-16.60717426	2.002467905	-8.293353524	1.10E-16	5.34E-15
Zc3h6	476.6592669	1.52331193	0.183775403	8.288987036	1.14E-16	5.53E-15
Proser2	581.7068985	4.196583606	0.506298021	8.288761622	1.14E-16	5.53E-15
Slit3	22.49308325	-3.398763558	0.410057688	-8.288500997	1.15E-16	5.53E-15
Gm12781	75.34747122	1.463568361	0.176618735	8.28659744	1.17E-16	5.61E-15
Synj1	5247.233765	2.405887382	0.290506929	8.281686742	1.21E-16	5.83E-15
Cacnb2	2516.817162	4.684231475	0.56581426	8.27874412	1.24E-16	5.97E-15
Abhd3	409.6398527	3.031647522	0.366339268	8.275518864	1.28E-16	6.12E-15
Bcan	62.64951369	4.288793081	0.518327861	8.27428623	1.29E-16	6.17E-15
Gpr162	2100.828918	1.46230227	0.17678241	8.271763417	1.32E-16	6.29E-15
Gramd1b	6749.606525	3.863169973	0.467158727	8.269501876	1.35E-16	6.40E-15
Gm19426	28.15888635	-2.819550012	0.341141803	-8.26503813	1.40E-16	6.62E-15
Cntn2	955.3835595	-4.275724246	0.517328416	-8.26500945	1.40E-16	6.62E-15
Hist1h1c	442.900887	4.481412811	0.542348132	8.262981927	1.42E-16	6.72E-15
Ppp1r42	305.6406783	5.649590919	0.683751727	8.262634959	1.42E-16	6.73E-15
Gm12339	61.84895764	3.569975442	0.43218459	8.260302492	1.45E-16	6.83E-15
X5930430L01Rik	449.355611	3.085711695	0.373550716	8.260489305	1.45E-16	6.83E-15
Snta1	958.3942082	4.196733146	0.508157868	8.258719204	1.47E-16	6.91E-15
Chsy3	29.81756489	-2.278347817	0.275887111	-8.258261166	1.48E-16	6.93E-15
Mogat2	25.14957082	-5.959537922	0.722037396	-8.253780138	1.53E-16	7.18E-15
Zfp248	328.1604722	-0.617510665	0.074817282	-8.253583284	1.54E-16	7.18E-15
Ap1s3	48.6724905	-2.176521209	0.263738092	-8.252585722	1.55E-16	7.21E-15
LOC108168112	148.9083055	5.847196217	0.708525045	8.252631657	1.55E-16	7.21E-15
Lin28b	423.5638156	-4.762641689	0.57712086	-8.252416475	1.55E-16	7.21E-15
X6430571L13Rik	683.9806748	4.210127851	0.510669278	8.244333529	1.66E-16	7.70E-15
Elavl1	3027.936939	-0.882680278	0.107087583	-8.242601561	1.69E-16	7.79E-15
Zfp654	4398.820637	2.188432051	0.265547038	8.241221834	1.70E-16	7.87E-15
Foxg1	71.29402911	-3.070761261	0.373264876	-8.226761903	1.92E-16	8.86E-15
Trabd2b	21.47542335	-2.851930876	0.346804725	-8.223448725	1.98E-16	9.09E-15
Wisp1	475.8551142	5.248134	0.638277419	8.222340074	2.00E-16	9.16E-15
Rbm20	471.9187762	2.440865773	0.297026621	8.21766671	2.08E-16	9.51E-15
Idi1	386.0852544	-1.767521935	0.215581261	-8.198866299	2.43E-16	1.11E-14
Lhfpl3	1157.033087	4.347376955	0.530796129	8.190295144	2.61E-16	1.19E-14
X3110062M04Rik	30.3615943	-1.281112175	0.156567587	-8.182486575	2.78E-16	1.27E-14
Ptgds	212.2638361	4.688138084	0.573155734	8.179518776	2.85E-16	1.30E-14
Hba.a1	221.618158	-5.157659835	0.630590309	-8.179097843	2.86E-16	1.30E-14
Krt24	38.78562312	6.217426412	0.76023471	8.178298537	2.88E-16	1.30E-14
X4930570G19Rik	265.392563	2.6664813	0.326176664	8.174960357	2.96E-16	1.34E-14
Pias3	5119.480035	2.982061907	0.3649591	8.170948209	3.06E-16	1.38E-14
Dnmt3b	404.8488838	-3.503279302	0.429209997	-8.16215681	3.29E-16	1.48E-14
Bmp15	75.51705998	5.881045844	0.720826652	8.158751941	3.39E-16	1.52E-14
Enpp2	715.1714797	2.84083803	0.348332462	8.155536278	3.48E-16	1.56E-14
Gm34935	24.40067567	4.368532032	0.535692172	8.154929758	3.49E-16	1.57E-14
Necab1	645.0028553	4.676633844	0.573790806	8.150416136	3.63E-16	1.62E-14
Ubqln4	2279.464973	-0.949525932	0.11650979	-8.14975235	3.65E-16	1.63E-14
Gm40860	119.151152	8.974819094	1.102024512	8.143937811	3.83E-16	1.71E-14
Snord14d	4.053578486	-2.557834124	0.314219284	-8.140283733	3.94E-16	1.76E-14
Napb	3309.297917	3.138752783	0.385660525	8.138641581	4.00E-16	1.78E-14
Dnah9	443.707597	4.385193852	0.539012207	8.135611389	4.10E-16	1.82E-14
Smco4	45.53012724	-3.060367373	0.376256538	-8.133725444	4.16E-16	1.84E-14
X2810004N23Rik	443.7017482	-1.780820764	0.218997014	-8.131712522	4.23E-16	1.87E-14
Fam214a	1916.579538	1.861667618	0.229052524	8.127688738	4.38E-16	1.93E-14
Nrn1l	63.44088136	4.159284354	0.51180475	8.126701344	4.41E-16	1.94E-14
Osbp2	8039.766334	6.745981534	0.830132555	8.126390768	4.42E-16	1.94E-14
Cnga4	38.27976603	1.708280695	0.210333967	8.121753791	4.59E-16	2.01E-14
Gm20139	439.9543156	10.18718451	1.254304734	8.121777934	4.59E-16	2.01E-14
Smtnl2	46.77702612	-3.023370011	0.372311988	-8.120528226	4.64E-16	2.03E-14
Slc12a7	553.2449657	-2.844323032	0.350439061	-8.116455471	4.80E-16	2.10E-14
Tph1	64.87110259	5.260847809	0.648583295	8.111290942	5.01E-16	2.18E-14
Gm31313	16.23834712	4.171897066	0.514349052	8.11102315	5.02E-16	2.18E-14
Klk8	13.4935596	-3.490674757	0.430439503	-8.109559486	5.08E-16	2.21E-14
Ctsf	5115.857623	2.725584461	0.336117793	8.109015696	5.10E-16	2.21E-14
Agt	62.06106693	6.914812657	0.852990976	8.106548432	5.21E-16	2.25E-14
Gckr	251.0501737	5.961186451	0.735413589	8.105896524	5.24E-16	2.26E-14
Mtm1	313.7612949	1.404083118	0.173219988	8.105780008	5.24E-16	2.26E-14
Prrx1	60.35669672	-4.220846289	0.520740125	-8.105475439	5.25E-16	2.26E-14
LOC108167979	50.54522823	4.160724337	0.513447719	8.103501456	5.34E-16	2.30E-14
Egf	108.6247122	1.26699218	0.15641552	8.100169199	5.49E-16	2.35E-14
Fgf11	1150.380889	2.179769485	0.269149311	8.09873701	5.55E-16	2.38E-14
AI427809	39.36173233	5.964259688	0.737212837	8.090281917	5.95E-16	2.55E-14
Plekhb2	8996.186925	3.191668138	0.394706992	8.086170761	6.16E-16	2.63E-14
Casz1	5582.821039	2.226886229	0.275431294	8.085087937	6.21E-16	2.65E-14
Dock5	202.1296431	-3.325455916	0.411535049	-8.080614096	6.44E-16	2.74E-14
Myadml2	39.55710872	3.050461289	0.377783086	8.074637019	6.77E-16	2.87E-14
Syde2	111.538062	-2.483899072	0.307730393	-8.071672904	6.93E-16	2.94E-14
Gm32659	54.96100701	4.30959753	0.534179397	8.06769702	7.16E-16	3.03E-14
Gm35420	40.18841861	7.417685383	0.919715058	8.065199457	7.31E-16	3.09E-14
Usp37	1950.316964	-0.775982057	0.096236119	-8.063314086	7.43E-16	3.13E-14
Twf2	188.1841528	-1.809528604	0.224448395	-8.062114251	7.50E-16	3.16E-14
Cabp2	76.86522598	5.900887928	0.732164272	8.059513633	7.66E-16	3.22E-14
Chchd10	881.3136062	5.025451769	0.623624515	8.058457694	7.73E-16	3.24E-14
Cpt1a	4778.064935	3.506400668	0.435147711	8.05795499	7.76E-16	3.24E-14
Abca4	23726.16675	6.566414631	0.814898341	8.057955577	7.76E-16	3.24E-14
Otx2os1	159.2022055	4.46685766	0.554383015	8.057349417	7.80E-16	3.26E-14
LOC108169056	26.69835958	5.000540515	0.621058374	8.051643333	8.17E-16	3.41E-14
Grik1	830.8701305	4.910513625	0.609952353	8.050651164	8.24E-16	3.43E-14
Arid3a	488.672364	-1.888910225	0.234658477	-8.04961427	8.31E-16	3.45E-14
Gm40087	63.54538703	6.914103898	0.859161016	8.047506547	8.45E-16	3.50E-14
Myrip	712.4611495	4.369942762	0.543204459	8.044747581	8.64E-16	3.58E-14
Lrp6	2732.485168	-0.880538732	0.109523426	-8.039729586	9.00E-16	3.72E-14
BB218582	166.7715661	3.892893257	0.4843592	8.037203086	9.19E-16	3.79E-14
Pacrg	426.8451265	4.220394081	0.525352577	8.033450794	9.48E-16	3.90E-14
X6530402F18Rik	1394.260448	3.483285718	0.433830743	8.029135265	9.82E-16	4.04E-14
Bbs5	1839.381531	3.281457999	0.408819341	8.026670146	1.00E-15	4.11E-14
Rpl3l	45.20543448	4.822192762	0.600803152	8.026244112	1.01E-15	4.12E-14
Cdc42se1	746.0881836	-1.132180161	0.141154875	-8.020836414	1.05E-15	4.30E-14
Btc	170.6354749	4.933732484	0.615455146	8.016396515	1.09E-15	4.45E-14
LOC105246710	99.77847221	3.232278779	0.404276232	7.995223368	1.29E-15	5.28E-14
Snord83b	6.496571368	-2.799291808	0.35017681	-7.993938289	1.31E-15	5.32E-14
Bpifb6	49.8620204	7.715911482	0.965409041	7.992375413	1.32E-15	5.37E-14
Fam57b	16761.56484	6.482864273	0.811111926	7.992564358	1.32E-15	5.37E-14
Jchain	272.0654805	4.705369561	0.588814139	7.991264563	1.34E-15	5.41E-14
Bend3	502.2098298	-2.305021338	0.288496344	-7.989776594	1.35E-15	5.47E-14
X4930412L05Rik	35.15131634	3.089640221	0.386744664	7.988837365	1.36E-15	5.50E-14
Crx	30990.533	5.042938739	0.631284796	7.988373506	1.37E-15	5.52E-14
Kifc3	546.6365496	2.733370743	0.342293219	7.985465641	1.40E-15	5.64E-14
Tap2	42.10730108	3.54619259	0.444224095	7.982891137	1.43E-15	5.75E-14
Mc1r	165.9471952	4.796641986	0.600900158	7.982427565	1.43E-15	5.76E-14
Gm42063	75.69281871	4.203671314	0.526629627	7.982215765	1.44E-15	5.76E-14
Vtn	6464.738706	7.023701946	0.879947496	7.981955719	1.44E-15	5.76E-14
Gm10549	48.58132041	3.726287786	0.467310858	7.973895157	1.54E-15	6.14E-14
Gm19466	59.37976307	3.402271211	0.426684262	7.973744317	1.54E-15	6.14E-14
Aak1	5206.376787	2.664452265	0.334250152	7.971431733	1.57E-15	6.25E-14
Ing5	708.3400784	-1.433773962	0.179927697	-7.968611739	1.60E-15	6.38E-14
Gm38660	124.9446797	4.251777248	0.534235142	7.958625167	1.74E-15	6.91E-14
Atp8a2	2217.446197	3.40667211	0.428261116	7.95466127	1.80E-15	7.12E-14
Cdhr1	35665.62239	6.395503125	0.804214429	7.95248493	1.83E-15	7.23E-14
A930016O22Rik	52.02570135	7.78640174	0.979336138	7.95069378	1.85E-15	7.33E-14
Snx30	823.6815009	-1.112485878	0.139929749	-7.9503171	1.86E-15	7.34E-14
Plekha4	76.04869165	1.931218612	0.243040146	7.946088933	1.92E-15	7.58E-14
Zfp568	1029.666278	-2.061018998	0.25954685	-7.940836104	2.01E-15	7.90E-14
Tle2	527.9941963	2.624390116	0.330652633	7.937000511	2.07E-15	8.13E-14
Ifitm10	169.4068667	3.334824946	0.420225926	7.935790588	2.09E-15	8.20E-14
Chat	97.74977623	7.418815144	0.935631645	7.929205027	2.21E-15	8.63E-14
Gm9918	1159.7507	4.478282269	0.565047377	7.925498724	2.27E-15	8.88E-14
Gpr179	1232.482011	4.731848435	0.59722217	7.923095748	2.32E-15	9.04E-14
Mok	601.9584202	2.438804822	0.307862522	7.921733394	2.34E-15	9.12E-14
Fosb	611.7946549	8.999835927	1.136169108	7.921211611	2.35E-15	9.15E-14
Nr1d1	1056.850355	3.209524603	0.405197121	7.920896854	2.36E-15	9.16E-14
BC037032	165.6819302	2.469377779	0.311959964	7.915688118	2.46E-15	9.53E-14
Kdm4d	17.70857044	3.133726521	0.395960355	7.914243131	2.49E-15	9.63E-14
Gm34254	25.83065977	7.841099439	0.990938008	7.91280522	2.52E-15	9.73E-14
Kcnh6	565.4236967	3.722390101	0.470463836	7.912170529	2.53E-15	9.76E-14
Adrb1	112.2689786	4.388154951	0.554912339	7.907834525	2.62E-15	1.01E-13
Mycbpap	67.97217546	-1.349983859	0.170733333	-7.906973013	2.64E-15	1.01E-13
Pcp2	212.4262017	5.859132569	0.741055682	7.90646737	2.65E-15	1.02E-13
Rassf3	167.4317751	-1.408482282	0.178198099	-7.904025302	2.70E-15	1.04E-13
Adk	645.3910558	-1.271256157	0.160907683	-7.900531108	2.78E-15	1.06E-13
Erich6	113.8995879	3.53009756	0.446868155	7.899640019	2.80E-15	1.07E-13
X1.Mar.1	2624.224843	4.958826568	0.627838263	7.898254788	2.83E-15	1.08E-13
Zfp385c	189.543451	4.227891746	0.535331671	7.897705238	2.84E-15	1.08E-13
Gm14321	22.57895809	-3.444284976	0.436765458	-7.885891412	3.12E-15	1.19E-13
Tnfsf13	77.1157581	5.60446855	0.710849702	7.884182173	3.17E-15	1.20E-13
Filip1	372.7398941	-3.30763152	0.419629064	-7.882274612	3.21E-15	1.22E-13
Cdk7	1280.330613	-1.055543371	0.133921191	-7.881824828	3.23E-15	1.22E-13
LOC108168160	98.17584202	6.196346597	0.786225836	7.881128183	3.24E-15	1.23E-13
Lrp4	5880.476337	2.775007592	0.352169555	7.879748693	3.28E-15	1.24E-13
LOC675947	73.39200313	9.001774753	1.142684036	7.877746141	3.33E-15	1.26E-13
Lrp2bp	127.0526556	3.627126994	0.460440894	7.877508359	3.34E-15	1.26E-13
Izumo4	247.8926948	1.170431136	0.148635224	7.874520611	3.42E-15	1.29E-13
Gm32406	32.53289702	6.746242945	0.857285037	7.869311438	3.57E-15	1.34E-13
LOC108168383	96.98053684	6.406834142	0.814259898	7.86829139	3.60E-15	1.35E-13
Rnf207	769.8646857	5.85861722	0.744823685	7.865777281	3.67E-15	1.37E-13
Gm40464	3.403035976	-4.488536849	0.571195544	-7.858144021	3.90E-15	1.46E-13
LOC102639958	2.842035655	-5.242427411	0.667281728	-7.856392869	3.95E-15	1.48E-13
A930003O13Rik	54.82714803	4.731277997	0.602491245	7.852857672	4.07E-15	1.52E-13
Cryba1	1104.87881	-6.882698892	0.876939569	-7.848544111	4.21E-15	1.57E-13
Gulo	540.2088653	2.245282381	0.286096952	7.847977298	4.23E-15	1.57E-13
Epas1	1535.128119	3.959531075	0.504531841	7.847931005	4.23E-15	1.57E-13
Hsbp1l1	975.6587342	6.030296727	0.768566743	7.846158817	4.29E-15	1.59E-13
Gfpt2	61.78722932	-3.123583563	0.398157813	-7.845089202	4.33E-15	1.60E-13
Fmn1	913.9770377	3.690669882	0.47059777	7.842514606	4.42E-15	1.63E-13
Pde4b	798.1387338	3.413224071	0.435498894	7.837503419	4.60E-15	1.69E-13
Rdh1	18.17855192	3.000867754	0.38353408	7.824253213	5.11E-15	1.88E-13
Slc6a7	76.5230034	5.97828315	0.764195892	7.822972108	5.16E-15	1.90E-13
BB114814	292.5555978	11.35473109	1.451974093	7.820202262	5.27E-15	1.94E-13
Slc10a3	43.96510738	-2.259945795	0.289135894	-7.816206287	5.44E-15	2.00E-13
Gm16582	69.71395385	8.204002393	1.049934243	7.813824959	5.55E-15	2.03E-13
Slco4a1	2097.233914	4.035996213	0.51659079	7.812752941	5.60E-15	2.05E-13
Atg9a	1483.363582	1.375802049	0.17614098	7.810800454	5.68E-15	2.07E-13
Tpbgl	135.3970212	3.563064436	0.456513327	7.804951637	5.95E-15	2.17E-13
Scamp5	6628.550441	3.28354491	0.420725479	7.804483152	5.97E-15	2.17E-13
Meig1	147.3071107	7.984133047	1.023501706	7.800800919	6.15E-15	2.24E-13
Atxn1	1514.403627	4.198968088	0.538408164	7.798856638	6.25E-15	2.27E-13
Mdfic	124.9006746	-2.561010265	0.328443336	-7.797418856	6.32E-15	2.29E-13
Dnm3	3496.648785	3.638320625	0.467183426	7.78777761	6.82E-15	2.47E-13
Prdm9	542.3176388	2.047228761	0.262939685	7.785925353	6.92E-15	2.50E-13
Gm5432	20.17643099	3.443699934	0.442383959	7.784414112	7.00E-15	2.53E-13
Pla2g4a	44.94060323	-2.673043245	0.343733734	-7.776493789	7.46E-15	2.69E-13
Selenbp1	203.5922095	2.912642559	0.374754198	7.772141245	7.72E-15	2.78E-13
Mthfd1l	353.0889578	-2.51650252	0.32386217	-7.770288579	7.83E-15	2.81E-13
Gpc5	32.12404599	3.939346006	0.507095659	7.768447506	7.95E-15	2.85E-13
Kdm4c	4079.845144	2.564487969	0.330171913	7.767129398	8.03E-15	2.88E-13
Prkca	3853.838419	3.887293618	0.500537633	7.766236462	8.09E-15	2.89E-13
Gabrr1	587.6875965	7.575027644	0.97578364	7.763019721	8.29E-15	2.96E-13
Pepd	449.0043782	-1.01803142	0.131142137	-7.762809466	8.31E-15	2.96E-13
Eif4e3	193.714184	-1.612838046	0.207853626	-7.759489588	8.53E-15	3.04E-13
Gm35215	34.05119515	7.173662067	0.92533066	7.752539039	9.01E-15	3.20E-13
Ppp2r2b	5417.057053	4.636294506	0.598311553	7.748963705	9.26E-15	3.29E-13
Arhgap31	4355.509489	3.577478616	0.461690356	7.748653545	9.29E-15	3.29E-13
Fbxl7	110.400908	-3.328133184	0.429560032	-7.747771999	9.35E-15	3.31E-13
Kcnb1	18589.34936	5.771539429	0.745233025	7.744610388	9.59E-15	3.39E-13
Dmd	8220.866458	2.417478219	0.312339187	7.73991328	9.95E-15	3.51E-13
Gm41176	121.1890345	5.094113814	0.658544197	7.735416749	1.03E-14	3.63E-13
X2210406O10Rik	39.84671582	2.88946948	0.374158102	7.722589625	1.14E-14	4.01E-13
Elfn1	1434.040201	4.968678334	0.643880956	7.716765482	1.19E-14	4.20E-13
Gm34666	44.2629964	8.272456991	1.072169447	7.715624629	1.20E-14	4.23E-13
Bsnd	39.20846254	8.463436282	1.099057847	7.700628591	1.35E-14	4.75E-13
Scd1	415.6789404	-3.557537975	0.462187251	-7.697178944	1.39E-14	4.87E-13
Prob1	1199.519034	3.740099292	0.486012158	7.695485047	1.41E-14	4.93E-13
Lmod1	120.0790832	2.549548776	0.331392379	7.693444197	1.43E-14	5.00E-13
Acbd7	34.08646873	4.309595679	0.560181143	7.69321805	1.43E-14	5.00E-13
Nek6	380.8791007	-1.656190567	0.215303092	-7.692367757	1.44E-14	5.03E-13
Soat1	358.1058549	-1.929182314	0.250812781	-7.691722512	1.45E-14	5.05E-13
Hsd3b6	21.50083708	-7.520692772	0.978446593	-7.686360017	1.51E-14	5.24E-13
Lsp1	64.80248377	-2.218181424	0.288584778	-7.686411744	1.51E-14	5.24E-13
Gdf6	78.53666667	-3.011543434	0.391804143	-7.686349125	1.51E-14	5.24E-13
Radil	424.8706349	3.422409245	0.445262542	7.686272535	1.51E-14	5.24E-13
Trim9	2233.802238	1.812006491	0.235762017	7.685743946	1.52E-14	5.25E-13
Tnfsf12	735.9546824	6.056505377	0.788159484	7.684365286	1.54E-14	5.30E-13
Zic4	91.70991917	-3.356420566	0.43701483	-7.680335625	1.59E-14	5.46E-13
Trim71	105.4987807	-4.549178075	0.592604392	-7.676585151	1.63E-14	5.62E-13
Qprt	22.60387624	-4.72595284	0.616676018	-7.663591097	1.81E-14	6.21E-13
Dcdc2a	375.3606874	3.809622637	0.497295205	7.660686444	1.85E-14	6.32E-13
Faim2	736.7603624	5.77012754	0.753204002	7.660776527	1.85E-14	6.32E-13
Dnm1	4488.417374	3.670868126	0.4791706	7.660879292	1.85E-14	6.32E-13
Ppp3cc	3222.3862	4.535267129	0.59214945	7.658990703	1.87E-14	6.40E-13
Adora1	419.0018901	6.216881319	0.812148939	7.654853709	1.94E-14	6.60E-13
Rad50	727.9043798	-1.361543098	0.178018592	-7.648319645	2.04E-14	6.93E-13
Apobec2	368.5552744	4.973846905	0.650395663	7.647417088	2.05E-14	6.97E-13
Snora65	34.15791301	-2.170694494	0.283942676	-7.64483355	2.09E-14	7.11E-13
Ccdc63	60.49609588	4.657194032	0.609260248	7.644014267	2.11E-14	7.14E-13
Erbb2	253.0681056	-2.878650961	0.377206563	-7.631497542	2.32E-14	7.86E-13
Gm31560	20.1961303	5.485260339	0.718793656	7.63120305	2.33E-14	7.87E-13
Gm15520	82.59660235	4.443980036	0.58251165	7.628997701	2.37E-14	7.99E-13
Mxd1	1221.243416	1.424121509	0.186947076	7.617778978	2.58E-14	8.71E-13
Cbr3	19.98676979	4.868998358	0.639178421	7.617588761	2.58E-14	8.71E-13
Sardh	107.6700607	2.597713947	0.341035953	7.617126358	2.59E-14	8.73E-13
Gm41149	53.45486809	4.396786949	0.577891606	7.608324645	2.78E-14	9.33E-13
Cmtm5	28.03929405	3.928460886	0.516550089	7.605188667	2.84E-14	9.54E-13
Syngr1	4300.418601	4.065783893	0.534813044	7.60225267	2.91E-14	9.75E-13
Gm35549	53.33208424	3.594110975	0.472863685	7.600733763	2.94E-14	9.85E-13
Gm31005	102.673076	5.414231497	0.712768805	7.596055635	3.05E-14	1.02E-12
Stard5	129.8940053	-1.445918198	0.19037467	-7.595118601	3.08E-14	1.03E-12
BC065403	48.30893776	8.757645735	1.15329093	7.593613638	3.11E-14	1.04E-12
Snap23	656.9094903	-1.316288522	0.17334543	-7.593442302	3.12E-14	1.04E-12
Acsl1	2544.222735	3.32316552	0.437708294	7.592192263	3.15E-14	1.05E-12
Zfyve27	1933.631388	1.179552835	0.155441242	7.588416173	3.24E-14	1.07E-12
Sfrp1	742.231902	-4.07832436	0.537761709	-7.58388761	3.35E-14	1.11E-12
Dctd	261.9241629	-3.624919589	0.478162654	-7.580934144	3.43E-14	1.14E-12
A630020A06	15.1846743	2.827859154	0.373089456	7.579574043	3.47E-14	1.15E-12
Ccdc142	263.840666	1.035573838	0.136783485	7.570898169	3.71E-14	1.22E-12
Madd	9305.111803	3.043046572	0.402014003	7.569503926	3.75E-14	1.24E-12
X1110018N20Rik	408.0327698	4.199393803	0.554810167	7.56906426	3.76E-14	1.24E-12
Gm38732	37.40329856	3.800569665	0.502283638	7.566580674	3.83E-14	1.26E-12
Gm17330	9.759556186	-3.091768055	0.408803766	-7.56296373	3.94E-14	1.29E-12
Ccdc175	266.9627631	5.635046497	0.745275994	7.561019731	4.00E-14	1.31E-12
Gm29928	25.98136895	3.465488535	0.458452326	7.559103398	4.06E-14	1.33E-12
Gm41713	61.58362944	4.037394126	0.534875344	7.54828984	4.41E-14	1.44E-12
Camk2b	1680.246055	3.917773919	0.519145053	7.546588176	4.47E-14	1.46E-12
Igsf11	1670.346282	2.376457789	0.314985479	7.54465823	4.53E-14	1.48E-12
X2410080I02Rik	29.61090546	7.330603994	0.971703794	7.544072626	4.56E-14	1.48E-12
Gm35431	28.36652762	4.89787227	0.649342383	7.542819322	4.60E-14	1.50E-12
Gm32309	54.86537716	8.195700347	1.08697358	7.539925988	4.70E-14	1.52E-12
Col6a4	156.1494579	6.188963172	0.820823198	7.539946706	4.70E-14	1.52E-12
BE949265	100.8438883	6.686867032	0.886852081	7.54000264	4.70E-14	1.52E-12
Rgs22	810.471558	3.721528851	0.494207412	7.530297526	5.06E-14	1.64E-12
Hebp1	41.27380639	-2.721106203	0.361656186	-7.524013996	5.31E-14	1.72E-12
Gpc6	965.149185	-2.43469059	0.323600721	-7.523748969	5.32E-14	1.72E-12
Gm11734	55.84622835	4.199599538	0.558336596	7.521626856	5.41E-14	1.74E-12
Ccr9	34.18618296	3.339738464	0.444152143	7.519356868	5.50E-14	1.77E-12
Serinc4	587.3322213	3.085900776	0.410448697	7.518359288	5.55E-14	1.78E-12
Chst14	56.80982242	-1.911293874	0.25431528	-7.515450393	5.67E-14	1.82E-12
Slc6a12	46.19353202	4.594993103	0.611651737	7.512433668	5.80E-14	1.86E-12
Mapk13	17.43617624	-3.75644649	0.500307403	-7.508276844	5.99E-14	1.92E-12
Chil1	60.31255513	5.83530709	0.777299205	7.507156896	6.04E-14	1.93E-12
A230051N06Rik	30.37331061	3.321317472	0.442526986	7.505344483	6.13E-14	1.96E-12
Gm39143	17.97220038	6.993582624	0.931928902	7.504416495	6.17E-14	1.97E-12
D930028M14Rik	149.0450485	-5.506977925	0.733874612	-7.503976612	6.19E-14	1.97E-12
Chadl	55.31387526	2.765290044	0.368552037	7.503119693	6.23E-14	1.98E-12
Fv1	197.8565564	-1.247699149	0.166310304	-7.502235991	6.27E-14	1.99E-12
Luzp1	1706.712209	-1.521883332	0.202955674	-7.498599566	6.45E-14	2.05E-12
Chrna2	49.05591533	7.699554988	1.027045996	7.496796655	6.54E-14	2.07E-12
Kiss1r	95.93631793	2.430669289	0.324425248	7.492232194	6.77E-14	2.14E-12
Herc3	9157.526814	4.202509867	0.560995385	7.491166553	6.83E-14	2.16E-12
Tert	206.9256076	-2.83177081	0.378186981	-7.487753292	7.01E-14	2.21E-12
Nrxn3	2693.070815	3.414483284	0.45619274	7.484738329	7.17E-14	2.26E-12
LOC102638515	56.80208095	4.238809056	0.566449725	7.483116093	7.26E-14	2.29E-12
Cul9	1586.970813	2.089388167	0.279451144	7.476756543	7.62E-14	2.40E-12
Myl7	6.860828848	-3.874414668	0.518261668	-7.475788599	7.67E-14	2.41E-12
Pigz	119.3034541	2.261509393	0.302539047	7.47509922	7.71E-14	2.42E-12
Syt15	102.690399	6.174442053	0.826933584	7.466672259	8.22E-14	2.58E-12
LOC108168986	35.59562453	4.013495191	0.537556523	7.466182668	8.26E-14	2.59E-12
Dkk2	36.65254991	-5.280272602	0.707274209	-7.465665419	8.29E-14	2.59E-12
Gm41285	163.3446722	3.439688713	0.460829352	7.464126788	8.39E-14	2.62E-12
Tmem91	51.63871682	2.330409955	0.312246503	7.463366065	8.43E-14	2.63E-12
Camk2d	5952.326899	2.856124893	0.382837271	7.460414938	8.63E-14	2.69E-12
Fam161a	4300.989465	4.470654972	0.599368634	7.458940487	8.72E-14	2.71E-12
Ermap	28.9228546	-3.651441648	0.489550839	-7.458758834	8.73E-14	2.71E-12
Hpse2	8.186483699	-4.689489329	0.628841241	-7.45735016	8.83E-14	2.74E-12
Fabp4	39.38062295	5.823166216	0.781703552	7.449328071	9.38E-14	2.91E-12
Slc4a10	1156.735888	6.285448359	0.843978611	7.447402428	9.52E-14	2.95E-12
Gm31726	9.207843752	-4.499093786	0.604209944	-7.446242532	9.60E-14	2.97E-12
Me1	1919.907845	3.846104719	0.516533344	7.445995041	9.62E-14	2.97E-12
Crtap	119.090172	-2.550419158	0.342840666	-7.439080056	1.01E-13	3.13E-12
Klhl22	1102.404646	-0.437139081	0.058789879	-7.435618007	1.04E-13	3.21E-12
Nfatc4	181.1812556	-3.288268447	0.442344862	-7.433721362	1.06E-13	3.25E-12
Dennd6b	1794.504278	1.253759554	0.168816906	7.426741713	1.11E-13	3.42E-12
Irf2	422.5840592	1.085867889	0.146226481	7.425931877	1.12E-13	3.44E-12
Rpl7l1	1661.02899	-1.280748126	0.172551689	-7.422402723	1.15E-13	3.53E-12
Foxi3	46.90993357	-4.227745059	0.569796276	-7.419748496	1.17E-13	3.59E-12
Drd4	1914.558933	8.005428686	1.078956231	7.419604663	1.17E-13	3.59E-12
Gm34289	60.47288763	7.626817299	1.028585213	7.414861892	1.22E-13	3.72E-12
LOC108169049	21.32733831	4.849113368	0.654364073	7.41042115	1.26E-13	3.84E-12
Gm27230	23.6245544	6.989043629	0.944045995	7.403287197	1.33E-13	4.05E-12
Tcp11	484.0937186	3.41604398	0.461563275	7.40103072	1.35E-13	4.11E-12
Iqcd	180.3224906	3.402160954	0.46009469	7.394479941	1.42E-13	4.32E-12
Gm3716	44.08232276	-2.683199885	0.362902557	-7.393719983	1.43E-13	4.34E-12
AW047730	33.27444478	6.188615524	0.837445572	7.38987193	1.47E-13	4.46E-12
Pwwp2b	383.414984	3.568281474	0.482886944	7.389475975	1.47E-13	4.46E-12
Gm41741	3.903409759	-4.338592504	0.587623549	-7.383285631	1.54E-13	4.67E-12
Trim25	545.6547036	2.593293037	0.351281179	7.382385369	1.55E-13	4.70E-12
Acsf2	141.3657536	-2.550705103	0.34552516	-7.382111047	1.56E-13	4.70E-12
Arhgap24	1581.461239	4.629092766	0.627216413	7.380375689	1.58E-13	4.76E-12
Gm21145	27.50330748	-2.259121629	0.306116052	-7.379951539	1.58E-13	4.77E-12
Spryd4	184.3965039	-1.198617127	0.162427786	-7.379384751	1.59E-13	4.78E-12
Foxk2	1891.089215	-0.823110622	0.111581449	-7.376769427	1.62E-13	4.87E-12
Nol10	587.0325896	-0.813223284	0.110246041	-7.376439804	1.63E-13	4.88E-12
Fat4	1882.927307	-3.072888803	0.416745124	-7.3735447	1.66E-13	4.98E-12
X2410022M11Rik	60.46229024	1.784548643	0.242126276	7.370322095	1.70E-13	5.09E-12
Polr3gl	811.7777061	1.591146433	0.215911535	7.369436899	1.71E-13	5.12E-12
Hyal3	68.40879424	2.543637791	0.345200686	7.368576877	1.72E-13	5.15E-12
X4833428L15Rik	22.33744709	4.944308633	0.671049523	7.368023468	1.73E-13	5.16E-12
Slc12a5	4865.957952	3.803958042	0.516531555	7.364425274	1.78E-13	5.30E-12
Loxl4	117.1483651	4.514017284	0.613021648	7.363552822	1.79E-13	5.33E-12
Hpcal4	652.7955998	5.292045728	0.718777396	7.362565601	1.80E-13	5.36E-12
Eps8	904.2006789	4.163626687	0.565586813	7.361604953	1.82E-13	5.39E-12
LOC102634904	68.2309987	3.945255728	0.536070847	7.359578957	1.84E-13	5.47E-12
Kyat1	492.9841445	1.024083425	0.139163589	7.358846038	1.86E-13	5.49E-12
Gm35721	24.51366701	5.577389612	0.757980541	7.358222689	1.86E-13	5.51E-12
Stx3	22409.21495	4.966584646	0.675025235	7.357628112	1.87E-13	5.53E-12
Unc5d	457.2221765	3.518792493	0.47846013	7.354411103	1.92E-13	5.66E-12
X1500011B03Rik	1359.203949	1.696149019	0.230796187	7.349120638	2.00E-13	5.88E-12
Plcb3	358.5877802	-2.179504202	0.296576208	-7.348884172	2.00E-13	5.88E-12
LOC108168398	26.95943023	5.294852744	0.720844948	7.345342104	2.05E-13	6.03E-12
Tbx5	143.8786425	-2.658886785	0.362181879	-7.341302638	2.12E-13	6.20E-12
Lamc1	1098.19409	-1.324343755	0.180395096	-7.341351189	2.11E-13	6.20E-12
Gm31282	41.84170805	3.04033773	0.41420291	7.340213351	2.13E-13	6.25E-12
Tbc1d2	67.48648205	2.215779374	0.301908179	7.339249241	2.15E-13	6.28E-12
Aldh1a2	10.46631733	-4.098633228	0.558938938	-7.332881914	2.25E-13	6.58E-12
Gm3134	11.31745638	-2.886902583	0.39369964	-7.332753923	2.25E-13	6.58E-12
Tmem86a	1190.445986	3.897985268	0.531713048	7.330994192	2.28E-13	6.66E-12
Rps6ka1	223.3572168	-1.838548082	0.250803679	-7.330626432	2.29E-13	6.67E-12
Gm31134	51.22035464	6.104472038	0.833112026	7.327312347	2.35E-13	6.83E-12
Cpeb3	980.3228053	2.794325418	0.381629552	7.322088669	2.44E-13	7.09E-12
Gm40435	35.49285919	4.020922937	0.54920954	7.321291129	2.46E-13	7.13E-12
Prickle1	846.7968519	3.564061811	0.487073859	7.317292332	2.53E-13	7.33E-12
Agbl3	395.7815919	2.204806217	0.301436647	7.314327048	2.59E-13	7.49E-12
Gm16486	49.14736005	2.564552154	0.350934452	7.307781096	2.72E-13	7.85E-12
Pctp	188.3244301	-2.134318854	0.292167914	-7.305110366	2.77E-13	8.00E-12
Lum	42.9020838	-7.447399255	1.019777277	-7.302966462	2.81E-13	8.12E-12
Ttyh1	6213.625129	4.091220657	0.560738273	7.29613236	2.96E-13	8.53E-12
Usp53	685.7906347	1.014528234	0.139066503	7.295273935	2.98E-13	8.58E-12
Slco1a4	101.3216517	9.105395481	1.248202322	7.29480736	2.99E-13	8.60E-12
Gad1	1895.208392	5.44964441	0.747158993	7.293821608	3.01E-13	8.65E-12
Amy1	769.5469561	4.136807013	0.567181064	7.293626813	3.02E-13	8.66E-12
Pcp4	1044.1822	4.910773891	0.673843961	7.287701868	3.15E-13	9.03E-12
Lim2	45.64623308	-7.589233853	1.04179614	-7.284759042	3.22E-13	9.22E-12
Prickle3	20.14816864	-1.901471687	0.261036125	-7.284323903	3.23E-13	9.24E-12
Rdh9	28.66037913	2.506298537	0.344115345	7.283309423	3.26E-13	9.30E-12
Itm2a	1490.059393	-2.790715911	0.383183152	-7.282981769	3.27E-13	9.31E-12
Igfn1	461.2978124	5.980477781	0.821333491	7.28142447	3.30E-13	9.41E-12
Rbms2	648.5562609	-2.180906571	0.299600829	-7.279374276	3.35E-13	9.54E-12
Gjd2	1252.211359	4.904131043	0.67376853	7.278658507	3.37E-13	9.58E-12
Mtap	615.4442531	-3.374155675	0.463647061	-7.277422768	3.40E-13	9.66E-12
Txlnb	8.872118738	-2.866892649	0.393972445	-7.276886195	3.42E-13	9.69E-12
Ptp4a3	6753.113074	4.570481647	0.628573887	7.271192368	3.56E-13	1.01E-11
Lncppara	28.88720895	7.620359136	1.048074204	7.270820243	3.57E-13	1.01E-11
Rab32	23.46651773	-1.91059619	0.262773072	-7.270897934	3.57E-13	1.01E-11
Hspb6	1776.275721	4.776642817	0.657147387	7.268754181	3.63E-13	1.02E-11
C130080G10Rik	66.48958768	7.783883859	1.070937751	7.268287865	3.64E-13	1.03E-11
Tsc22d3	835.3325563	-0.857467629	0.117977771	-7.268044002	3.65E-13	1.03E-11
D430042O09Rik	3477.381346	2.429738465	0.33435666	7.266906132	3.68E-13	1.03E-11
Kcnk5	43.43957414	-3.968911513	0.546204015	-7.266353605	3.69E-13	1.04E-11
Fam109b	24.33582962	-1.893890094	0.260780518	-7.262391015	3.80E-13	1.07E-11
Mamld1	1881.52457	2.049058187	0.282182928	7.261453413	3.83E-13	1.07E-11
Gm31166	188.7439051	3.032251711	0.417594443	7.261235786	3.84E-13	1.07E-11
Cd8a	58.86998085	3.79477187	0.522754023	7.259192089	3.89E-13	1.09E-11
Fst	104.2887285	-4.015189747	0.55314363	-7.258855626	3.90E-13	1.09E-11
Ccdc65	253.9110447	4.031363364	0.555595929	7.255926753	3.99E-13	1.11E-11
Mab21l2	1465.387299	-2.281215879	0.314467222	-7.254224677	4.04E-13	1.13E-11
Cnksr1	221.33123	3.93259936	0.542207586	7.252940505	4.08E-13	1.14E-11
Tnfrsf10b	35.99212422	-1.749666277	0.241257662	-7.252272382	4.10E-13	1.14E-11
Gm31815	7.999684922	5.874000778	0.809990739	7.251935722	4.11E-13	1.14E-11
Pla2g7	3822.760027	5.177429717	0.714634026	7.244868744	4.33E-13	1.20E-11
Gm41025	170.4450879	2.789421446	0.385176839	7.241924138	4.42E-13	1.23E-11
Accsl	16.11006565	2.992807075	0.413368107	7.240053179	4.49E-13	1.24E-11
LOC102633322	7.956943959	-3.158466631	0.436449138	-7.236734727	4.60E-13	1.27E-11
Spata1	420.5427352	2.349925042	0.324838218	7.234139689	4.68E-13	1.29E-11
Mettl1	191.024574	-1.519726385	0.210137606	-7.232053401	4.76E-13	1.31E-11
Gm38440	19.31062694	1.866566557	0.258143519	7.230731829	4.80E-13	1.32E-11
Pax2	82.30478517	-3.897648549	0.539115642	-7.229707776	4.84E-13	1.33E-11
Orm3	13.41373718	4.056424505	0.561127434	7.229061095	4.86E-13	1.34E-11
Pitx2	24.46014053	-6.43675057	0.890586915	-7.227537776	4.92E-13	1.35E-11
X1700007K13Rik	62.02616716	5.352246165	0.741024	7.222770331	5.09E-13	1.40E-11
Gm33370	28.85139539	3.193803747	0.442234082	7.221975593	5.12E-13	1.41E-11
Wdr20	1277.518052	1.384721972	0.191803024	7.219500212	5.22E-13	1.43E-11
Pcsk4	358.2371286	3.327941423	0.461128245	7.216954194	5.32E-13	1.45E-11
X4930572G02Rik	154.4809772	4.049206376	0.561236801	7.214791282	5.40E-13	1.48E-11
Fnip1	2789.670213	1.077781519	0.1494081	7.213675276	5.45E-13	1.49E-11
X1700010L04Rik	109.6432397	3.382612997	0.469424605	7.205870686	5.77E-13	1.57E-11
Maea	1678.52579	-1.097703437	0.152386984	-7.203393697	5.87E-13	1.60E-11
Rgs19	173.4476209	-2.29230511	0.318252786	-7.202780977	5.90E-13	1.61E-11
Ebpl	3756.792874	4.356045872	0.605363366	7.195754021	6.21E-13	1.69E-11
Snord52	27.32699129	-2.941387795	0.408964776	-7.192276611	6.37E-13	1.73E-11
Vmac	435.6551706	1.118536098	0.155529876	7.19177645	6.40E-13	1.73E-11
Gm41804	26.55516139	4.701494664	0.653864184	7.19032297	6.46E-13	1.75E-11
Cfap206	305.9708949	3.426384652	0.476545145	7.190052592	6.48E-13	1.75E-11
Zfp78	406.740426	2.464584311	0.342787558	7.189830116	6.49E-13	1.75E-11
Tdrd7	9192.650907	4.42331064	0.615487177	7.186682035	6.64E-13	1.79E-11
X4930453L07Rik	6.453984948	-4.206904346	0.585401406	-7.186358465	6.65E-13	1.80E-11
Junb	194.573121	5.589635837	0.777978328	7.184822043	6.73E-13	1.81E-11
Gm11754	48.18793319	8.035784122	1.119233059	7.179723704	6.99E-13	1.88E-11
Abtb1	831.7385979	1.39352382	0.194286454	7.172521752	7.36E-13	1.98E-11
Fam102a	1204.520537	1.520278105	0.212067578	7.168837975	7.56E-13	2.03E-11
X5430419D17Rik	115.8764293	10.01848812	1.397700916	7.16783398	7.62E-13	2.04E-11
Phc3	2882.381464	0.831492562	0.116038461	7.165663462	7.74E-13	2.07E-11
Sirt4	634.5195612	2.010006069	0.2805362	7.164872367	7.79E-13	2.08E-11
Mzb1	113.2420873	4.251917685	0.593453027	7.164708063	7.80E-13	2.08E-11
Phf13	372.5978019	-1.882701345	0.262886374	-7.161654349	7.97E-13	2.13E-11
Cxadr	2377.701839	-1.244338731	0.173775672	-7.16060376	8.03E-13	2.14E-11
Naaa	681.6841061	2.966525319	0.414411069	7.158412367	8.16E-13	2.18E-11
Adam17	992.7610382	-1.072275254	0.149796743	-7.158201402	8.17E-13	2.18E-11
Trnp1	836.2449823	4.987535801	0.696803742	7.157733951	8.20E-13	2.18E-11
Kank2	252.0726424	-2.324498115	0.324850639	-7.155590404	8.33E-13	2.21E-11
Nup205	3357.028571	-1.140592107	0.159406333	-7.155249658	8.35E-13	2.22E-11
LOC102636313	40.23662706	2.394990101	0.334742346	7.154727005	8.38E-13	2.22E-11
Srm	493.406573	-1.381308519	0.193092545	-7.153608762	8.45E-13	2.24E-11
Pcdhb12	115.406318	3.24482888	0.453627121	7.15307513	8.49E-13	2.25E-11
Pcdhb19	419.3161983	2.408717814	0.336789335	7.152001448	8.55E-13	2.26E-11
Bin1	6231.266787	2.545395585	0.356027601	7.1494333	8.71E-13	2.30E-11
Slc24a4	364.0098057	4.709911222	0.659005454	7.146998856	8.87E-13	2.34E-11
Gm16104	91.73907395	3.260636026	0.456255507	7.146513243	8.90E-13	2.35E-11
Crhbp	339.332438	-4.114314239	0.576112995	-7.141505697	9.23E-13	2.43E-11
LOC108167986	10.20733216	-3.221016753	0.451102857	-7.140315575	9.31E-13	2.45E-11
Fndc1	312.0420649	4.273209304	0.598545565	7.139321641	9.38E-13	2.46E-11
Pald1	228.6633632	-2.686933094	0.376438599	-7.137772529	9.49E-13	2.49E-11
Dsp	42.42081834	-4.821008408	0.675736209	-7.134453268	9.72E-13	2.55E-11
Psg16	277.7700201	2.878999693	0.403579449	7.133662775	9.77E-13	2.56E-11
Paics	5445.206469	-1.505933239	0.211111063	-7.133369587	9.79E-13	2.56E-11
Scgn	426.9859716	6.567589567	0.920704165	7.133224568	9.80E-13	2.56E-11
Gm32918	23.30077772	6.935933645	0.972442787	7.132485053	9.86E-13	2.57E-11
Itpkb	260.361823	-1.530829836	0.21471674	-7.12953184	1.01E-12	2.63E-11
Paqr9	115.3623375	3.90672087	0.547980949	7.129300529	1.01E-12	2.63E-11
Ndrg1	16807.58897	4.037746916	0.566572013	7.126626139	1.03E-12	2.68E-11
Fzd7	280.7496546	-2.819433778	0.395877487	-7.121985643	1.06E-12	2.77E-11
Igf2bp3	1507.878924	-2.802464568	0.393508547	-7.121737487	1.07E-12	2.77E-11
S100a11	88.3454452	-2.112118011	0.296651434	-7.119864481	1.08E-12	2.80E-11
Agpat3	22215.18049	4.232989532	0.594721969	7.11759402	1.10E-12	2.85E-11
Gm32261	84.54333046	2.863981337	0.402503279	7.115423608	1.12E-12	2.89E-11
Phactr1	3070.578648	3.187074523	0.447906885	7.115484563	1.12E-12	2.89E-11
Frmd7	75.9461599	4.820889298	0.677738624	7.113198398	1.13E-12	2.93E-11
Otor	64.6091649	6.065895522	0.853357474	7.108270224	1.18E-12	3.03E-11
Gpr62	186.899293	1.943074732	0.273559015	7.102945354	1.22E-12	3.15E-11
Gm40268	3.67657666	-3.500799824	0.493115781	-7.099346558	1.25E-12	3.23E-11
Lrrc73	335.2584403	3.736668052	0.526401867	7.09850836	1.26E-12	3.24E-11
Tubb1	6.254349791	-5.572168576	0.785094641	-7.09744824	1.27E-12	3.27E-11
Abhd16a	925.2371485	1.176560116	0.165787436	7.096799036	1.28E-12	3.28E-11
Taf6	751.3861475	-0.901591323	0.127073079	-7.095061617	1.29E-12	3.31E-11
Zmat3	725.2075514	-1.284954481	0.181107152	-7.094995805	1.29E-12	3.31E-11
Gm9631	1.6349516	-4.382541791	0.617740892	-7.094466053	1.30E-12	3.32E-11
Tmem151a	125.1033172	3.975568782	0.56046196	7.093378434	1.31E-12	3.35E-11
Slc26a8	63.53173813	1.657720143	0.233774684	7.091102052	1.33E-12	3.40E-11
Paox	79.09134335	-1.058340227	0.149259785	-7.09059193	1.34E-12	3.41E-11
Vsnl1	898.5214546	4.660486823	0.658427287	7.078210323	1.46E-12	3.72E-11
X5033430I15Rik	70.99636877	5.119755998	0.723814609	7.073297405	1.51E-12	3.85E-11
Gsap	279.4002231	2.070117368	0.29271119	7.072218071	1.52E-12	3.88E-11
Plppr4	623.8410902	3.421728298	0.483906917	7.071046475	1.54E-12	3.91E-11
Cacna1s	151.3498311	7.088399911	1.003392067	7.06443687	1.61E-12	4.09E-11
Rspo2	257.0917608	3.627903315	0.513581582	7.063927989	1.62E-12	4.10E-11
Nipal1	57.65143585	5.689023032	0.805413039	7.063485142	1.62E-12	4.11E-11
Camkk1	1252.684683	2.815180968	0.398883234	7.057656801	1.69E-12	4.29E-11
Ptpn14	325.8690847	-2.70765875	0.383741338	-7.055947548	1.71E-12	4.33E-11
Myo15	21.60842882	1.97143923	0.279690048	7.048657061	1.81E-12	4.56E-11
Gja3	49.26947718	-8.12169678	1.152290476	-7.048306786	1.81E-12	4.57E-11
Pla2g5	1480.31197	4.00260267	0.568276349	7.043408852	1.88E-12	4.73E-11
Gm34640	44.74901267	8.642470812	1.227268736	7.042036157	1.89E-12	4.77E-11
Mdc1	2630.059525	-1.609218177	0.228634611	-7.038383951	1.94E-12	4.89E-11
Kel	18.8352092	-7.716594405	1.096430305	-7.037925135	1.95E-12	4.90E-11
Dync1i1	232.5435818	5.080668065	0.722290113	7.034109938	2.01E-12	5.03E-11
Slc25a33	1704.143954	3.278466451	0.466107652	7.033710857	2.01E-12	5.04E-11
Prdm8	558.7057494	3.332730668	0.474126822	7.029196645	2.08E-12	5.20E-11
Rspo1	11.31126714	-5.644927743	0.803111064	-7.028825772	2.08E-12	5.21E-11
Synpo2	586.2447566	3.521883226	0.501342661	7.024902326	2.14E-12	5.36E-11
Haus3	377.1973283	-1.759834086	0.250538208	-7.024214381	2.15E-12	5.38E-11
Samsn1	518.414517	3.097597788	0.441014747	7.023796395	2.16E-12	5.39E-11
Vsx1	278.5132516	6.452363572	0.918836995	7.022315828	2.18E-12	5.44E-11
Aldh1a3	1455.258772	-5.464981787	0.778699822	-7.018085319	2.25E-12	5.60E-11
Xcr1	60.65516858	5.571042067	0.793868968	7.017583875	2.26E-12	5.62E-11
Gm39464	16.47726771	5.205882928	0.741906909	7.016895067	2.27E-12	5.63E-11
Klkb1	55.91196258	5.689471132	0.810817952	7.016952592	2.27E-12	5.63E-11
Lgi3	208.658667	5.601658216	0.798385956	7.016228401	2.28E-12	5.65E-11
Gm19410	42.63115716	3.614577001	0.515377729	7.01345207	2.33E-12	5.76E-11
Mir124a.2	12.33104326	6.088243684	0.868276712	7.011870293	2.35E-12	5.82E-11
Gbp6	21.23020951	4.177666492	0.596066327	7.008727555	2.40E-12	5.95E-11
Gm37896	44.4847908	3.840246162	0.548012915	7.007583324	2.42E-12	5.99E-11
Col6a5	19.24056197	5.428252978	0.775044734	7.003793125	2.49E-12	6.15E-11
Msrb3	142.3820788	-1.770277585	0.252888452	-7.00023101	2.56E-12	6.30E-11
LOC108167437	86.76313697	5.255788125	0.750981785	6.998556062	2.59E-12	6.37E-11
Lin28a	258.5460502	-3.822184562	0.54614612	-6.9984651	2.59E-12	6.37E-11
Palb2	211.7336591	-1.798032908	0.257032218	-6.995360053	2.65E-12	6.50E-11
Osbpl11	824.3009159	-0.649410075	0.092843957	-6.9946402	2.66E-12	6.53E-11
Slc7a4	299.0049601	2.696124102	0.386020432	6.98440776	2.86E-12	7.02E-11
Alpk2	49.02618917	7.653529578	1.096111913	6.982434447	2.90E-12	7.11E-11
LOC108167719	8.589313486	-2.603524401	0.372915351	-6.981542576	2.92E-12	7.15E-11
Vmn2r29	51.45024869	1.242605845	0.17801767	6.980238781	2.95E-12	7.21E-11
Hira	1872.980634	-0.742593185	0.106434498	-6.976997119	3.02E-12	7.37E-11
Crkl	2165.221554	-0.840970101	0.120542725	-6.976531376	3.03E-12	7.39E-11
Gnb3	6131.181298	4.543176157	0.651639536	6.971916075	3.13E-12	7.63E-11
Gm3898	19.40952405	7.457606815	1.069691975	6.971732974	3.13E-12	7.63E-11
Mgll	685.4922941	2.743349643	0.393631458	6.96933538	3.18E-12	7.75E-11
Mfsd7a	5.233013994	-2.480230749	0.356024507	-6.966460727	3.25E-12	7.90E-11
Gm32631	11.04096802	4.560289077	0.654722325	6.965226175	3.28E-12	7.97E-11
Doc2b	4771.373069	4.185306354	0.601068221	6.963113687	3.33E-12	8.08E-11
Uck2	1685.317412	-2.297303178	0.329974825	-6.962055901	3.35E-12	8.13E-11
Ldlrad4	467.9907813	2.474339251	0.355429865	6.96154008	3.37E-12	8.15E-11
Plcxd2	5019.243211	3.329815871	0.478449639	6.959595327	3.41E-12	8.26E-11
Kif21a	4651.667307	0.971591799	0.139611955	6.959230686	3.42E-12	8.27E-11
Chrm1	43.91387599	5.570887959	0.800527144	6.959024436	3.43E-12	8.28E-11
Hcrtr1	38.10522814	3.631993284	0.522225467	6.954837541	3.53E-12	8.52E-11
C330021F23Rik	50.51767983	-2.551714175	0.366952153	-6.953806251	3.56E-12	8.57E-11
Tuba4a	576.0638366	3.671354338	0.528291264	6.94948902	3.67E-12	8.83E-11
Arl6	4762.981324	3.094425169	0.445298322	6.949105845	3.68E-12	8.85E-11
Wipf1	190.4353245	-1.837177248	0.264433252	-6.947602971	3.72E-12	8.93E-11
Carf	872.8433033	1.080390775	0.155543864	6.945891329	3.76E-12	9.03E-11
Ggt1	38.35224917	-2.292739308	0.330132589	-6.944904506	3.79E-12	9.09E-11
Nr4a1	391.3727079	2.289743217	0.329869455	6.941361742	3.88E-12	9.31E-11
Ikbkap	2747.491308	-1.168183792	0.168297075	-6.941200802	3.89E-12	9.31E-11
Blvra	187.3351556	2.214993058	0.319140098	6.940503795	3.91E-12	9.35E-11
Slc25a15	339.9182366	-1.100276536	0.158649587	-6.935262526	4.05E-12	9.69E-11
Wfdc1	187.7495769	-4.528644256	0.653125701	-6.933801946	4.10E-12	9.77E-11
Fgfr2	196.6514661	-4.033730295	0.581738961	-6.933918068	4.09E-12	9.77E-11
Cfap58	36.32811769	5.072917944	0.731637735	6.933647218	4.10E-12	9.77E-11
Galm	111.0571799	-1.939421578	0.279853671	-6.93012734	4.20E-12	1.00E-10
X9030625G05Rik	20.56934492	4.998464512	0.721385324	6.928980041	4.24E-12	1.01E-10
Lrrc24	224.5490461	3.030787627	0.437570125	6.926404369	4.32E-12	1.02E-10
Fam57a	279.3001018	-1.007704766	0.145485778	-6.926482985	4.31E-12	1.02E-10
Mpv17l	306.0015956	1.537193541	0.221953955	6.925731692	4.34E-12	1.03E-10
Skp2	1011.05374	-2.651823022	0.382925337	-6.925169911	4.35E-12	1.03E-10
Gm35658	76.55838308	1.996896507	0.288409265	6.923829256	4.40E-12	1.04E-10
Mesp1	33.48946329	8.205660599	1.185467711	6.921876086	4.46E-12	1.05E-10
Gabra1	831.7695594	4.954766986	0.715835147	6.921659275	4.46E-12	1.05E-10
Col5a1	311.6549972	-2.609152825	0.377066748	-6.919604657	4.53E-12	1.07E-10
Dio2	297.9608857	5.543654211	0.801360495	6.917803222	4.59E-12	1.08E-10
Gm15850	36.17433389	5.451263499	0.78806312	6.917292999	4.60E-12	1.08E-10
Gm38528	83.9343991	3.669550543	0.530519675	6.916898117	4.62E-12	1.09E-10
Kcna1	304.7934221	4.505848919	0.651556858	6.915511458	4.66E-12	1.10E-10
Gm30706	50.56454364	4.538331653	0.656394911	6.914026265	4.71E-12	1.11E-10
Calb1	546.1206066	4.969202362	0.718766342	6.913515656	4.73E-12	1.11E-10
A230050P20Rik	151.7820564	4.351775116	0.629932448	6.908320292	4.90E-12	1.15E-10
Mir182	6.215114516	5.873247287	0.850275548	6.907463466	4.93E-12	1.16E-10
Thrsp	70.54695951	4.977032875	0.720540464	6.907360687	4.94E-12	1.16E-10
Glb1l3	242.373025	9.098713262	1.317544537	6.905810776	4.99E-12	1.17E-10
Sphkap	4346.766315	3.153570658	0.456710444	6.904967247	5.02E-12	1.17E-10
Loxl2	333.3033826	-2.821496304	0.408693053	-6.903705076	5.07E-12	1.18E-10
Trim10	12.62637017	-4.359984963	0.631570816	-6.903398401	5.08E-12	1.18E-10
Pdzd2	2877.988746	2.153468784	0.312003191	6.902072936	5.12E-12	1.19E-10
Nsdhl	679.0771892	-1.189482665	0.172372129	-6.900667032	5.18E-12	1.20E-10
Cbln4	49.3307381	5.049226614	0.73185966	6.899173284	5.23E-12	1.22E-10
Unc13c	721.8264738	3.279505608	0.475370659	6.898838927	5.24E-12	1.22E-10
X1700018L02Rik	51.18412876	3.058124713	0.443310191	6.898385767	5.26E-12	1.22E-10
Pcdhb14	181.1559031	2.971161549	0.4310922	6.892171909	5.49E-12	1.27E-10
Kat2a	857.5133188	-1.411333804	0.204834798	-6.890107643	5.58E-12	1.29E-10
Pou2f2	259.2012673	-3.187307887	0.462630377	-6.889534376	5.60E-12	1.30E-10
LOC105243282	116.7068144	4.321849034	0.627430248	6.888174495	5.65E-12	1.31E-10
Ror2	32.71543312	-2.94422969	0.427467176	-6.887615842	5.67E-12	1.31E-10
X1700112J16Rik	27.78424629	3.210350719	0.466146347	6.88700177	5.70E-12	1.32E-10
Zic1	844.7058145	-3.416228022	0.496244103	-6.884168499	5.81E-12	1.34E-10
Jam2	8681.259534	2.840113878	0.412555737	6.88419436	5.81E-12	1.34E-10
Trak2	11264.9387	2.86208576	0.415744002	6.884250272	5.81E-12	1.34E-10
A630001G21Rik	12.58981929	-2.96678113	0.431135326	-6.8813223	5.93E-12	1.36E-10
Gm42162	54.43746727	-1.576645752	0.229126742	-6.881107543	5.94E-12	1.36E-10
Ttr	245.8232921	5.224478065	0.759426326	6.879506134	6.01E-12	1.38E-10
Rasgrf1	408.1656295	5.927489082	0.861811365	6.877942579	6.07E-12	1.39E-10
Iqgap2	869.4122889	-3.057206545	0.444713478	-6.87455339	6.22E-12	1.42E-10
Ptpn13	1089.323592	-2.411045855	0.350748446	-6.874002948	6.24E-12	1.43E-10
Lair1	125.7808373	2.262266874	0.329142564	6.873212763	6.28E-12	1.44E-10
Guca1b	9469.478782	7.511689517	1.093195691	6.871312775	6.36E-12	1.45E-10
Adcy2	1615.160017	3.240225801	0.471576415	6.871051427	6.37E-12	1.45E-10
Ppfia2	3119.12942	2.661837021	0.387526399	6.868788881	6.47E-12	1.48E-10
Cfap61	65.17653897	2.968877747	0.43225683	6.868318876	6.50E-12	1.48E-10
Hadh	823.963528	-2.086534424	0.303905972	-6.865723661	6.62E-12	1.51E-10
Wdr76	675.1257524	-2.040447488	0.297496049	-6.858738119	6.95E-12	1.58E-10
Gm26666	347.4553885	2.982138669	0.434971298	6.85594356	7.08E-12	1.61E-10
Csf1	139.2506625	-2.462407855	0.359202735	-6.855203523	7.12E-12	1.62E-10
Pcdhb11	188.9704528	2.8043474	0.409227602	6.852781641	7.24E-12	1.64E-10
LOC102634078	141.3983424	1.621196347	0.236611873	6.851711721	7.30E-12	1.65E-10
Ttll11	132.9345185	2.561491031	0.373875338	6.851190152	7.32E-12	1.66E-10
Eya1	132.8553507	-1.756486156	0.256384641	-6.850980411	7.33E-12	1.66E-10
Tbc1d23	2083.072208	1.195321701	0.174488316	6.850439766	7.36E-12	1.66E-10
Hs6st3	62.70857745	3.981062055	0.581425266	6.847074406	7.54E-12	1.70E-10
Kcnc3	853.3227536	3.097624784	0.452742567	6.841911961	7.81E-12	1.76E-10
Fgf1	230.8110523	5.94028824	0.86826004	6.841600407	7.83E-12	1.77E-10
Rhoh	9.679342402	-1.986335901	0.290355757	-6.841041909	7.86E-12	1.77E-10
Slc38a3	6310.576297	2.638568937	0.385717159	6.840683328	7.88E-12	1.77E-10
B3galt5	100.4580505	4.523097889	0.661337773	6.839315818	7.96E-12	1.79E-10
Cxcr6	33.81055302	2.977697389	0.43543882	6.838382923	8.01E-12	1.80E-10
Gpatch4	295.6341331	-1.760791244	0.257528357	-6.837271295	8.07E-12	1.81E-10
Greb1	505.616413	-2.596510486	0.3797776	-6.836923728	8.09E-12	1.81E-10
X4831440E17Rik	244.4129316	2.587829405	0.37859537	6.835343515	8.18E-12	1.83E-10
Rogdi	1410.756333	2.103949542	0.307943692	6.832254055	8.36E-12	1.87E-10
Klhl33	171.5070232	3.331084956	0.487760466	6.82934593	8.53E-12	1.91E-10
Rbp1	747.5754527	-2.505172518	0.366937845	-6.827239413	8.66E-12	1.93E-10
Mtfp1	1110.562824	3.347054955	0.490643411	6.821766844	8.99E-12	2.01E-10
Slc39a10	2677.320556	-1.865327924	0.27357048	-6.818454685	9.20E-12	2.05E-10
Ahcy	661.6499714	-2.042039245	0.299514497	-6.817831077	9.24E-12	2.06E-10
Mgst1	99.05293071	-2.031710522	0.298145301	-6.814497882	9.46E-12	2.11E-10
Plekhh1	267.3177813	-1.845175121	0.27079518	-6.813914193	9.50E-12	2.11E-10
Gm42115	46.76154998	4.773111716	0.700534898	6.813524533	9.52E-12	2.11E-10
Gpc4	465.1713389	-2.882934104	0.42311946	-6.813522834	9.52E-12	2.11E-10
C920006O11Rik	224.4103053	1.967529518	0.288832947	6.811998211	9.63E-12	2.13E-10
Gm42089	8.919134574	6.33378042	0.929967872	6.810751869	9.71E-12	2.15E-10
Fam135b	566.2340238	4.947781974	0.726549102	6.809976035	9.76E-12	2.16E-10
Myh9	1909.558842	-1.288754723	0.189300965	-6.807967013	9.90E-12	2.19E-10
Obox6	13.40965102	5.195521004	0.763220967	6.807361469	9.94E-12	2.20E-10
Tmem215	464.6062928	4.596204037	0.675188321	6.807291972	9.95E-12	2.20E-10
Map4k3	4516.752158	1.631448497	0.23973331	6.805264133	1.01E-11	2.23E-10
Gm16322	72.20316105	3.988792581	0.586222071	6.80423474	1.02E-11	2.24E-10
Kcnj14	1439.412679	7.36443156	1.082488236	6.803243969	1.02E-11	2.25E-10
Rabgap1l	1752.382177	1.964291232	0.288993887	6.796999237	1.07E-11	2.35E-10
Lrrk1	110.8424671	-2.622796152	0.38592732	-6.796088328	1.07E-11	2.36E-10
Adat1	221.33113	-1.764056048	0.259637568	-6.79430201	1.09E-11	2.39E-10
Wdr12	626.4052435	-0.999422579	0.147148509	-6.791931424	1.11E-11	2.43E-10
Alx1	10.11707034	-7.344964358	1.081962314	-6.7885584	1.13E-11	2.48E-10
Tex14	50.69478918	3.578039325	0.52708927	6.788298543	1.13E-11	2.48E-10
Myo1g	196.3752158	4.817985322	0.709741417	6.788367153	1.13E-11	2.48E-10
Stxbp5l	1140.463723	3.192760468	0.470417616	6.787076758	1.14E-11	2.50E-10
Gm36117	154.3554397	1.841948784	0.271468595	6.785126602	1.16E-11	2.53E-10
Dgke	4822.478065	3.432065277	0.505875345	6.784409068	1.17E-11	2.54E-10
Hcn2	157.331265	2.90081022	0.427787406	6.780962175	1.19E-11	2.60E-10
Gm41262	14.16671702	6.626770913	0.977453729	6.779626203	1.20E-11	2.62E-10
Ppcs	81.64068552	-1.280596061	0.188890799	-6.779557645	1.21E-11	2.62E-10
Gm32856	124.7061914	-2.045882903	0.301783467	-6.779307435	1.21E-11	2.63E-10
Caly	171.2457784	4.148185018	0.611966868	6.778447064	1.21E-11	2.64E-10
Tnfrsf22	76.11143793	-2.625175206	0.387484865	-6.774910313	1.24E-11	2.70E-10
E230016M11Rik	257.1890789	2.474039437	0.365205662	6.774373169	1.25E-11	2.71E-10
Opn3	61.5716343	-2.80712262	0.414416879	-6.773668652	1.26E-11	2.72E-10
U90926	7.844071072	6.160763622	0.909808925	6.771491741	1.27E-11	2.76E-10
Ccndbp1	3059.562379	2.294709453	0.338943248	6.77018784	1.29E-11	2.78E-10
Gm38673	6.767520068	5.505757639	0.813299934	6.769652141	1.29E-11	2.79E-10
Twist1	15.28634612	-6.216557012	0.918346316	-6.769294874	1.29E-11	2.80E-10
A930033H14Rik	537.9370494	3.275799939	0.483964194	6.768682435	1.30E-11	2.80E-10
Gareml	82.76286376	-2.912371237	0.430315847	-6.767985087	1.31E-11	2.82E-10
Ablim2	188.9448569	4.478052199	0.661824401	6.766224083	1.32E-11	2.85E-10
BC048546	16.10832693	7.182294115	1.061762315	6.764502763	1.34E-11	2.88E-10
Clic3	80.24418093	2.231919214	0.32994908	6.764435331	1.34E-11	2.88E-10
Gm33074	1.688937556	-3.902219666	0.577267559	-6.759811128	1.38E-11	2.97E-10
Tacr3	241.3910548	3.635778582	0.537975775	6.75825707	1.40E-11	3.00E-10
Plcz1	12.69496139	6.399593038	0.946980201	6.757895291	1.40E-11	3.00E-10
AI463170	20.86312534	5.569782308	0.824210009	6.757722237	1.40E-11	3.00E-10
Cdc25a	606.6975048	-2.912917798	0.431066074	-6.757474024	1.40E-11	3.01E-10
Lrig3	125.6703602	-2.343900565	0.34690889	-6.756530706	1.41E-11	3.02E-10
Fcgbp	20.96806026	4.10997965	0.608479794	6.754504739	1.43E-11	3.06E-10
Nop14	630.1031941	-0.9605123	0.142237776	-6.752863595	1.45E-11	3.10E-10
Gm40270	6.102780902	-3.566547173	0.528362037	-6.750195746	1.48E-11	3.15E-10
Lacc1	72.60445557	-2.573949388	0.381418135	-6.748366558	1.50E-11	3.19E-10
Mapk15	46.98638742	2.171388153	0.321870839	6.746147482	1.52E-11	3.23E-10
Uckl1	3226.823852	3.218293025	0.47711861	6.745268276	1.53E-11	3.25E-10
Slc18a3	47.54804019	4.572859584	0.678148465	6.743154076	1.55E-11	3.30E-10
Magi2	929.1138277	1.896271948	0.28125838	6.742099381	1.56E-11	3.32E-10
Rab38	58.00515655	-3.867501855	0.57365082	-6.741909398	1.56E-11	3.32E-10
Fastkd5	309.975095	-0.982387565	0.145729394	-6.741176497	1.57E-11	3.33E-10
Slc47a2	15.39066698	4.916261548	0.729392403	6.740214903	1.58E-11	3.35E-10
Als2cr11	31.21263733	6.979241174	1.035592443	6.739370513	1.59E-11	3.37E-10
Fkbp9	700.7553145	-2.198029691	0.326391219	-6.734340771	1.65E-11	3.48E-10
Pitpnm1	17170.46354	2.883935626	0.428241953	6.734360343	1.65E-11	3.48E-10
Ttll3	547.1317348	2.085235103	0.309842711	6.729979537	1.70E-11	3.58E-10
Yeats2	1669.746343	-1.093881498	0.162662357	-6.724859513	1.76E-11	3.71E-10
Apod	52.05805514	3.034355687	0.451318728	6.723309939	1.78E-11	3.75E-10
X1500009C09Rik	159.3527825	4.261238723	0.633844042	6.722850487	1.78E-11	3.76E-10
Il17ra	84.7010974	-0.916383608	0.13634621	-6.72100537	1.80E-11	3.80E-10
Nme2	1184.650167	-2.322947525	0.345674114	-6.720050559	1.82E-11	3.82E-10
LOC108168393	15.44592111	3.406433186	0.507180404	6.716413253	1.86E-11	3.91E-10
Ccdc87	58.34558344	3.369087771	0.501649116	6.716024532	1.87E-11	3.92E-10
Gm10857	51.07679567	5.7056793	0.84959554	6.715759481	1.87E-11	3.93E-10
Kdelc2	141.5996079	-1.718801021	0.256015024	-6.713672486	1.90E-11	3.98E-10
Gabrr2	273.9598187	5.670653615	0.844687841	6.713312708	1.90E-11	3.99E-10
Fam89a	289.0808767	2.687188836	0.400410578	6.711083535	1.93E-11	4.04E-10
Fam126b	3333.802451	2.094506862	0.312253543	6.70771207	1.98E-11	4.13E-10
Zfp335os	270.8498075	0.7338446	0.109482548	6.702845452	2.04E-11	4.27E-10
Gm13830	88.83147803	2.427977943	0.362377177	6.700140349	2.08E-11	4.35E-10
Pth1r	82.00996534	-2.815239017	0.420315303	-6.697921773	2.11E-11	4.41E-10
X9530082P21Rik	41.48595958	1.921546472	0.286910239	6.697378523	2.12E-11	4.42E-10
Gm41640	107.902538	6.021176924	0.899158478	6.696457935	2.14E-11	4.45E-10
A830092H15Rik	256.3791899	-3.288477492	0.491506107	-6.690613702	2.22E-11	4.62E-10
Actc1	66.56721718	3.539240252	0.529066002	6.689600618	2.24E-11	4.65E-10
Tcof1	907.3510171	-1.363342694	0.203900788	-6.686304182	2.29E-11	4.75E-10
Gnb5	7815.406857	4.079537805	0.610165502	6.685952894	2.29E-11	4.76E-10
Aloxe3	53.72180732	3.846917171	0.575463878	6.684897734	2.31E-11	4.79E-10
Prtg	799.3111191	-2.071737882	0.309958958	-6.683910325	2.33E-11	4.82E-10
Gm36286	17.77658224	4.120594176	0.616576753	6.683019034	2.34E-11	4.85E-10
Rab43	952.24302	1.471841482	0.220436359	6.676945171	2.44E-11	5.05E-10
AI839979	27.24257778	2.056958676	0.308169999	6.674753156	2.48E-11	5.12E-10
Galnt4	1280.77647	2.86037293	0.428855267	6.669786168	2.56E-11	5.29E-10
Pcdhb13	102.2451971	3.024771079	0.453688984	6.667058682	2.61E-11	5.39E-10
Gm8234	135.7644171	2.892892749	0.434145159	6.663422794	2.68E-11	5.52E-10
BC025920	314.3389643	1.222513247	0.18348663	6.662682994	2.69E-11	5.54E-10
Kifc2	524.0220815	2.507970971	0.376644042	6.658729978	2.76E-11	5.68E-10
Rhot1	6645.93246	2.198647591	0.330194282	6.658648282	2.76E-11	5.68E-10
Stxbp1	18156.71334	2.791304632	0.419289362	6.657227401	2.79E-11	5.73E-10
Atp6v1g2	895.4214965	2.392417052	0.359385537	6.656965316	2.80E-11	5.74E-10
Vmn2r.ps11	2.095654788	-5.212057509	0.783186556	-6.654937409	2.83E-11	5.81E-10
Slc5a1	31.61771194	6.992522726	1.050730862	6.654913239	2.83E-11	5.81E-10
Gpatch2l	1892.820891	1.448595731	0.217666106	6.655127689	2.83E-11	5.81E-10
Gm36875	45.73257297	5.006049542	0.752394711	6.653488477	2.86E-11	5.86E-10
Vmn2r7	1.882765813	-4.391168167	0.660268579	-6.650578728	2.92E-11	5.97E-10
Grrp1	31.2005965	-2.933617968	0.441128133	-6.650262701	2.93E-11	5.98E-10
LOC108168070	8.31020311	6.240341382	0.938421235	6.649829679	2.93E-11	5.99E-10
Raver1	719.9700529	-1.360013407	0.204608681	-6.646899842	2.99E-11	6.11E-10
Pclo	4813.972369	2.288938611	0.344396863	6.64622375	3.01E-11	6.13E-10
Gm35394	39.87991785	-2.598586605	0.391025076	-6.645575352	3.02E-11	6.15E-10
Rasl11b	98.35427769	-2.338582823	0.351938281	-6.644866293	3.03E-11	6.18E-10
Pdia6	3621.741117	-1.417811194	0.213379297	-6.644558371	3.04E-11	6.18E-10
Grin1	306.8827325	4.308078149	0.648563345	6.642494038	3.08E-11	6.27E-10
Rrp12	588.5069077	-1.189295926	0.179101038	-6.640363123	3.13E-11	6.35E-10
A330023F24Rik	701.285302	4.568185711	0.689033295	6.629847563	3.36E-11	6.82E-10
Adamts3	1076.587336	3.759547629	0.567112508	6.629280036	3.37E-11	6.84E-10
Ppm1m	171.2716709	-1.878778397	0.283499065	-6.627106139	3.42E-11	6.93E-10
Snx9	401.4057858	-1.176401866	0.177548185	-6.625817465	3.45E-11	6.99E-10
Gm40035	1.887348583	-4.492567807	0.678163832	-6.624605431	3.48E-11	7.04E-10
Gm39423	61.84036201	1.771404484	0.267424579	6.623940442	3.50E-11	7.07E-10
Slc25a35	280.6069548	4.648441939	0.701849436	6.623132684	3.52E-11	7.10E-10
X4732414G09Rik	10.79171849	4.57981211	0.692000399	6.618221778	3.64E-11	7.33E-10
Gm8013	13.94950309	5.190534797	0.784320002	6.617878909	3.64E-11	7.34E-10
LOC108167420	33.04914436	2.895510432	0.437754836	6.614456747	3.73E-11	7.51E-10
Gm30684	39.45314403	4.9133159	0.742883651	6.613843088	3.74E-11	7.53E-10
Lrrc46	233.9683012	3.560913125	0.538521702	6.612385552	3.78E-11	7.60E-10
Slc46a3	331.5328628	3.070222881	0.46441738	6.610912975	3.82E-11	7.67E-10
Gm16793	48.11442772	3.385496466	0.512129817	6.610621669	3.83E-11	7.68E-10
Impdh1	14889.28291	4.543148195	0.687633526	6.606932362	3.92E-11	7.87E-10
Calml4	48.39512909	4.553072477	0.689705067	6.601477491	4.07E-11	8.16E-10
Gm33280	3.583656174	-2.606420018	0.39488608	-6.60043529	4.10E-11	8.21E-10
Gm36360	2.747812814	-2.976766172	0.451013279	-6.600174119	4.11E-11	8.21E-10
Wasf2	717.7362873	-1.53530019	0.232617184	-6.600115099	4.11E-11	8.21E-10
Gm11266	82.66500821	3.318291826	0.502919954	6.598051638	4.17E-11	8.32E-10
X2010204K13Rik	31.17750042	-1.829491307	0.277291519	-6.597718219	4.18E-11	8.33E-10
LOC102640526	35.43646215	1.840689191	0.279133814	6.594289534	4.27E-11	8.52E-10
Gprin3	649.2775155	2.688986523	0.407905744	6.592176163	4.33E-11	8.64E-10
Adprhl1	36.92408124	5.762652055	0.874284682	6.59127647	4.36E-11	8.68E-10
Adpgk	459.5670537	-0.909690331	0.138020344	-6.590987251	4.37E-11	8.69E-10
Atp6v0a1	4924.678934	1.852579408	0.281138866	6.589552834	4.41E-11	8.77E-10
Kyat3	81.46932466	-1.375278724	0.208752286	-6.588089396	4.46E-11	8.84E-10
Cds1	2957.805417	5.677785037	0.861811903	6.588195192	4.45E-11	8.84E-10
Gm31546	8.642586375	2.718397194	0.412758925	6.585919837	4.52E-11	8.97E-10
Nop56	1755.642758	-1.45973549	0.221653409	-6.585666768	4.53E-11	8.97E-10
Cartpt	233.610147	5.255802449	0.798506587	6.582040193	4.64E-11	9.19E-10
Slc5a2	27.22527911	6.515712951	0.989971847	6.581715398	4.65E-11	9.20E-10
Ttll13	60.41371593	2.495453273	0.379164829	6.581447114	4.66E-11	9.21E-10
X1700071M16Rik	92.09542002	3.449051972	0.524311259	6.578252729	4.76E-11	9.40E-10
Ly75	98.25408497	-2.695549013	0.409774802	-6.578122907	4.76E-11	9.40E-10
Orc1	153.5936721	-2.317892216	0.352415199	-6.577163028	4.80E-11	9.46E-10
Mybphl	27.76361602	4.045525358	0.615203579	6.575913234	4.84E-11	9.53E-10
Kpnb1	9203.970709	-1.956556416	0.297539518	-6.575786727	4.84E-11	9.53E-10
LOC108167796	86.39406628	2.421839558	0.368331692	6.575159323	4.86E-11	9.56E-10
Gpx3	127.6098352	-2.619985298	0.398765022	-6.570248523	5.02E-11	9.88E-10
Atoh7	1849.871144	-6.02387303	0.917873656	-6.562856435	5.28E-11	1.04E-09
A930027H12Rik	18.976996	5.667604185	0.863746734	6.561650498	5.32E-11	1.04E-09
Hmcn2	162.2300915	5.284278465	0.805780177	6.55796533	5.45E-11	1.07E-09
Prrx2	13.41168238	-5.137603301	0.783633097	-6.556133627	5.52E-11	1.08E-09
Fam198b	59.34984894	-4.478775339	0.683343066	-6.554212024	5.59E-11	1.09E-09
Scand1	287.8025939	6.979798109	1.064919503	6.554296443	5.59E-11	1.09E-09
Zfp473	61.83322032	-1.597994401	0.243925708	-6.551152055	5.71E-11	1.12E-09
Gm36157	21.95880246	3.941609587	0.601716804	6.550605798	5.73E-11	1.12E-09
Gm12996	50.52281029	3.764680414	0.574908416	6.548313284	5.82E-11	1.14E-09
Rgcc	31.40908397	1.946542335	0.297337809	6.546568511	5.89E-11	1.15E-09
Rora	5615.146184	2.826046269	0.431677675	6.546658375	5.88E-11	1.15E-09
Hip1	2761.728557	-1.399129048	0.213751786	-6.545578289	5.93E-11	1.15E-09
LOC108167738	231.7201878	3.115559191	0.476104441	6.543856603	6.00E-11	1.17E-09
Timm8a1	57.08678962	-1.526548841	0.233331663	-6.542399024	6.05E-11	1.18E-09
Tnfaip3	2042.398173	5.376626521	0.821981122	6.541058399	6.11E-11	1.19E-09
Tbc1d1	399.8840032	-2.176481486	0.332883072	-6.538276254	6.22E-11	1.21E-09
Ybey	118.3737804	-1.134980613	0.173622123	-6.537073674	6.27E-11	1.22E-09
Rgr	180.5144242	4.099542896	0.627387709	6.534305405	6.39E-11	1.24E-09
Gnmt	36.79106249	2.411941677	0.369146495	6.533833341	6.41E-11	1.24E-09
Vcan	1506.597625	-3.837686331	0.587418106	-6.533142729	6.44E-11	1.25E-09
Ikzf1	31.51848289	-2.684135376	0.411060806	-6.529776954	6.59E-11	1.27E-09
Cryaa	3036.467022	-7.204186891	1.103453305	-6.528764611	6.63E-11	1.28E-09
Gm30223	54.05208454	5.504623036	0.84350121	6.525921919	6.76E-11	1.30E-09
Antxr2	268.3843513	-1.784281163	0.273413673	-6.525939764	6.76E-11	1.30E-09
LOC108168326	7.022459253	-3.56844361	0.547518341	-6.517486887	7.15E-11	1.38E-09
Ccdc160	48.67295516	-1.731853967	0.265753461	-6.516769197	7.18E-11	1.38E-09
Pou3f3	43.11272224	3.291336762	0.505298092	6.513653648	7.33E-11	1.41E-09
Map2k3	343.0357332	-1.847608497	0.283682943	-6.512934743	7.37E-11	1.42E-09
Nxph3	66.9387616	2.633777643	0.404557467	6.510268273	7.50E-11	1.44E-09
Acbd4	269.8926023	3.487880266	0.535759072	6.51016557	7.51E-11	1.44E-09
Trak1	2633.764773	2.605234835	0.400173469	6.510263769	7.50E-11	1.44E-09
Fgf3	136.6958845	-4.069202296	0.625071837	-6.509975426	7.52E-11	1.44E-09
Atf7ip2	8.325628091	-3.554048042	0.546126968	-6.507732182	7.63E-11	1.46E-09
Gm39762	23.49576812	-1.657443485	0.254779287	-6.505409083	7.75E-11	1.48E-09
F630040K05Rik	255.7720565	4.283950407	0.658670567	6.503934777	7.82E-11	1.50E-09
Elac1	1208.314021	1.496526561	0.230113382	6.503431248	7.85E-11	1.50E-09
Fcamr	31.94338672	7.441693368	1.144329383	6.503104334	7.87E-11	1.50E-09
Gm34029	22.17722609	5.428664276	0.834910905	6.502088117	7.92E-11	1.51E-09
LOC108167346	5.278737505	-2.889400026	0.444585511	-6.499087254	8.08E-11	1.54E-09
Foxp2	315.3704319	-2.984732851	0.459259213	-6.499015736	8.08E-11	1.54E-09
Tufm	633.2614378	-1.071959288	0.164941978	-6.499008341	8.09E-11	1.54E-09
Gm38902	5.573712313	5.641608053	0.868296016	6.49733265	8.18E-11	1.56E-09
Nos3	210.8552658	3.430938694	0.528063951	6.497203013	8.18E-11	1.56E-09
Rhpn1	1038.655634	2.927311438	0.45056835	6.496930901	8.20E-11	1.56E-09
Stap2	40.84051799	-1.209255186	0.18619177	-6.494675821	8.32E-11	1.58E-09
Mcf2l	4566.858214	1.989869717	0.306427701	6.493765773	8.37E-11	1.59E-09
Tnip2	223.1066723	1.77080181	0.272700654	6.49357375	8.38E-11	1.59E-09
Cirh1a	754.6233044	-1.29386692	0.199276305	-6.492828736	8.42E-11	1.60E-09
Col1a2	216.3690787	-3.142092359	0.483995855	-6.491981961	8.47E-11	1.60E-09
LOC101055782	20.90625788	7.554441272	1.164053667	6.489770603	8.60E-11	1.63E-09
Grm1	196.7442879	4.696022879	0.72365459	6.489315402	8.62E-11	1.63E-09
Ntng2	1301.832325	3.46168511	0.533649255	6.486817098	8.77E-11	1.66E-09
Pcdha10	37.96298442	2.395002328	0.369220987	6.486636492	8.78E-11	1.66E-09
Snora33	15.1502688	-1.890957268	0.291702089	-6.48249478	9.02E-11	1.70E-09
Pde1a	75.10792848	4.683080298	0.72242272	6.482465418	9.02E-11	1.70E-09
Pdss2	241.738471	-0.440756537	0.068015237	-6.480261727	9.16E-11	1.72E-09
Gm42226	89.48190953	-2.867270718	0.442608364	-6.478121406	9.29E-11	1.75E-09
Ptpn20	15.6722586	2.389827903	0.368945851	6.477448921	9.33E-11	1.75E-09
Kcnk3	191.3009849	3.654650597	0.564456059	6.474641449	9.50E-11	1.79E-09
Gm30189	104.1529559	-1.972116268	0.304717009	-6.47195991	9.67E-11	1.82E-09
Clcn5	994.6518653	-1.79828615	0.277917413	-6.470577456	9.76E-11	1.83E-09
Nfic	2216.097461	2.951413631	0.456233803	6.46908145	9.86E-11	1.85E-09
Hagh	1217.958856	2.599807778	0.401955843	6.467893986	9.94E-11	1.86E-09
X4933429O19Rik	42.7993688	4.534089551	0.701217328	6.466026111	1.01E-10	1.88E-09
Gm38830	149.2270505	2.141036197	0.331333457	6.461877459	1.03E-10	1.93E-09
Hopx	381.0292634	1.963548649	0.303961192	6.459866264	1.05E-10	1.96E-09
A330041J22Rik	16.90969043	3.635205317	0.562865496	6.458390757	1.06E-10	1.98E-09
Zfp65	437.3522493	-1.045786367	0.161974117	-6.456502969	1.07E-10	2.00E-09
Mmp9	81.11596032	4.331564032	0.670950278	6.455864427	1.08E-10	2.01E-09
Nr2f1	972.4720387	-2.851236012	0.441686506	-6.455338744	1.08E-10	2.01E-09
Sptb	1494.136075	1.796452826	0.278421593	6.452275519	1.10E-10	2.05E-09
Ston1	81.07051593	-2.220290023	0.344181013	-6.450936982	1.11E-10	2.07E-09
X9530080O11Rik	13.2395701	2.925717499	0.453560826	6.450551567	1.11E-10	2.07E-09
Gm36743	12.75032313	3.249946528	0.503937346	6.449108311	1.13E-10	2.09E-09
Lmntd2	64.91216191	-1.976603134	0.30651878	-6.448554755	1.13E-10	2.10E-09
Gm20939	19.62291218	-2.629140436	0.407748899	-6.447940007	1.13E-10	2.10E-09
Shpk	99.25993769	2.088787062	0.324086029	6.445162318	1.15E-10	2.14E-09
Gdpd5	1981.977879	2.632774013	0.408709183	6.441680588	1.18E-10	2.19E-09
Shc1	435.6606033	-1.978160349	0.307184682	-6.43964515	1.20E-10	2.22E-09
Bmp4	32.11690638	-3.455614613	0.53666872	-6.439008804	1.20E-10	2.22E-09
Neurod6	13.80656882	4.796301938	0.745080092	6.437297134	1.22E-10	2.25E-09
Chrng	13.87284443	-7.144119323	1.110193151	-6.435023775	1.23E-10	2.28E-09
Zrsr1	560.1674564	2.060361244	0.320327443	6.43204723	1.26E-10	2.32E-09
Efna5	867.8793421	-2.723483855	0.423451649	-6.43162888	1.26E-10	2.33E-09
Ncoa1	7052.926454	2.661692451	0.413838227	6.431722046	1.26E-10	2.33E-09
Vip	46.63727049	8.70946995	1.354618961	6.429461125	1.28E-10	2.36E-09
A930015D03Rik	115.3506481	2.908448856	0.452360059	6.429499687	1.28E-10	2.36E-09
Dbndd2	951.8823115	3.376220995	0.525246221	6.427882502	1.29E-10	2.38E-09
Flrt2	1553.814117	-3.069427664	0.477580637	-6.427035415	1.30E-10	2.39E-09
Gm11418	16.05904504	5.944701138	0.925020803	6.426559398	1.31E-10	2.40E-09
Gpm6b	10595.3039	2.633760813	0.409902582	6.425333549	1.32E-10	2.41E-09
Atp11b	5467.486541	1.621902841	0.252551149	6.422076655	1.34E-10	2.46E-09
Sdc1	315.4960558	-4.182672846	0.651840164	-6.416715437	1.39E-10	2.55E-09
Tgfbr3l	201.4676929	2.366714233	0.368955215	6.414638245	1.41E-10	2.58E-09
Rhbdf2	539.2745663	2.674072198	0.416965754	6.413169846	1.43E-10	2.61E-09
Slc1a2	7796.881982	3.526857376	0.55028873	6.409103411	1.46E-10	2.68E-09
Zfp112	130.7976286	0.919179335	0.143430142	6.408550666	1.47E-10	2.68E-09
Cnot9	1681.883954	-1.378111558	0.215057059	-6.408120536	1.47E-10	2.69E-09
Matn3	14.03253172	-5.841930492	0.911868544	-6.406548981	1.49E-10	2.71E-09
Gprc5a	8.664283556	-5.098569556	0.795990051	-6.405318196	1.50E-10	2.73E-09
Lmx1b	16.33808603	-6.128864899	0.957082544	-6.403695209	1.52E-10	2.76E-09
Dynlrb2	125.5693243	4.553281831	0.711263868	6.401677405	1.54E-10	2.79E-09
Pcdhb17	606.1709671	2.258301741	0.352766323	6.401693113	1.54E-10	2.79E-09
Pcbp3	5987.426537	2.145198355	0.335519734	6.393657775	1.62E-10	2.94E-09
Gm26559	101.4068694	2.793373654	0.436982223	6.392419436	1.63E-10	2.96E-09
Glt28d2	238.7641043	4.063094499	0.635990808	6.388605698	1.67E-10	3.04E-09
Gm41286	10.77324312	3.576801319	0.560039897	6.38669019	1.70E-10	3.07E-09
Akr1c13	10.53412562	3.731297078	0.584361704	6.385252578	1.71E-10	3.10E-09
Gm30515	25.83203349	-2.541430729	0.398336587	-6.380108711	1.77E-10	3.20E-09
Bms1	1914.043215	-0.758036358	0.118814487	-6.379999416	1.77E-10	3.20E-09
Itga4	2011.435711	2.005768469	0.314395971	6.379752451	1.77E-10	3.21E-09
X0610040B10Rik	48.90353863	1.703295976	0.267026875	6.378743621	1.79E-10	3.23E-09
Card19	305.0218729	3.406439533	0.534065057	6.378323185	1.79E-10	3.23E-09
Hlf	1684.479031	3.403615535	0.533699988	6.377394811	1.80E-10	3.25E-09
Gimap9	9.217515266	-2.937745644	0.460784712	-6.375527586	1.82E-10	3.29E-09
Catsper2	167.2262663	1.104593104	0.173296731	6.3739985	1.84E-10	3.32E-09
H60b	8.181916282	-2.595708076	0.40747673	-6.370199539	1.89E-10	3.39E-09
Atp13a4	20.43616172	5.959386061	0.935511022	6.37019332	1.89E-10	3.39E-09
X4930405A21Rik	83.21197862	2.820146749	0.442708915	6.370205458	1.89E-10	3.39E-09
Gpr84	26.87928811	2.484500937	0.390164801	6.367824393	1.92E-10	3.44E-09
Ube2l6	80.13232807	-2.577840344	0.404878768	-6.366943755	1.93E-10	3.46E-09
Aprt	378.7101805	-1.924991995	0.302414191	-6.36541555	1.95E-10	3.49E-09
Gm13889	81.37312264	3.049448404	0.479436331	6.360486691	2.01E-10	3.60E-09
Gm41553	82.14408814	-2.019680335	0.317609264	-6.359009535	2.03E-10	3.64E-09
Gm41572	216.662715	4.056317379	0.638111364	6.356754647	2.06E-10	3.69E-09
Ldah	775.6118013	-0.815465737	0.128285829	-6.356631451	2.06E-10	3.69E-09
LOC108168296	106.8907714	2.461884735	0.387382136	6.35518396	2.08E-10	3.72E-09
Pla2g4e	52.69603102	4.103710197	0.645887887	6.353595226	2.10E-10	3.76E-09
Gstm2	17.18704521	-3.300470387	0.519704217	-6.350670786	2.14E-10	3.83E-09
Rab7b	21.51559083	2.689857803	0.423579732	6.350298652	2.15E-10	3.83E-09
Prkab1	3527.673235	2.538980231	0.399920161	6.348717762	2.17E-10	3.87E-09
Bbof1	253.1180392	1.590933968	0.250775394	6.344059292	2.24E-10	3.98E-09
Cryba4	93.88059427	-5.24416785	0.826657568	-6.343821254	2.24E-10	3.99E-09
Vps13a	1274.215942	-1.283305884	0.202294006	-6.34376622	2.24E-10	3.99E-09
F13a1	12.12260449	-3.842370634	0.60579836	-6.34265605	2.26E-10	4.01E-09
Polr1c	927.700502	-1.25159105	0.197338134	-6.342367913	2.26E-10	4.02E-09
Gm41756	27.92016712	5.387504148	0.849555763	6.341554473	2.27E-10	4.04E-09
LOC102631979	655.113508	-2.67325185	0.421797715	-6.337758024	2.33E-10	4.13E-09
Gm8493	57.88802106	4.099473994	0.646998461	6.336141806	2.36E-10	4.17E-09
Gm31764	8.398611474	2.977553519	0.469948432	6.335915427	2.36E-10	4.18E-09
Gm41696	23.07156456	2.138361233	0.337681723	6.332475478	2.41E-10	4.27E-09
Ms4a6b	6.599819593	-3.218811212	0.508383454	-6.331463367	2.43E-10	4.29E-09
Snhg18	90.95417796	-1.517001924	0.239632853	-6.330525665	2.44E-10	4.32E-09
Morf4l1b	140.2892206	-1.354337303	0.213975822	-6.329394101	2.46E-10	4.35E-09
Rab29	48.09574846	-1.133088249	0.179095195	-6.326737277	2.50E-10	4.42E-09
Sbspon	130.6625298	2.881118579	0.455472583	6.325558734	2.52E-10	4.45E-09
Gm16124	106.0353474	3.835918693	0.606442062	6.3252847	2.53E-10	4.45E-09
Gm3264	4.230842346	-3.822813159	0.604603942	-6.322838631	2.57E-10	4.52E-09
Mrpl19	604.6134038	-1.370007902	0.216694042	-6.32231459	2.58E-10	4.53E-09
Kctd14	20.76362652	2.139581943	0.338467404	6.321382546	2.59E-10	4.56E-09
Kcnab3	298.6022468	2.340007223	0.370216399	6.320647144	2.60E-10	4.58E-09
Gm33663	6.301783053	-3.341463737	0.528808471	-6.318854411	2.64E-10	4.63E-09
Ndrg3	13504.28377	3.559973469	0.563506857	6.317533534	2.66E-10	4.66E-09
X4930554H23Rik	6.565616509	5.916801385	0.936818215	6.315847932	2.69E-10	4.71E-09
Sntg2	205.6865675	5.303753421	0.841060244	6.306032722	2.86E-10	5.02E-09
Gm36532	19.89511921	4.88308314	0.774581476	6.304156877	2.90E-10	5.07E-09
Pus7l	119.9870364	-1.39402155	0.221135653	-6.303920392	2.90E-10	5.08E-09
D630045M09Rik	2.098499673	-4.179923278	0.663582699	-6.299023895	3.00E-10	5.23E-09
Loxl1	51.79389625	-2.202881527	0.349713754	-6.299098912	2.99E-10	5.23E-09
Cdc42ep3	693.3310503	2.57881664	0.409390225	6.299165149	2.99E-10	5.23E-09
Tusc5	228.0638	5.250454903	0.834059913	6.295057254	3.07E-10	5.36E-09
Golm1	1334.192583	-2.996840792	0.476082122	-6.294797999	3.08E-10	5.37E-09
LOC102639700	39.98336638	-1.720805887	0.27340192	-6.294051959	3.09E-10	5.39E-09
Haus6	1088.272059	-1.719794062	0.273416784	-6.290009111	3.17E-10	5.53E-09
Slc25a39	864.6212345	-1.33871813	0.212836949	-6.289876528	3.18E-10	5.53E-09
Magef1	660.9355249	1.923869481	0.306000301	6.287148992	3.23E-10	5.62E-09
Dnmt1	3787.201894	-1.503690696	0.239227386	-6.285612704	3.27E-10	5.67E-09
Nxph1	137.6360384	4.169179255	0.663338397	6.285146882	3.28E-10	5.69E-09
Hk1	11260.6845	3.583561169	0.570194757	6.284802031	3.28E-10	5.69E-09
Gm29831	3.405125098	-3.310275083	0.526967894	-6.281739585	3.35E-10	5.80E-09
Rest	435.0175382	-1.976311337	0.31477926	-6.278403915	3.42E-10	5.93E-09
Ppip5k1	2515.368882	2.644805651	0.421467429	6.275231418	3.49E-10	6.04E-09
Snrk	4351.021883	2.80414576	0.446856346	6.275273439	3.49E-10	6.04E-09
Gm31369	4.880573376	-3.82607256	0.609786639	-6.27444472	3.51E-10	6.07E-09
Gm39465	9.013663999	5.830748218	0.929544002	6.272697373	3.55E-10	6.13E-09
Cnn2	93.45261256	-3.090701166	0.492792268	-6.271813436	3.57E-10	6.16E-09
Gm38948	13.54446139	-2.022491642	0.322523933	-6.270826542	3.59E-10	6.19E-09
Ppp2r1b	882.0909132	-2.588757608	0.412824914	-6.270836671	3.59E-10	6.19E-09
Col4a6	274.1898882	-2.906990486	0.46368929	-6.26926381	3.63E-10	6.25E-09
Gm36461	405.221686	3.545158358	0.565485848	6.269225611	3.63E-10	6.25E-09
Rftn2	159.9375871	2.632475632	0.419984498	6.268030476	3.66E-10	6.29E-09
Smim3	129.6499861	-2.364254602	0.377226349	-6.26746941	3.67E-10	6.31E-09
Usp20	981.1591567	0.9244661	0.147531848	6.266213801	3.70E-10	6.36E-09
Efnb2	1843.520525	-2.107286844	0.336302849	-6.266039237	3.70E-10	6.36E-09
Ppip5k2	1491.154445	-1.267811929	0.202371929	-6.264761791	3.73E-10	6.41E-09
Etl4	656.6559296	-2.967248843	0.473783306	-6.262881801	3.78E-10	6.48E-09
Mcm8	446.0730094	-1.623345456	0.259224687	-6.262310415	3.79E-10	6.50E-09
Gm13251	50.27105933	-1.691424607	0.270187866	-6.260179746	3.85E-10	6.58E-09
Rbl2	1450.409931	1.614616549	0.257974808	6.25881481	3.88E-10	6.64E-09
Wdsub1	213.7189415	-1.008713837	0.161222956	-6.256639022	3.93E-10	6.73E-09
Gm41308	17.29046439	3.82209914	0.61101238	6.255354662	3.97E-10	6.78E-09
Cdk5r2	1775.37021	4.369531211	0.698743535	6.253412006	4.02E-10	6.86E-09
Gsn	88.745157	-2.6233245	0.419549218	-6.252721701	4.03E-10	6.88E-09
Cygb	589.0612434	3.154456473	0.504529561	6.252272848	4.05E-10	6.90E-09
Myof	435.7418604	3.29520656	0.527291269	6.249309928	4.12E-10	7.02E-09
Gm39424	21.77417825	3.275772864	0.524427015	6.246384661	4.20E-10	7.15E-09
Snap91	5662.911905	2.848380177	0.45601756	6.246207225	4.21E-10	7.16E-09
Rab26os	56.29837726	-1.402542381	0.224599245	-6.244644248	4.25E-10	7.22E-09
Lins1	490.7229096	-0.731911134	0.117222918	-6.243754599	4.27E-10	7.26E-09
Nr1h4	36.21269196	6.625783184	1.061239928	6.243435636	4.28E-10	7.27E-09
Rrp15	399.5241402	-1.444453435	0.231526177	-6.238834205	4.41E-10	7.48E-09
Gm34111	61.45675477	3.218479873	0.515900233	6.238570305	4.42E-10	7.49E-09
Kank1	1357.097931	2.293613484	0.367704466	6.237654684	4.44E-10	7.53E-09
Adam32	25.85318911	3.128287234	0.501595472	6.236673585	4.47E-10	7.57E-09
LOC108167361	43.26849169	5.221803503	0.837644015	6.233917285	4.55E-10	7.69E-09
Mt3	61.65100766	3.477523149	0.557835515	6.233957954	4.55E-10	7.69E-09
Tob2	4084.884912	2.987549727	0.479250233	6.233799219	4.55E-10	7.69E-09
Ston2	2589.612836	-2.395022585	0.384228219	-6.233333384	4.57E-10	7.71E-09
X1500012K07Rik	38.41919039	5.039398473	0.808487795	6.233116323	4.57E-10	7.72E-09
X4930419G24Rik	11.13433666	6.285694948	1.008783577	6.230964786	4.64E-10	7.82E-09
Tmprss5	67.13391463	2.907748982	0.466759157	6.229655995	4.67E-10	7.88E-09
Raet1d	20.05723769	-4.417352114	0.709216501	-6.228495962	4.71E-10	7.93E-09
Ccdc92b	328.0544643	1.917994085	0.307996075	6.22733289	4.74E-10	7.99E-09
Zbtb7b	610.5041527	2.84199677	0.456393655	6.227073356	4.75E-10	7.99E-09
Apon	5.227170644	-3.973267536	0.638227579	-6.22547139	4.80E-10	8.07E-09
Sass6	518.6950593	-1.502894009	0.241426908	-6.22504767	4.81E-10	8.09E-09
Nop2	794.5625015	-1.0613187	0.170611634	-6.220670144	4.95E-10	8.31E-09
Gm33228	10.77480133	3.020558545	0.485698032	6.21900512	5.00E-10	8.39E-09
Rad51	684.0256495	-2.447501855	0.393604266	-6.21817918	5.03E-10	8.43E-09
Gm14344	38.16855377	2.832420552	0.455582793	6.21713681	5.06E-10	8.48E-09
Gm30421	24.98841609	3.221799258	0.518254878	6.216630841	5.08E-10	8.50E-09
Tdrd6	43.4351443	1.842543834	0.296422775	6.215932072	5.10E-10	8.54E-09
Grm5	310.7598299	4.185301768	0.6733549	6.215595626	5.11E-10	8.55E-09
Gm11549	26.6495985	3.622357285	0.582901403	6.214356783	5.15E-10	8.61E-09
Nelfb	1630.796396	-0.78332216	0.126058278	-6.213968408	5.17E-10	8.63E-09
X1700080G18Rik	27.01344416	3.071812752	0.494622011	6.210424696	5.28E-10	8.82E-09
Rcn3	203.653656	-2.24238636	0.361239622	-6.207476214	5.38E-10	8.98E-09
Vstm4	75.78463196	-1.726880357	0.278212438	-6.207056633	5.40E-10	9.00E-09
A930019D19Rik	15.88927811	2.094428187	0.337643135	6.203082405	5.54E-10	9.21E-09
Saxo2	257.6698504	2.643968436	0.42623036	6.203144322	5.53E-10	9.21E-09
Tecpr1	3173.112786	2.564213611	0.413542413	6.200606111	5.62E-10	9.35E-09
Pygm	746.0058942	2.97276582	0.479453362	6.200323238	5.63E-10	9.36E-09
Elmo3	155.2081644	1.182088242	0.190726176	6.197829097	5.72E-10	9.50E-09
Ccdc64	4784.886655	4.250115784	0.68573174	6.197927758	5.72E-10	9.50E-09
Rras2	265.2545887	-2.128250215	0.343459868	-6.19650332	5.77E-10	9.58E-09
Vopp1	17175.73961	3.08282942	0.497908305	6.191560551	5.96E-10	9.87E-09
Polr1b	733.6835702	-1.302686183	0.210400737	-6.191452559	5.96E-10	9.87E-09
LOC102636700	56.46256797	3.251446583	0.525309047	6.18958802	6.03E-10	9.98E-09
Chad	3.6189638	-3.061685278	0.494707593	-6.18887869	6.06E-10	1.00E-08
Gm42332	33.83282894	6.175872255	0.997942696	6.188604098	6.07E-10	1.00E-08
Creb3	994.7233845	1.366978557	0.220967223	6.186340858	6.16E-10	1.02E-08
Fam120aos	1066.791007	2.697475342	0.436117059	6.185209427	6.20E-10	1.02E-08
Zfp423	646.8929867	-1.70885723	0.276292288	-6.18496175	6.21E-10	1.02E-08
Pcdhb16	554.372723	2.686642808	0.434508267	6.18317996	6.28E-10	1.04E-08
Scaper	1553.952019	0.77164847	0.124805324	6.182816906	6.30E-10	1.04E-08
Suclg2	402.4356326	-2.995291164	0.484485796	-6.182412756	6.31E-10	1.04E-08
Nudt5	872.8667437	-1.200748037	0.194231465	-6.182046958	6.33E-10	1.04E-08
Gm35934	114.7806258	3.041174967	0.492220511	6.17848078	6.47E-10	1.06E-08
Polr1e	313.1114917	-0.956439378	0.15482471	-6.177562872	6.51E-10	1.07E-08
Fam160a1	698.231353	4.361062182	0.705975877	6.177352968	6.52E-10	1.07E-08
Lin7b	26.92740236	2.142732151	0.34687695	6.177211121	6.52E-10	1.07E-08
Hba.a2	125.2162438	-4.535607917	0.734336159	-6.176473622	6.55E-10	1.08E-08
Cpne9	195.6731067	4.038005102	0.653849816	6.175737919	6.59E-10	1.08E-08
Ccdc182	14.02261087	-4.54942132	0.736679061	-6.17558115	6.59E-10	1.08E-08
Gm3696	12.70353987	-2.357586881	0.381855485	-6.174029105	6.66E-10	1.09E-08
Gm20742	8.631373729	5.922932227	0.959330058	6.174029657	6.66E-10	1.09E-08
Cnrip1	1365.59362	2.172787194	0.351920993	6.174076666	6.66E-10	1.09E-08
Epo	5.456374868	-4.07268309	0.65979466	-6.172652397	6.72E-10	1.10E-08
X9330155M09Rik	72.40175802	4.265954939	0.691158252	6.172182605	6.74E-10	1.10E-08
LOC105246973	11.59072471	2.771960607	0.449267528	6.169955396	6.83E-10	1.11E-08
Riiad1	282.0276627	3.521421571	0.570778171	6.169509884	6.85E-10	1.12E-08
BC022687	910.5039806	2.80804229	0.455219994	6.168539013	6.89E-10	1.12E-08
Tom1l1	296.4879887	-2.146884451	0.348328065	-6.163397861	7.12E-10	1.16E-08
Dio3os	128.6105727	-3.736578286	0.606526001	-6.160623416	7.25E-10	1.18E-08
Snora73a	17.48071498	-2.01807683	0.327698712	-6.158330061	7.35E-10	1.20E-08
Lrtm1	1401.931906	6.234343622	1.013175875	6.153268922	7.59E-10	1.23E-08
Camkv	1990.167316	5.03938778	0.819122294	6.152179985	7.64E-10	1.24E-08
Gm29779	431.6806229	-2.647744003	0.430451818	-6.151081013	7.70E-10	1.25E-08
C4bp.ps1	28.38315467	5.392409068	0.877288252	6.146678763	7.91E-10	1.28E-08
Lrrc58	1995.830962	-1.219955924	0.198587393	-6.143169048	8.09E-10	1.31E-08
Pcp4l1	942.2467433	4.545274119	0.740137359	6.141122407	8.19E-10	1.33E-08
Gm1968	2.775612631	-4.79510252	0.7808589	-6.140805359	8.21E-10	1.33E-08
Vmn2r89	24.33258443	7.329937437	1.193701616	6.140510607	8.23E-10	1.33E-08
Slc43a2	801.2095954	1.624381857	0.264621657	6.138506865	8.33E-10	1.35E-08
Dlg4	9523.998208	3.16029779	0.514883087	6.137893967	8.36E-10	1.35E-08
Etf1	3388.19535	-0.896822151	0.146137188	-6.136851034	8.42E-10	1.36E-08
Nynrin	1390.351331	-2.651033581	0.432238484	-6.133265963	8.61E-10	1.39E-08
Snora73b	21.1981376	-2.036963051	0.332124658	-6.133128037	8.62E-10	1.39E-08
Slc14a1	108.2660542	3.746963549	0.611056183	6.131946049	8.68E-10	1.40E-08
Cryba2	92.12388564	-5.414354679	0.883308262	-6.1296321	8.81E-10	1.42E-08
Gm30339	6.010815025	5.406414093	0.882117801	6.12890261	8.85E-10	1.42E-08
Itsn2	1897.446208	1.503647044	0.245414759	6.126962579	8.96E-10	1.44E-08
Pcsk1n	339.0750505	5.271205538	0.860397125	6.126479717	8.98E-10	1.44E-08
Rhod	49.54483992	-2.534027598	0.413639382	-6.126175869	9.00E-10	1.45E-08
Gm33790	13.43531499	4.93498272	0.805730634	6.124854274	9.08E-10	1.46E-08
Gm266	31.16792702	-4.04499455	0.66043461	-6.124746472	9.08E-10	1.46E-08
Gm41011	58.10135556	2.262115374	0.36941423	6.123519851	9.15E-10	1.47E-08
Calr4	15.54150078	4.600400454	0.751422528	6.122255167	9.23E-10	1.48E-08
Vrk2	70.36434398	-2.720813637	0.444463014	-6.121574919	9.27E-10	1.48E-08
Cd9	495.8730425	2.250787908	0.367716464	6.120987584	9.30E-10	1.49E-08
Lcn2	49.06069266	6.602860621	1.078833551	6.12037011	9.34E-10	1.49E-08
X2810471M01Rik	3.541762548	-3.679916574	0.60132181	-6.119712457	9.37E-10	1.50E-08
Xpot	1873.507309	-1.263857152	0.206554871	-6.118747736	9.43E-10	1.51E-08
Gm2102	21.94886542	5.052528472	0.825811703	6.118257292	9.46E-10	1.51E-08
Rnase4	53.39599556	-1.793450551	0.293304773	-6.114631319	9.68E-10	1.54E-08
Sct	24.16901358	3.723933259	0.609121458	6.113613646	9.74E-10	1.55E-08
Phgdh	343.0850069	-3.091705463	0.50573722	-6.113264643	9.76E-10	1.55E-08
Nxph2	44.33142119	7.219726498	1.181083436	6.11279972	9.79E-10	1.56E-08
Cabp1	558.5008266	2.304315681	0.376970863	6.112715614	9.79E-10	1.56E-08
X2.Mar.1	1011.732915	1.51621779	0.248036032	6.112893273	9.78E-10	1.56E-08
Gbx2	14.21126757	5.26358163	0.86126563	6.111449761	9.87E-10	1.57E-08
Cemip	154.7102914	3.892879774	0.637142603	6.109903426	9.97E-10	1.58E-08
Mir7652	21.74943738	-1.997937125	0.327064028	-6.108703351	1.00E-09	1.59E-08
Prom1	28067.46171	3.463371424	0.567102524	6.10713456	1.01E-09	1.61E-08
Boc	113.4643008	-2.261810169	0.370370877	-6.106879112	1.02E-09	1.61E-08
Ranbp1	1882.468332	-1.53367724	0.251139482	-6.106874279	1.02E-09	1.61E-08
Gzmm	202.9445767	3.061031769	0.501626339	6.102214993	1.05E-09	1.66E-08
Gm40578	12.63052128	-2.708204418	0.444017251	-6.099322514	1.07E-09	1.68E-08
Gm36603	1.6817174	-3.841351664	0.630005185	-6.097333408	1.08E-09	1.70E-08
Dsg2	11.13808258	-3.419917714	0.561026674	-6.095820166	1.09E-09	1.72E-08
Tsc22d1	5442.744829	-0.844349986	0.13851992	-6.095513097	1.09E-09	1.72E-08
Gm30104	4.24116608	-4.825601488	0.791924416	-6.093512702	1.10E-09	1.74E-08
Pcdhb8	100.1649052	1.857572079	0.304971212	6.090975159	1.12E-09	1.77E-08
Atrn	3530.158477	1.079262993	0.17722304	6.089857133	1.13E-09	1.78E-08
Cfap53	22.9412675	2.141048236	0.351625895	6.088994779	1.14E-09	1.79E-08
Kcne1	16.84271299	-3.06222565	0.502968689	-6.088302749	1.14E-09	1.80E-08
Xpo1	7849.957835	-1.056377777	0.173573298	-6.086061564	1.16E-09	1.82E-08
Csrp3	18.33609409	4.528611822	0.744250305	6.084796731	1.17E-09	1.83E-08
Proser3	267.022136	-1.062239116	0.174581995	-6.084471175	1.17E-09	1.84E-08
Dgcr2	2435.196179	-0.894399203	0.147019446	-6.083543574	1.18E-09	1.85E-08
Cnbd2	217.0911228	2.598821464	0.42728128	6.082226359	1.19E-09	1.86E-08
Calhm2	12.96753176	-1.481568811	0.243609708	-6.081731392	1.19E-09	1.86E-08
Gm15348	20.5185475	5.09970793	0.838664849	6.080746003	1.20E-09	1.87E-08
Sppl2b	1052.323391	1.633143495	0.268597122	6.080271763	1.20E-09	1.88E-08
Rhoq	1225.234955	-1.930554471	0.317588856	-6.078785297	1.21E-09	1.89E-08
Wdr31	1762.10126	3.231113837	0.531544965	6.078721559	1.21E-09	1.89E-08
Scn1b	135.2618071	4.962144665	0.81634027	6.078524908	1.21E-09	1.90E-08
Gm36368	8.23235207	-2.262656753	0.37229519	-6.077587923	1.22E-09	1.91E-08
Tcaim	616.3971446	2.223231992	0.365914598	6.075822071	1.23E-09	1.93E-08
Pou6f1	1618.605703	2.440287318	0.401814931	6.073162376	1.25E-09	1.96E-08
Drd2	211.1659064	3.845340228	0.633278555	6.072115026	1.26E-09	1.97E-08
Gm29993	2.880893564	-3.755365431	0.618516381	-6.071569885	1.27E-09	1.97E-08
Hbb.y	3683.155617	-12.45670228	2.051652557	-6.071545709	1.27E-09	1.97E-08
Emx2	6.523613747	-5.412532553	0.891645882	-6.070271465	1.28E-09	1.99E-08
Ocel1	46.62084881	1.73943083	0.286551081	6.070229511	1.28E-09	1.99E-08
Csrp2bp	907.3562155	-0.733509372	0.120892943	-6.067429182	1.30E-09	2.02E-08
Ccdc40	203.2045483	-2.692490461	0.443833622	-6.066440949	1.31E-09	2.03E-08
Spata4	21.53811737	4.644605293	0.765643036	6.066280337	1.31E-09	2.03E-08
Gm6485	366.635198	2.868078407	0.472915783	6.064670518	1.32E-09	2.05E-08
Gm35502	30.63530931	2.830454398	0.466752353	6.064145961	1.33E-09	2.06E-08
Snord47	32.67314502	-1.884409333	0.310812893	-6.062841588	1.34E-09	2.07E-08
Capn6	59.22264295	-3.316072644	0.547024742	-6.062015823	1.34E-09	2.08E-08
Sh3pxd2b	1578.787904	-1.599953883	0.263983388	-6.060812751	1.35E-09	2.10E-08
X1700037H04Rik	365.5041713	-1.993298414	0.329271219	-6.053667317	1.42E-09	2.19E-08
Sdr42e1	75.37378136	1.439871347	0.237869599	6.053196168	1.42E-09	2.19E-08
Myh10	5936.58373	-1.457129262	0.240761676	-6.052164476	1.43E-09	2.21E-08
Vasn	457.888832	1.753103822	0.289679268	6.051878795	1.43E-09	2.21E-08
Enpp4	474.0835015	1.904240506	0.314698985	6.050990301	1.44E-09	2.22E-08
Snord12	28.59170688	-2.186186679	0.361344946	-6.050137692	1.45E-09	2.23E-08
Kif27	92.20741933	-0.825386738	0.136441151	-6.049397347	1.45E-09	2.24E-08
Spag16	62.17181542	-3.448331134	0.570170963	-6.047889774	1.47E-09	2.26E-08
Nup54	673.1039869	-0.942279503	0.155862205	-6.045593309	1.49E-09	2.29E-08
Tle6	103.9062589	2.371931275	0.392360549	6.045284827	1.49E-09	2.29E-08
Svip	1273.685518	1.735317124	0.287070058	6.044925538	1.49E-09	2.30E-08
Lamc3	67.58165974	3.3083563	0.547489142	6.042779749	1.51E-09	2.33E-08
Foxj1	144.7610279	2.260520716	0.374193453	6.041048285	1.53E-09	2.35E-08
Gm38914	49.28426078	2.972549417	0.492361795	6.037327519	1.57E-09	2.40E-08
X5730405O15Rik	36.72860761	1.607675768	0.266345233	6.036059844	1.58E-09	2.42E-08
C030004G16Rik	31.96418253	4.189308705	0.694221386	6.034542855	1.59E-09	2.44E-08
Gm2233	16.20155952	6.463767374	1.071193214	6.034175057	1.60E-09	2.45E-08
Amt	934.6002335	-1.462713103	0.242485482	-6.032167734	1.62E-09	2.48E-08
Zfp853	96.51277462	2.787482155	0.462308325	6.029487263	1.64E-09	2.52E-08
Shisa8	34.76254023	2.44076528	0.404882311	6.02833272	1.66E-09	2.53E-08
Gngt2	2377.614006	4.242090463	0.703828866	6.027161809	1.67E-09	2.55E-08
Olfm4	110.389634	3.632948127	0.602836587	6.026422762	1.68E-09	2.56E-08
Gm33467	17.71393085	-1.927429056	0.319942496	-6.024298364	1.70E-09	2.59E-08
Fkbp10	132.8793578	-2.009346672	0.333581398	-6.023557313	1.71E-09	2.60E-08
Bbs1	3614.754557	2.324795891	0.385990557	6.02293462	1.71E-09	2.61E-08
Foxj2	1342.673158	2.211439356	0.367231996	6.021913607	1.72E-09	2.62E-08
Gm9776	104.7149545	1.543052791	0.256270697	6.021183095	1.73E-09	2.63E-08
Sv2a	3721.078969	3.096744677	0.514309903	6.021164787	1.73E-09	2.63E-08
Mtmr1	2283.753071	1.767288108	0.293527425	6.02086196	1.73E-09	2.64E-08
Atad5	1251.246015	-1.435981569	0.238520882	-6.02035997	1.74E-09	2.64E-08
Alg1	347.3624446	1.153215463	0.191581175	6.019461286	1.75E-09	2.66E-08
Wdr63	133.5006827	4.349678649	0.722838775	6.017494912	1.77E-09	2.69E-08
X4932438A13Rik	7101.700504	1.430412768	0.237818696	6.014719587	1.80E-09	2.73E-08
Gm13446	26.40143363	6.162381377	1.025025505	6.011929799	1.83E-09	2.78E-08
Ppat	816.1902415	-2.215312327	0.368558208	-6.01075293	1.85E-09	2.80E-08
Meis1	2447.365994	-1.139006851	0.189502926	-6.01049743	1.85E-09	2.80E-08
Gm33729	26.37344747	2.015384418	0.335326105	6.010222246	1.85E-09	2.80E-08
H2.Q5	4.167136829	-2.600599602	0.43271553	-6.009952086	1.86E-09	2.81E-08
Evc2	237.0923332	-2.378516171	0.396278848	-6.002127502	1.95E-09	2.94E-08
Gm21814	10.19531694	-1.944927891	0.324078685	-6.001406396	1.96E-09	2.95E-08
Edn3	10.97358812	-3.797218305	0.632823882	-6.000434581	1.97E-09	2.97E-08
A930031H19Rik	68.38114939	8.89697788	1.482737639	6.000372313	1.97E-09	2.97E-08
Mlxipl	18.91466148	-2.098351727	0.349910234	-5.996828678	2.01E-09	3.03E-08
Rab11fip5	515.4009114	2.13882491	0.356725635	5.995714076	2.03E-09	3.05E-08
Hist2h2aa1	22.87501863	6.951691754	1.159585633	5.994979203	2.04E-09	3.06E-08
Slc43a3	109.8503024	-2.889498861	0.482035981	-5.994363434	2.04E-09	3.07E-08
Gm39299	16.86782888	2.913395554	0.486106607	5.993326388	2.06E-09	3.09E-08
Capn7	3801.101227	1.339647407	0.22355199	5.992554168	2.07E-09	3.10E-08
Pde11a	69.32913085	3.995430449	0.666743499	5.992455056	2.07E-09	3.10E-08
Csrnp1	38.85980793	-1.627650854	0.271623068	-5.992314516	2.07E-09	3.10E-08
Tom1l2	2917.980066	1.668262852	0.278480449	5.990592357	2.09E-09	3.14E-08
C330016L05Rik	51.37353128	5.848513127	0.976348438	5.990190491	2.10E-09	3.14E-08
Gm36584	62.75332555	2.541202346	0.42424069	5.990001447	2.10E-09	3.14E-08
Gng12	576.8407869	-1.438037591	0.240079106	-5.989848995	2.10E-09	3.14E-08
Senp8	388.1923617	-1.216613632	0.20311981	-5.98963553	2.10E-09	3.15E-08
Gm35002	48.4449452	3.930435597	0.656384088	5.988011694	2.12E-09	3.18E-08
Itga6	923.813589	-2.3762935	0.396963759	-5.986172403	2.15E-09	3.21E-08
Fastkd3	301.6348857	-1.125045456	0.187967707	-5.985312462	2.16E-09	3.23E-08
Cad	1750.795317	-1.815801387	0.303395114	-5.984939452	2.16E-09	3.23E-08
Stt3a	2205.790858	-1.173183191	0.196042066	-5.984344149	2.17E-09	3.24E-08
Snx21	461.6096087	1.614418952	0.269854359	5.982556499	2.20E-09	3.27E-08
X1600027J07Rik	6.427958847	-3.816773164	0.638030717	-5.982115061	2.20E-09	3.28E-08
Slc39a11	205.3864906	-0.806298118	0.13478324	-5.982183817	2.20E-09	3.28E-08
Gm38927	21.43731208	3.501406528	0.585452365	5.980685596	2.22E-09	3.31E-08
Arhgef3	191.2860733	2.149567264	0.359687116	5.976214239	2.28E-09	3.40E-08
Paqr4	1682.201607	3.145353517	0.526461061	5.974522623	2.31E-09	3.43E-08
Arl11	27.63065596	2.365899399	0.396034099	5.973979016	2.32E-09	3.44E-08
Cstf1	892.7699812	-0.856410801	0.143360118	-5.973842766	2.32E-09	3.44E-08
X4930563E18Rik	10.14989603	3.741029086	0.626383107	5.972429726	2.34E-09	3.47E-08
Ptprb	394.2623287	3.086281964	0.516747586	5.972513556	2.34E-09	3.47E-08
Casq1	58.34975626	1.495369551	0.250482682	5.969951856	2.37E-09	3.52E-08
Zfand2a	809.5279999	0.795862673	0.133327084	5.96924984	2.38E-09	3.53E-08
C230057M02Rik	25.52686807	7.792287237	1.305770405	5.967578381	2.41E-09	3.56E-08
Igip	425.5446959	2.687169644	0.450303679	5.967461007	2.41E-09	3.56E-08
H1foo	14.34079099	4.910710958	0.822944706	5.967242901	2.41E-09	3.57E-08
Rnf219	565.3427924	-2.023343483	0.339071566	-5.967305085	2.41E-09	3.57E-08
Gm26578	17.5085267	-3.090194649	0.518142674	-5.963984067	2.46E-09	3.64E-08
Ccnd3	643.9763317	-2.176840183	0.365031289	-5.963434498	2.47E-09	3.65E-08
Tmem150c	1343.221661	2.989520301	0.501359986	5.96282189	2.48E-09	3.66E-08
Zmynd15	40.03906419	0.947048911	0.158843215	5.962161575	2.49E-09	3.67E-08
Arl4d	873.1778585	4.816708577	0.808030234	5.96104994	2.51E-09	3.69E-08
Atp1a2	324.4839464	2.947614436	0.494717932	5.958171806	2.55E-09	3.76E-08
Rapgef5	3734.005934	3.136830534	0.526629377	5.956429077	2.58E-09	3.79E-08
Heatr1	1433.806795	-1.632388601	0.274094462	-5.955569442	2.59E-09	3.81E-08
Trp53rka	283.0628736	-0.937492479	0.157467666	-5.953555427	2.62E-09	3.86E-08
Pml	322.3489827	-1.570086921	0.263763579	-5.95262973	2.64E-09	3.88E-08
Gm35677	40.2409839	2.988086622	0.502000006	5.952363718	2.64E-09	3.88E-08
Flnb	1244.505806	-1.623065484	0.272741656	-5.950926271	2.67E-09	3.91E-08
Cklf	89.78311811	-1.928901058	0.324226242	-5.949244095	2.69E-09	3.95E-08
Pbx2	1488.944367	-1.766263398	0.296933739	-5.948341888	2.71E-09	3.97E-08
Rtkn	207.8066959	-2.088000164	0.351061479	-5.947676664	2.72E-09	3.98E-08
BC030499	452.7514441	4.634046293	0.779125819	5.9477509	2.72E-09	3.98E-08
Gm13031	12.4098608	4.730804351	0.795625229	5.946021042	2.75E-09	4.02E-08
Gm32838	12.69916898	6.470567001	1.088493001	5.944518701	2.77E-09	4.05E-08
LOC102639568	364.4388293	3.057212298	0.514505445	5.942040701	2.81E-09	4.11E-08
Gm15708	30.63840625	-1.057654796	0.178065283	-5.93970244	2.86E-09	4.17E-08
Zfp930	419.9472053	-1.082651578	0.182318135	-5.938255013	2.88E-09	4.20E-08
Mnd1	39.16047295	-3.278124766	0.552201392	-5.936465959	2.91E-09	4.25E-08
Gm36416	40.74711573	3.970018236	0.66896118	5.934601818	2.95E-09	4.29E-08
Fyco1	5760.944631	2.476859124	0.417377442	5.934338746	2.95E-09	4.30E-08
Papolb	33.97277816	2.470941695	0.41642357	5.933721992	2.96E-09	4.31E-08
X4930405J17Rik	33.98036134	3.014720841	0.508087598	5.933466698	2.97E-09	4.32E-08
BC055324	501.8227239	-2.446402102	0.412441661	-5.93151064	3.00E-09	4.37E-08
F10	5.507445904	-2.769233493	0.466886325	-5.931279935	3.01E-09	4.37E-08
LOC108168243	36.8356732	1.635284363	0.275786841	5.929522812	3.04E-09	4.41E-08
Hey2	284.998399	2.082681703	0.351245448	5.929419766	3.04E-09	4.41E-08
Gpr88	34.97655811	4.161144404	0.702021752	5.927372468	3.08E-09	4.47E-08
Ankrd12	4232.323973	2.398145372	0.404609295	5.927064465	3.08E-09	4.47E-08
Gm20658	30.03025653	3.166482197	0.534336673	5.92600575	3.10E-09	4.50E-08
Gm41283	8.460410316	-3.173122765	0.535682299	-5.923516179	3.15E-09	4.56E-08
Nr2f2	698.7352691	-1.386908636	0.234134435	-5.92355685	3.15E-09	4.56E-08
Fam98c	166.543133	2.025352199	0.341981612	5.922400877	3.17E-09	4.59E-08
Pus1	201.9420363	-1.511703058	0.255356577	-5.919969146	3.22E-09	4.66E-08
LOC105246034	30.17740751	2.312483187	0.39090771	5.915675566	3.31E-09	4.78E-08
Snap25	21989.58198	4.011159563	0.678065875	5.915589779	3.31E-09	4.78E-08
Sgpp2	192.8719592	2.63252828	0.445049776	5.915132251	3.32E-09	4.79E-08
Rab10os	378.7202019	2.120914227	0.35899494	5.907922347	3.46E-09	5.00E-08
Dlgap1	569.3560182	3.338944467	0.565178486	5.907769931	3.47E-09	5.00E-08
Hsp90ab1	29627.60387	-1.939217036	0.328254878	-5.907656407	3.47E-09	5.00E-08
Sptssb	30.60971159	4.126478327	0.698579303	5.906957603	3.48E-09	5.02E-08
Zdhhc15	354.2924619	-2.388253017	0.404402902	-5.905627798	3.51E-09	5.06E-08
Galnt2	1302.049176	-0.88679308	0.150175404	-5.905048758	3.53E-09	5.07E-08
Bcat2	232.4216139	-1.444784106	0.244782084	-5.902327817	3.58E-09	5.15E-08
Ddx11	430.4596048	-2.071111288	0.350921039	-5.901929659	3.59E-09	5.16E-08
Igfbp5	1819.223234	-2.640368056	0.44759765	-5.898976584	3.66E-09	5.25E-08
Gm35922	12.46310896	5.389152671	0.913737535	5.89792196	3.68E-09	5.28E-08
Lpin1	1177.773761	2.203639199	0.373796424	5.895292349	3.74E-09	5.36E-08
Trim27	758.722561	-1.827716087	0.310158615	-5.892843197	3.80E-09	5.44E-08
Cfap69	1276.112385	1.930902643	0.327762659	5.89116115	3.83E-09	5.49E-08
Abhd14b	859.956222	2.316151166	0.393270867	5.889455228	3.87E-09	5.54E-08
Nsf	7080.476757	2.682582432	0.455484063	5.889519849	3.87E-09	5.54E-08
Inhbb	509.616024	4.356942657	0.739801303	5.889341691	3.88E-09	5.55E-08
Alx3	20.82479874	-7.568448185	1.285149037	-5.889159909	3.88E-09	5.55E-08
Trip6	337.0793916	-1.920353381	0.326097686	-5.888889932	3.89E-09	5.55E-08
Lta4h	1261.135551	-0.923481785	0.156826384	-5.888561347	3.90E-09	5.56E-08
Slc6a5	228.4485603	3.815908509	0.648098908	5.887849003	3.91E-09	5.58E-08
Grwd1	367.4096327	-1.7593149	0.298829466	-5.887354163	3.92E-09	5.60E-08
Kcnj10	525.1393993	3.433139682	0.583337481	5.885340464	3.97E-09	5.66E-08
Gm41165	2.214848961	-2.915111259	0.495401813	-5.884337077	4.00E-09	5.69E-08
Nrsn1	633.5828758	3.339675259	0.56759824	5.883871761	4.01E-09	5.71E-08
Mtrr	378.2650624	-0.95333946	0.16202921	-5.883750605	4.01E-09	5.71E-08
Fbl	672.4642651	-2.095984562	0.356286301	-5.882865985	4.03E-09	5.73E-08
Gm42197	10.71875336	-3.614971659	0.614770557	-5.880196466	4.10E-09	5.82E-08
Stom	1486.878253	3.002937881	0.510683193	5.880236356	4.10E-09	5.82E-08
Tmem229b	4649.45631	4.10422419	0.698041955	5.879623944	4.11E-09	5.84E-08
Chgb	6957.711573	3.840641546	0.653218124	5.879569786	4.11E-09	5.84E-08
Nt5c1a	35.45786881	5.073990551	0.863002679	5.879460951	4.12E-09	5.84E-08
Ntm	3574.751013	3.08548382	0.525118001	5.875791376	4.21E-09	5.96E-08
Alox8	9.65733207	5.844957159	0.995135585	5.873528438	4.27E-09	6.04E-08
Cdsn	5.825712336	4.691369132	0.799171364	5.870291831	4.35E-09	6.16E-08
X1700088E04Rik	34.43396453	2.678717928	0.456380225	5.869487279	4.37E-09	6.18E-08
Aqp4	560.0861463	5.289785605	0.901276291	5.86921642	4.38E-09	6.19E-08
Cbx4	766.9602181	2.407122744	0.410197071	5.868210468	4.41E-09	6.22E-08
Nipal3	1571.104939	2.125297255	0.362176146	5.868131503	4.41E-09	6.22E-08
Fn1	2971.580424	-2.026340541	0.345346398	-5.867559511	4.42E-09	6.24E-08
Gm31728	21.08794899	1.170132321	0.199458578	5.866542994	4.45E-09	6.28E-08
A930002C04Rik	25.29713353	4.607829934	0.78574864	5.864254418	4.51E-09	6.36E-08
Cdh1	71.59542629	-3.645245773	0.621640537	-5.863912593	4.52E-09	6.37E-08
Gm30618	11.73387878	3.920433034	0.668724221	5.862555758	4.56E-09	6.42E-08
Tgm7	41.60678721	6.774820641	1.155637024	5.862412244	4.56E-09	6.42E-08
Lnx1	138.0376549	3.02972386	0.517019871	5.859975665	4.63E-09	6.51E-08
Hspd1	3976.282416	-1.829497786	0.312234633	-5.859368542	4.65E-09	6.53E-08
Zdhhc23	143.6600893	1.970464539	0.336316292	5.858962488	4.66E-09	6.54E-08
Dpcr1	3.476207185	-2.432520131	0.415305048	-5.857188928	4.71E-09	6.61E-08
Spred2	627.7609853	-1.990649421	0.339904802	-5.856491025	4.73E-09	6.64E-08
Slc32a1	453.9792052	3.661856831	0.625349627	5.855695232	4.75E-09	6.66E-08
Syt10	133.0115674	3.069387357	0.524499549	5.852030492	4.86E-09	6.81E-08
Tmcc3	642.9423726	2.437272832	0.416553428	5.851044949	4.88E-09	6.84E-08
H2.Q4	59.65822992	-1.509189486	0.257951884	-5.850662769	4.90E-09	6.86E-08
Gm35438	50.8102201	3.837715999	0.655980086	5.850354429	4.91E-09	6.87E-08
Cep290	5483.234002	2.795455693	0.477880996	5.849690023	4.92E-09	6.89E-08
Ppil6	127.1895233	1.617534843	0.276536551	5.849262368	4.94E-09	6.90E-08
Synpo	99.36673292	-2.111596239	0.361028997	-5.848827254	4.95E-09	6.92E-08
Zfp641	649.5192729	2.173012291	0.371595656	5.847787113	4.98E-09	6.96E-08
Heg1	2603.661776	1.884113719	0.322317112	5.845528054	5.05E-09	7.05E-08
Stk26	35.37921368	-3.564384071	0.609832193	-5.844860457	5.07E-09	7.07E-08
Gpr108	1073.285514	1.501833399	0.256978967	5.844188023	5.09E-09	7.10E-08
X1700109G14Rik	13.08953417	3.64795398	0.624218827	5.844030685	5.10E-09	7.10E-08
Strc	11.73195402	4.46661387	0.764308372	5.843994433	5.10E-09	7.10E-08
X3110039M20Rik	2.218428229	-3.657126961	0.625948872	-5.842533028	5.14E-09	7.16E-08
Gm32589	2.563833893	-4.794536169	0.820735401	-5.841756261	5.17E-09	7.19E-08
Slc25a24	379.602827	-3.128563707	0.535696598	-5.840178416	5.21E-09	7.25E-08
Pgbd1	161.7379907	-1.199723584	0.205430203	-5.840054509	5.22E-09	7.25E-08
LOC108167813	5.082818707	-6.134664367	1.050654349	-5.838898754	5.25E-09	7.30E-08
Slc31a2	1112.840768	2.880567429	0.493399254	5.838207911	5.28E-09	7.32E-08
Cmtm3	189.7813441	-2.514200813	0.430694467	-5.837550762	5.30E-09	7.35E-08
Stip1	3474.379551	-1.10099866	0.188607932	-5.837499238	5.30E-09	7.35E-08
Fam212b	1413.160663	3.285703921	0.562932961	5.836758817	5.32E-09	7.38E-08
Saxo1os	8.474427402	6.250154047	1.071193322	5.834758225	5.39E-09	7.46E-08
Pkdcc	298.8675122	-2.551437246	0.4373122	-5.834361008	5.40E-09	7.47E-08
Gm4349	10.65454226	-1.544727294	0.264882851	-5.831737648	5.49E-09	7.59E-08
Tdp1	675.5801451	-1.175880726	0.201698514	-5.829892862	5.55E-09	7.67E-08
Cdk2ap2	2171.226095	3.163257096	0.542652951	5.829245173	5.57E-09	7.69E-08
Zfp3	251.048828	0.776605308	0.133248667	5.828240711	5.60E-09	7.74E-08
Pon1	17.8429686	4.453029694	0.764069402	5.828043475	5.61E-09	7.74E-08
Rpe65	50.68428019	7.090750473	1.216919426	5.826803583	5.65E-09	7.79E-08
Gm41836	9.613543729	5.380596076	0.92345787	5.826574498	5.66E-09	7.80E-08
Tnnt1	95.13481524	3.328011085	0.571240042	5.825941531	5.68E-09	7.83E-08
Gpsm3	371.5794987	3.343305815	0.574020684	5.824364711	5.73E-09	7.90E-08
Zfyve28	1347.851859	4.283845381	0.735761533	5.82232855	5.80E-09	7.99E-08
Gck	169.2920983	-2.103705364	0.361527555	-5.818935054	5.92E-09	8.15E-08
Gabrg1	95.8029054	4.067639749	0.699068799	5.818654407	5.93E-09	8.16E-08
Lgmn	4933.301161	2.943463601	0.506000527	5.817115677	5.99E-09	8.23E-08
Gm38427	12.92928771	2.799626093	0.481341314	5.816301259	6.02E-09	8.26E-08
Esr1	28.75831297	4.216040969	0.725015473	5.81510482	6.06E-09	8.32E-08
Fmnl1	131.5983451	1.849645492	0.318126353	5.814185065	6.09E-09	8.36E-08
Gm39059	11.5743282	1.762201717	0.303195464	5.812097887	6.17E-09	8.46E-08
Pldi	5.493145007	-5.769113519	0.99271652	-5.811441035	6.19E-09	8.48E-08
Pcdhb10	113.4544009	2.572648842	0.442687503	5.811433178	6.19E-09	8.48E-08
Pdyn	100.0749966	4.28994836	0.73824964	5.810972508	6.21E-09	8.50E-08
Mir124a.1hg	21902.17641	3.559122339	0.612561067	5.810232695	6.24E-09	8.54E-08
X2500002B13Rik	42.39942967	-1.759845968	0.302915283	-5.809696848	6.26E-09	8.56E-08
Atic	1149.561337	-2.440950842	0.420256304	-5.808243255	6.31E-09	8.63E-08
Itpripl2	108.935691	-1.719768415	0.296107506	-5.807919008	6.33E-09	8.64E-08
LOC102640059	6.465036911	-1.636762099	0.28193249	-5.805510733	6.42E-09	8.76E-08
Tfdp1	2233.913763	-0.850119269	0.1464644	-5.804272359	6.46E-09	8.82E-08
Icam5	10.8718034	4.636889705	0.799449845	5.800100822	6.63E-09	9.03E-08
Rgs20	466.230697	4.467460713	0.770241844	5.80007532	6.63E-09	9.03E-08
Pcdhb6	84.43061223	2.045916659	0.352811087	5.798901265	6.68E-09	9.09E-08
Gm26512	43.72339965	7.863602876	1.356463617	5.797135121	6.75E-09	9.17E-08
Nfia	729.1366953	2.15419323	0.371596552	5.797129217	6.75E-09	9.17E-08
Ago4	1409.329249	1.4651792	0.252737096	5.797246332	6.74E-09	9.17E-08
Esm1	9.462056993	-4.243795599	0.732073425	-5.796953494	6.75E-09	9.18E-08
X4930515B02Rik	9.596056652	6.235871918	1.076002398	5.795407081	6.82E-09	9.25E-08
X6720489N17Rik	152.6311374	-2.313487154	0.399194501	-5.795388341	6.82E-09	9.25E-08
Seh1l	2211.848168	-1.149385703	0.198327358	-5.795396649	6.82E-09	9.25E-08
Cpxm2	50.45402053	3.412422333	0.588844905	5.795112264	6.83E-09	9.26E-08
LOC108168237	12.80908676	-2.618306013	0.451887211	-5.794158256	6.87E-09	9.30E-08
Zc3hav1l	1119.92981	-2.781864655	0.480114758	-5.794166098	6.87E-09	9.30E-08
Aqp3	3.630866709	-5.084817168	0.87780241	-5.792667129	6.93E-09	9.38E-08
Ccdc187	2134.323928	3.565813971	0.615660969	5.791846732	6.96E-09	9.42E-08
Nrgn	35.56364208	2.962902467	0.511632793	5.791072246	6.99E-09	9.46E-08
Poteg	9.924468754	4.264691252	0.736784664	5.788246502	7.11E-09	9.61E-08
Plekhg2	601.341752	-2.651249495	0.458037739	-5.788277408	7.11E-09	9.61E-08
Pkd1l3	64.86272822	1.412521569	0.244043137	5.787999567	7.12E-09	9.62E-08
Nrip3	208.5288569	3.43819435	0.594144716	5.786796144	7.17E-09	9.68E-08
Dpy19l2	4.448920261	-3.088909737	0.533901068	-5.785547028	7.23E-09	9.75E-08
Cldn34b4	2.711134513	18.45627333	3.190355131	5.785021595	7.25E-09	9.77E-08
Gm29683	14.72408627	-2.207092454	0.381610097	-5.783632222	7.31E-09	9.85E-08
Wfs1	783.665602	1.824749086	0.315512743	5.783440217	7.32E-09	9.86E-08
Lpar2	169.8073356	-2.8694937	0.496238982	-5.782483445	7.36E-09	9.91E-08
St6galnac3	143.4887701	-1.942634322	0.335969313	-5.782177854	7.37E-09	9.92E-08
Abi3	116.5578751	2.328452453	0.4028254	5.780301967	7.46E-09	1.00E-07
Palld	495.4692375	-1.710492928	0.295955613	-5.779559001	7.49E-09	1.01E-07
Xkr6	111.0930223	2.786614959	0.482317836	5.777549063	7.58E-09	1.02E-07
Leng9	90.09955129	2.111309563	0.36565328	5.774075279	7.74E-09	1.04E-07
Kcnt1	207.4563163	3.781192217	0.654948789	5.77326393	7.78E-09	1.04E-07
Gm34128	15.4423161	4.490754001	0.777996131	5.772206083	7.82E-09	1.05E-07
AI197445	119.1526627	3.4373924	0.595581446	5.771490072	7.86E-09	1.05E-07
Ttc30b	573.3986687	2.446478351	0.423932476	5.770915155	7.88E-09	1.06E-07
Kif19a	2220.249728	4.113955181	0.713184619	5.768429484	8.00E-09	1.07E-07
Mtmr4	3006.121666	-0.559164454	0.09693564	-5.768409351	8.00E-09	1.07E-07
Flrt3	634.5438476	-2.708304924	0.469537974	-5.768021057	8.02E-09	1.07E-07
Ifi30	127.9139078	-1.68341592	0.292004121	-5.765041645	8.16E-09	1.09E-07
C130023O10Rik	55.12361773	2.100608648	0.364385862	5.764791852	8.18E-09	1.09E-07
Gm5563	22.53784103	-1.930774313	0.334957153	-5.764242667	8.20E-09	1.10E-07
Mmel1	86.37219376	3.526459009	0.611824211	5.763843514	8.22E-09	1.10E-07
Sh3gl2	3299.929432	3.647998502	0.633013889	5.762904364	8.27E-09	1.10E-07
Gm40496	77.2837236	1.047989295	0.181914404	5.760892318	8.37E-09	1.12E-07
F2r	870.901393	-2.315973743	0.40211056	-5.759544694	8.43E-09	1.12E-07
Amph	3360.639611	2.301194932	0.399555041	5.759394061	8.44E-09	1.12E-07
X4930511A08Rik	3.099818872	-3.654088148	0.634654242	-5.757604549	8.53E-09	1.13E-07
A930017K11Rik	87.22988919	3.253152338	0.565019801	5.757589969	8.53E-09	1.13E-07
Cdv3	1718.57794	-1.926991302	0.334684013	-5.757643707	8.53E-09	1.13E-07
Qrfpr	61.63512553	3.441944321	0.597885024	5.756866597	8.57E-09	1.14E-07
Gm39358	17.43950373	2.775916799	0.482219271	5.756544722	8.59E-09	1.14E-07
Nudt16l1	562.8689337	-0.57707409	0.100255696	-5.756022949	8.61E-09	1.14E-07
Nudt18	326.1624008	1.768965959	0.307388833	5.754815294	8.67E-09	1.15E-07
Gmds	106.7131491	-1.315895532	0.228787394	-5.751608547	8.84E-09	1.17E-07
Slc26a7	64.73400846	2.857590129	0.4969701	5.750024253	8.92E-09	1.18E-07
Taok3	1684.591228	3.103519515	0.539887774	5.748453042	9.01E-09	1.19E-07
Enpp5	2176.238967	2.811543544	0.489108417	5.748303336	9.01E-09	1.19E-07
Gm34305	27.02185764	1.596849562	0.277823163	5.747719317	9.05E-09	1.20E-07
Slco1c1	65.17442381	4.989016893	0.868315736	5.745625334	9.16E-09	1.21E-07
Nip7	786.0315498	-1.049318635	0.182642024	-5.745220129	9.18E-09	1.21E-07
Glra1	43.39877887	7.206798489	1.254512928	5.744698464	9.21E-09	1.22E-07
Gm28800	32.77147047	-2.284125302	0.397729469	-5.7429119	9.31E-09	1.23E-07
Bhlhe41	795.4836548	3.17117912	0.552224675	5.742552375	9.33E-09	1.23E-07
Gm41223	3.187137277	-2.386039686	0.415633386	-5.740731528	9.43E-09	1.24E-07
Bcl2l10	7.889094826	5.42670116	0.945291182	5.740772009	9.42E-09	1.24E-07
X1110034G24Rik	476.1277606	1.030578076	0.179527103	5.740515264	9.44E-09	1.24E-07
Rnf168	1110.478246	-0.814269385	0.141852578	-5.740250856	9.45E-09	1.24E-07
Rgs11	477.8788116	3.389659708	0.590600052	5.739348811	9.50E-09	1.25E-07
Elovl4	10950.69245	3.358852813	0.585289161	5.738792099	9.54E-09	1.25E-07
Trhr	19.16634855	7.061680564	1.230909318	5.736962474	9.64E-09	1.27E-07
Gm26705	13.77668945	3.953232058	0.68922146	5.735793629	9.71E-09	1.28E-07
Gm996	139.2930675	3.213139877	0.560353694	5.734128128	9.80E-09	1.29E-07
Inpp5k	1638.580533	1.724584438	0.300829551	5.732762721	9.88E-09	1.30E-07
Pabpn1l	10.54965148	6.503441776	1.135318442	5.728297485	1.01E-08	1.33E-07
Cdkl5	327.6531558	1.948650382	0.34019197	5.72809047	1.02E-08	1.33E-07
Chaf1a	911.6827876	-2.466178318	0.43055477	-5.727908485	1.02E-08	1.33E-07
LOC108167542	2.466806343	-3.48289642	0.608158233	-5.72695761	1.02E-08	1.34E-07
Polq	568.7336486	-1.651437761	0.288359145	-5.727017132	1.02E-08	1.34E-07
Ccne2	200.565079	-1.642852378	0.286972222	-5.724778399	1.04E-08	1.36E-07
Pitrm1	1577.407525	-1.495040047	0.261156377	-5.724692853	1.04E-08	1.36E-07
X9530052C20Rik	16.96599581	-2.026313176	0.35402351	-5.723668401	1.04E-08	1.36E-07
Nabp1	193.4026394	-1.326282561	0.231822658	-5.721108411	1.06E-08	1.38E-07
X4930513N10Rik	28.17227299	-1.006662775	0.176010062	-5.719347882	1.07E-08	1.40E-07
Peg10	627.5058826	-2.15991964	0.377660306	-5.719212761	1.07E-08	1.40E-07
Ficd	228.3898274	1.457273074	0.254810921	5.719036961	1.07E-08	1.40E-07
Nap1l5	1082.427488	3.594584934	0.628539092	5.718952054	1.07E-08	1.40E-07
Arhgef26	2595.415332	3.317088051	0.58009441	5.718186547	1.08E-08	1.40E-07
Gm40783	8.673019912	-3.88401405	0.679547186	-5.715591394	1.09E-08	1.42E-07
Hn1l	2492.694401	-3.065214459	0.536339015	-5.715068965	1.10E-08	1.43E-07
Maob	81.90615163	-3.027330462	0.529732418	-5.714829528	1.10E-08	1.43E-07
Gm35149	3.906501236	-2.074801528	0.363143803	-5.713443294	1.11E-08	1.44E-07
Slc25a42	307.7992406	2.106220466	0.36886048	5.710073535	1.13E-08	1.47E-07
Dixdc1	3347.509356	1.722989317	0.301811714	5.708821889	1.14E-08	1.48E-07
Ccser1	565.2623688	1.763390036	0.30890716	5.708479003	1.14E-08	1.48E-07
Trpm8	15.55549932	5.848238715	1.024749216	5.706995059	1.15E-08	1.49E-07
Ephx2	499.5473994	3.065565062	0.53718698	5.706700234	1.15E-08	1.49E-07
Arhgap8	3.542133288	-3.755471307	0.658129465	-5.706280458	1.15E-08	1.50E-07
Gba2	1697.199274	0.832760092	0.14599244	5.704131628	1.17E-08	1.52E-07
Efna4	100.3720145	-3.043600925	0.533703996	-5.702788342	1.18E-08	1.53E-07
Mamstr	82.64960379	1.548196772	0.271550471	5.701322357	1.19E-08	1.54E-07
Acad10	247.4999851	1.604060625	0.281397858	5.700329899	1.20E-08	1.55E-07
Fbn2	2117.258538	-3.838958113	0.673497093	-5.70003665	1.20E-08	1.55E-07
Pinx1	166.1811271	-1.376974818	0.241591934	-5.699589372	1.20E-08	1.55E-07
Iars	2905.396006	-1.116765249	0.195941976	-5.699469155	1.20E-08	1.55E-07
Dbp	221.1437771	3.098881345	0.543865679	5.697879942	1.21E-08	1.57E-07
Pan2	3709.160879	0.714273972	0.125390085	5.696415107	1.22E-08	1.58E-07
LOC105246151	56.39541709	4.359987479	0.765470065	5.695830152	1.23E-08	1.58E-07
Gm15401	7.55395257	-2.700463797	0.47415138	-5.695362097	1.23E-08	1.59E-07
Tmem243	875.1665779	2.691923765	0.472656846	5.695302597	1.23E-08	1.59E-07
Amotl1	1069.306547	-1.96563134	0.345203941	-5.694116157	1.24E-08	1.60E-07
Fgf2os	132.5862946	4.363286106	0.766310723	5.693886271	1.24E-08	1.60E-07
Doc2g	154.9543497	1.605584112	0.281996442	5.693632525	1.24E-08	1.60E-07
Hsd17b10	559.3455891	-1.551246011	0.272496175	-5.692725824	1.25E-08	1.61E-07
Tmem185b	262.2273423	-1.448933398	0.254537136	-5.692424384	1.25E-08	1.61E-07
Nedd1	828.1096077	-1.622142378	0.284982108	-5.69208499	1.25E-08	1.61E-07
Smyd5	562.7847062	-1.515463706	0.266264238	-5.69157811	1.26E-08	1.62E-07
Gm33046	10.29651816	-1.506386545	0.264695719	-5.691012112	1.26E-08	1.62E-07
Col3a1	153.8204021	-4.002178387	0.703322796	-5.690386282	1.27E-08	1.63E-07
Zfp825	171.499261	-1.087823556	0.191225729	-5.688688233	1.28E-08	1.64E-07
Ang	5.922274757	-2.337510029	0.410987314	-5.687547893	1.29E-08	1.65E-07
Gm12474	16.71684335	-2.332169225	0.410083488	-5.687059567	1.29E-08	1.65E-07
Lztfl1	2665.013844	1.368954291	0.240750674	5.6861909	1.30E-08	1.66E-07
Gm39386	20.18982913	3.335711194	0.586653502	5.685998948	1.30E-08	1.66E-07
Spsb4	326.647383	-1.843247138	0.32422575	-5.685073252	1.31E-08	1.67E-07
Rtn4rl2	462.3500862	2.60425359	0.458083033	5.685112522	1.31E-08	1.67E-07
Eml3	2892.905925	2.443501843	0.429866248	5.684330545	1.31E-08	1.68E-07
Gm26637	9.026525171	-2.047410749	0.360194674	-5.684178303	1.31E-08	1.68E-07
LOC108167425	13.84270365	1.771603198	0.311685744	5.683940426	1.32E-08	1.68E-07
LOC102632383	11.63589728	-4.936913417	0.869004665	-5.681112675	1.34E-08	1.71E-07
Crebl2	499.6815977	1.877644112	0.330565163	5.680102812	1.35E-08	1.72E-07
Dhrs4	220.4166853	-1.202419752	0.211789446	-5.677429982	1.37E-08	1.74E-07
Angptl2	217.6597893	-2.716920068	0.478587622	-5.676954315	1.37E-08	1.75E-07
Gm33449	23.16669466	5.677864833	1.000410674	5.675534041	1.38E-08	1.76E-07
Gm4211	7.904222343	5.454374452	0.961540698	5.672536238	1.41E-08	1.79E-07
Slco4c1	22.81508696	2.932792075	0.517120066	5.671394848	1.42E-08	1.80E-07
Zfp599	128.0843031	-1.515042538	0.267171299	-5.670678488	1.42E-08	1.81E-07
Sp7	10.73781591	2.754541638	0.485968171	5.668152369	1.44E-08	1.83E-07
Mrpl35	460.564035	-0.646832308	0.114149338	-5.666544536	1.46E-08	1.85E-07
Gm9899	119.1557561	3.159433506	0.557659374	5.665525688	1.47E-08	1.86E-07
Ttc21a	159.0522622	2.866985343	0.506060675	5.665299611	1.47E-08	1.86E-07
Smad3	939.1144115	-2.17864833	0.38481111	-5.661604551	1.50E-08	1.90E-07
Zfp787	872.5779209	2.103703238	0.371679739	5.659989015	1.51E-08	1.92E-07
Gm20627	44.17482509	3.846492906	0.679622835	5.659746417	1.52E-08	1.92E-07
Decr1	566.0375469	-0.901206819	0.159244763	-5.659255619	1.52E-08	1.92E-07
Scg5	2608.862712	2.522178231	0.445706208	5.658835768	1.52E-08	1.93E-07
Itgb3	31.88027847	-2.485044058	0.439183505	-5.658327401	1.53E-08	1.93E-07
Fbxl22	28.80016303	-1.749624904	0.309330712	-5.65616293	1.55E-08	1.96E-07
Slc27a2	257.2149776	3.987603825	0.705043673	5.655825276	1.55E-08	1.96E-07
Psme3	2598.32202	-0.686257967	0.121346641	-5.655351991	1.56E-08	1.96E-07
Tnfrsf12a	24.45225411	1.770879337	0.313163213	5.65481278	1.56E-08	1.97E-07
Fbln1	396.8695787	-3.343239778	0.591235171	-5.654669994	1.56E-08	1.97E-07
Gpr37l1	7.966743209	6.125983544	1.083400833	5.65440173	1.56E-08	1.97E-07
Ranbp3l	14.28489387	1.831483173	0.323914716	5.654214157	1.57E-08	1.97E-07
Dhcr24	1863.485308	-2.272105826	0.401891354	-5.653532487	1.57E-08	1.98E-07
Fermt1	9.780221551	-5.805990965	1.02710111	-5.652793973	1.58E-08	1.99E-07
Hspa1a	182.8652019	3.870022133	0.684676021	5.65234069	1.58E-08	1.99E-07
Scn4a	372.1632367	3.420509364	0.6052705	5.651207785	1.59E-08	2.00E-07
Srpk3	27.11967429	2.72685895	0.482550976	5.650924123	1.60E-08	2.01E-07
LOC105244170	16.38639782	6.844080244	1.211330751	5.650050769	1.60E-08	2.01E-07
Peo1	598.573298	-1.348041456	0.23860366	-5.649709871	1.61E-08	2.02E-07
Grina	8640.660308	2.971551392	0.526180455	5.647399795	1.63E-08	2.04E-07
LOC108169085	6.780293969	5.843705962	1.035410793	5.643852661	1.66E-08	2.09E-07
X1700029N11Rik	6.587322942	5.518756981	0.977954452	5.643163618	1.67E-08	2.09E-07
Serpinh1	2106.657279	-2.852760471	0.505593622	-5.642398053	1.68E-08	2.10E-07
Gm39138	1.386716703	-3.614429059	0.640664061	-5.641691609	1.68E-08	2.11E-07
Chrna6	827.4637253	4.751216591	0.842216908	5.641321785	1.69E-08	2.11E-07
Gys1	429.8834191	-1.74865947	0.309978942	-5.6412202	1.69E-08	2.11E-07
Dnah6	16.89356902	4.368255724	0.77441386	5.640725132	1.69E-08	2.12E-07
Six4	80.24792454	-3.292938407	0.583856721	-5.639976879	1.70E-08	2.13E-07
LOC102635844	70.10242242	-1.492768372	0.264700229	-5.639467621	1.71E-08	2.13E-07
Slc17a8	119.7547957	3.949217792	0.70042236	5.638337694	1.72E-08	2.14E-07
Ms4a6d	6.557729738	-2.728824796	0.483986241	-5.63822804	1.72E-08	2.14E-07
Mbnl3	194.6145674	-3.285649597	0.582812796	-5.637572853	1.72E-08	2.15E-07
[truncated: 1,001 more rows]
